# Supplementary material for: Targeted DNA transposition in vitro using a dCas9-transposase fusion protein
Source: PubMed Central journal article supplement (PMC6735945; doi:10.1093/nar/gkz552), 2019-06-25
Supplement: gkz552_supplemental_file.pdf [file gkz552_supplemental_file.pdf]

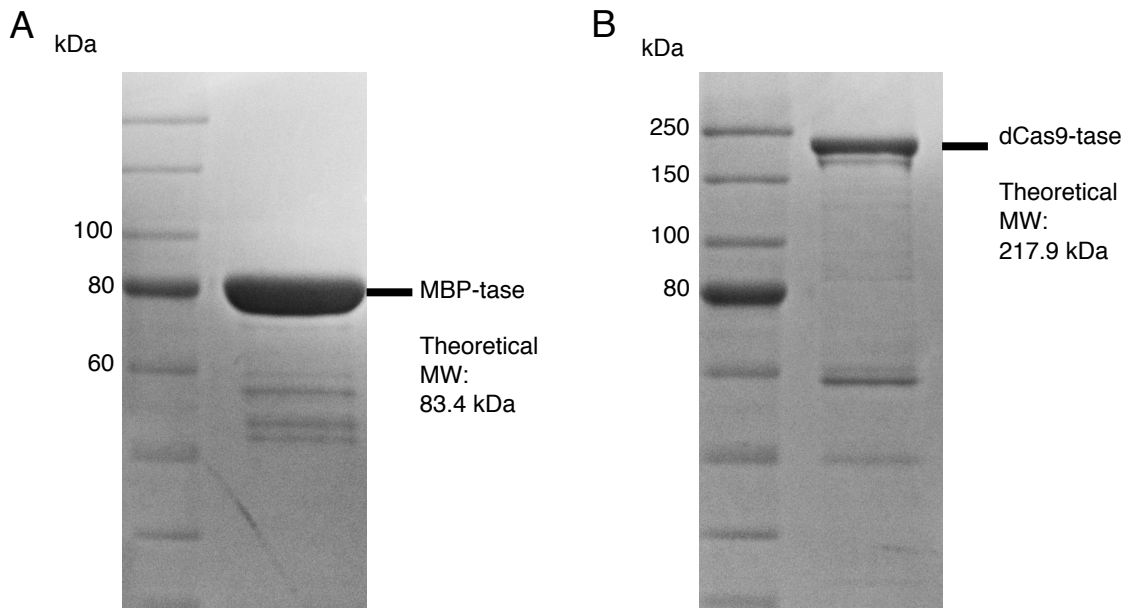

Supplementary Figure S1. Purification of MBP-Hsmar1 transposase and dCas9-transposase. Purified protein was analysed by SDS-PAGE to gauge protein purity. **A)** MBP-Hsmar1 transposase accounts for ~95% total protein. **B)** dCas9-transposase accounts for ~85% total protein.

## Supplemental Table 1 Plasmid Sequences

pRC704

AATTCTATTAGGTTGGTGCAAAAGTAATTGCGGTTTTGGATCCGGCTGTAATCCG  
GGCAGCGCAACGGAACATTCATCAGTGTA AAAATGGAATCAATAAAGCCCTGCG  
CAGCGCGCAGGGTCAGCCTGAATACGCGTTTAATGACCAGCACAGTCGTGATG  
GCAAGGTCAGAATAGCGCTGAGGTCTGCCTCGTGAAGAAGGTGTTGCTGACTC  
ATACCAGGCCTGAATCGCCCCATCATCCAGCCAGAAAGTGAGGGAGCCACGGT  
TGATGAGAGCTTTGTTGTAGGTGGACCAGTTGGTGATTTTGAACTTTTGCTTTGC  
CACGGAACGGTCTGCGTTGTCGGGAAGATGCGTGATCTGATCCTTCAACTCAGC  
AAAAGTTCGATTTATTCAACAAAGCCACGTTGTGTCTCAAATCTCTGATGTTAC  
ATTGCACAAGATAAAAATATATCATCATGAACAATAAAACTGTCTGCTTACATAAA  
CAGTAATACAAGGGGTGTTATGAGCCATATTCAACGGGAAACGTCTTGCTCGAG  
GCCGCGATTAAATCCAACATGGATGCTGATTTATATGGGTATAAATGGGCTCG  
CGATAATGTCGGGCAATCAGGTGCGACAATCTATCGATTGTATGGGAAGCCCGA  
TGCGCCAGAGTTGTTTCTGAAACATGGCAAAGGTAGCGTTGCCAATGATGTTAC  
AGATGAGATGGTCAGACTAAACTGGCTGACGGAATTTATGCCTCTTCCGACCAT  
CAAGCATTTTATCCGTA CTCTGATGATGCATGGTTACTCACCCTGCGATCCCC  
GGGAAAACAGCATTCCAGGTATTAGAAGAATATCCTGATTCAGGTGAAAATATTG  
TTGATGCGCTGGCAGTGTTCCCTGCGCCGGTTGCATTCGATTCCTGTTTTGTAATT  
GTCCTTTTAAACAGCGATCGCGTATTTCTGCTCGCTCAGGCGCAATCACGAATGA  
ATAACGGTTTTGGTTGATGCGAGTGATTTTGATGACGAGCGTAATGGCTGGCCTG  
TTGAACAAGTCTGGAAAGAAATGCATAAGCTTTTGCCATTCTCACCGGATTCAGT  
CGTCACTCATGGTGATTTCTCACTTGATAACCTTATTTTTGACGAGGGGAAATTA  
ATAGGTTGTATTGATGTTGGACGAGTCGGAATCGCAGACCGATAACCAGGATCTT  
GCCATCCTATGGAACCTGCCTCGGTGAGTTTTCTCCTTCATTACAGAAACGGCTTT  
TTCAAAAATATGGTATTGATAATCCTGATATGAATAAATTGCAGTTTCATTTGATG  
CTCGATGAGTTTTTCTAATCAGAATTGGTTAATTGGTTGTAACACTGGCAGAGCA  
TTACGCTGACTTGACGGGACGGCGGCTTTGTTGAATAAATCGAACTTTTGCTGA  
GTTGAAGGATCAGATCACGCATCTTCCCGACAACGCAGACCGTTCCGTGGCAA  
GCAAAAGTTCAAATCACCAACTGGTCCACCTACAACAAAGCTCTCATCAACCG  
TGGCTCCCTCACTTTCTGGCTGGATGATGGGGCGATTCAGGCCTGGTATGAGTC  
AGCAACACCTTCTTACGAGGCAGACCTCAGCGCTATTCTGACCTTGCCATCAC  
GACTGTGCTGGTCATTAAACGCGTATTCAGGCTGACCCTGCGCGCTGCGCAGG  
GCTTTATTGATTCCATTTTTACACTGATGAATGTTCCGTTGCGCTGCCCGGATTA  
CAGCCGGATCCGGCCACGATGCGTCCGGCGTAGAGGATCTGAAGATCAGCAGT  
TCAACCTGTTGATAGTACGTAAGCTCTCATGTTTCACGTAAGCTCTCAT  
GTTTAACGTACTAAGCTCTCATGTTTAACGAACTAAACCCTCATGGCTAACGTAC  
TAAGCTCTCATGGCTAACGTACTAAGCTCTCATGTTTCACGTAAGCTCTCAT  
GTTTGAACAATAAAATTAATAAATCAGCAACTTAAATAGCCTCTAAGGTTTTAA  
GTTTTATAAGAAAAAAAAGAATATATAAGGCTTTTTAAAGCTTTTTAAGGTTTAA  
CGGTTGTGGACAACAAGCCAGGGATGTAACGCACTGAGAAGCCCTTAGAGCCTCTCA  
AAGCAATTTTGAGTGACACAGGAACACTTAACGGCTGACATGGGAATTCCACAT

GTGGAATTCCACATGTGGAATTGTGAGCGGATAACAATTTGTGGAATTCCTGGG  
AGAGCTCGATATCGCATGCGGTACCTCTAGAAGAAGCTTGGGATCCAAAACCGC  
AATTACTTTTGCACCAACCTAATAGAATTCTGGCGTAATAGCGAAGAGGCCCGC  
ACCGATCGCCCTTCCCAACAGTTGCGCAGCCTGAATGGCGAATGGGACGCGCC  
CTGTAGCGGCGCATTAAAGCGCGGCGGGTGTGGTGGTTACGCGCAGCGTGACC  
GCTACACTTGCCAGCGCCCTAGCGCCCGCTCCTTTTCGCTTTCTTCCCTTCCTTT  
CTCGCCACGTTTCGCCGGCTTTCCCCGTCAAGCTCTAAATCGGGGGCTCCCTTTA  
GGGTTCCGATTTAGTGCTTTACGGCACCTCGACCCCAAAAACTTGATTAGGGT  
GATGGTTCACGTAGTGGGCCATCGCCCTGATAGACGGTTTTTTCGCCCTTTGACG  
TTGGAGTCCACGTTCTTTAATAGTGGACTCTTGTTCCAAACCTGGAACAACACTCA  
ACCCTATCTCGGTCTATTCTTTTATTATAAGGGATTTTTCGCCATTTTCGGCCTAT  
TGGTTAAAAAATGAGCTGATTTAACAAAAATTTAACGCGAATTTTAAACAAAATATT  
AACGCTTACAATTTAGGTGGCACTTTTTCGGGGAAATGTGCGCGGAACCCCTATT  
TGTTTTATTTTTCTAAATACATTCAAATATGTATCCGCTCATGAGACAATAACCCTG  
ATAAATGCTTCAATAATATTGAAAAAGGAAGAGTATGAGTATTCAACATTTCCGT  
GTCGCCCTTATTCCCTTTTTTTCGGGCATTTTGCCTTCCTGTTTTTGTCAACCAG  
AAACGCTGGTGAAGTAAAGATGCTGAAGATCAGTTGGGTGCACGAGTGGGTT  
ACATCGAACTGGATCTCAACAGCGGTAAGATCCTTGAGAGTTTTTCGCCCGAAG  
AACGAGCGGAAGAGCGCCCAATACGCAAACCGCCTCTCCCCGCGCGTTGGCCG  
ATTCATTAATGCAG

pRC1104

TTCAGTTTAGCCTTAACCGGCGCATGACTTCAAGACTAACTCCTCTAAATCAATT  
ACCAGTGGCTGCTGCCAGTGGTGCTTTTTGCATGTCTTTCCGGGTTGGACTCAAG  
ACGATAGTTACCGGATAAGGCGCAGCGGTCCGACTGAACGGGGGGTTCGTGCA  
TACAGTCCAGCTTGGAGCGAACTGCCTACCCGGAACCTGAGTGTCAAGGCGTGGA  
ATGAGACAAACGCGGCCATAACAGCGGAATGACACCGGTAAACCGAAAGGCAG  
GAACAGGAGAGCGCACGAGGGAGCCGCCAGGGGGAAACGCCTGGTATCTTTAT  
AGTCCTGTCCGGTTTTCGCCACCACTGATTTGAGCGTCAGATTTTCGTGATGCTTG  
TCAGGGGGGCGGAGCCTATGGAAAACGGCTTTGCCGCGGCCCTCTCACTTCC  
CTGTTAAGTATCTTCCCTGGCATCTTCCAGGAAATCTCCGCCCCGTTTCGTAAGCC  
ATTTCCGCTCGCCGAGTTCGAACGACCGAGCGTAGCGAGTCAGTGAGCGAGGA  
AGCGGAATATATCCTGTATCACATATTCTGCTGACGCACCGGTGCAGCCTTTTTT  
CTCCTGCCACATGAAGCACTTCACTGACACCCTCATCAGTGCCAACATAGTAAG  
CCAGTATACACTCCGCTAGCGCTGATGTCCGGCGGTGCTTTTTGCCGTTACGCAC  
CACCCCGTCAGTAGCTGAACAGGAGGGACAGCTGATAGAAACAGAAGCCACTG  
GAGCACCTCAAAAACACCATCATACACTAAATCAGTAAGTTGGCAGCATCACCC  
GACGCACTTTGCGCCGAATAAATACCTGTGACGGAAGATCACTTCGCAGAATAA  
ATAAATCCTGGTGTCCCTGTTGATACCGGGAAGCCCTGGGCCAACTTTTTGGCGA  
AAATGAGACGTTGATCGGCACGTAAGAGGTTCCAACCTTTCACCATAATGAAATAA  
GATCACTACCGGGCGTATTTTTTGGAGTTATCGAGATTTTCAGGAGCTAAGGAAG  
CTAAAATGGAGAAAAAATCACTGGATATACCACCGTTGATATATCCCAATGGCA  
TCGTAAAGAACATTTTTGAGGCATTTTCAGTCAGTTGCTCAATGTACCTATAACCAG

ACCGTTCAGCTGGATATTACGGCCTTTTTAAAGACCGTAAAGAAAAATAAGCACA  
AGTTTTATCCGGCCTTTATTACATTCTTGCCCGCCTGATGAATGCTCATCCGGA  
ATCCGTATGGCAATGAAAGACGGTGAGCTGGTGATATGGGATAGTGTTACCC  
TTGTTACACCGTTTTTCCATGAGCAAACCTGAAACGTTTTTCATCGCTCTGGAGTGAA  
TACCACGACGATTTCCGGCAGTTTCTACACATATATTCGCAAGATGTGGCGTGTT  
ACGGTGAAAACCTGGCCTATTTCCCTAAAGGGTTTATTGAGAATATGTTTTTCGT  
CTCAGCgAATCCCTGGGTGAGTTTACCAGTTTTGATTTAAACGTGGCCAATATG  
GACAACTTCTTCGCCCCCGTTTTACCATGGGCAAATATTATACGCAAGGCGAC  
AAGGTGCTGATGCCGCTGGCGATTACAGGTTTCATCATGCCGTCTGTGATGGCTTC  
CATGTCCGCAGAATGCTTAATGAATTACAACAGTACTGCGATGAGTGGCAGGGC  
GGGGCGTAATTTTTTTAAAGGCAGTTATTGGTGCCCTTAAACGCCTGGTGCTACG  
CCTGAATAAGTGATAATAAGCGGATGAATGGCAGAAATTCGAAAGCAAATTCGA  
CCCGGTGCTCGGTTCCAGGGCAGGGTCGTAAATAGCCGCTTATGTCTATTGCTG  
GTTTACCGGTTTATTGACTACCGGAAGCAGTGTGACCGTGTGCTTCTCAAATGC  
CTGAGGCCAGTTTGCTCAGGCTCTCCCCGTGGAGGTAATAATTGACGATATGAT  
CATTTATTCTGCCTCCCAGAGCCTGATAAAAACGGTTAGCGCTTCGTTAATACAG  
ATGTAGGTGTTCCACAGGGTAGCCAGCAGCATCCTGCGATGCAGATCCGGAAC  
ATAATGGTGCAGGGCGCTTGTTTCGGCGTGGGTATGGTGGCAGGCCCCCGTGGC  
CGGGGGACTGTTGGGCGCTGCCGGCACCTGTCCTACGAGTTGCATGATAAAGA  
AGACAGTCATAAGTGCGGGCAGGATAGTCATGCCCCGCGCCCACCGGAAGGAG  
CTACCGGACAGCGGTGCGGACTGTTGTAACCTCAGAATAAGAAATGAGGCCGCT  
CATGGCGTTGACTCTCAGTCATAGTATCGTGGTATCACCGGTTGGTTCCACTCT  
CTGTTGCGGGCAACTTCAGCAGCACGTAGGGGACTTCCGCGTTTCCAGACTTTA  
CGAAACACGGAAACCGAAGACCATTTCATGTTGTTGCTCAGGTGCGCAGACGTTTT  
GCAGCAGCAGTCGCTTTCAGTTCGCTCGCGTATCGGTGATTCATTCTGCTAACC  
AGTAAGGCAACCCCGCCAGCCTAGCCGGGTCCTCAACGACAGGAGCACGATCA  
TGCGCACCCGTGGCCAGGACCCAACGCTGCCCGAGATGCGCCGCGTGCGGCT  
GCTGGAGATGGCGGACGCGATGGATATGTTCTGCCAAGGGTTGGTTTGCGCAT  
TCACAGTTCTCCGCAAGAATTGATTGGCTCCAATTCTTGAGTGGTGAATCCGTT  
AGCGAGGTGCCGCCGGCTTCCATTCAGGTGCGAGGTGGCCCGGCTCCATGCACC  
GCGACGCAACGCGGGGAGGCAGACAAGGTATAGGGCGGGCGCCTACAATCCAT  
GCCAACCCGTTCCATGTGCTCGCCGAGGCGGCATAAATCGCCGTGACGATCAG  
CGGTCCAGTGATCGAAGTTAGGCTGGTAAGAGCCGCGAGCGATCCTTGAAGCT  
GTCCCTGATGGTTCGTCATCTACCTGCCTGGACAGCATGGCCTGCAACGCGGGC  
ATCCCGATGCCGCCGGAAGCGAGAAGAATCATAATGGGGAAGGCCATCCAGCC  
TCGCGTCGCGAACGCCAGCAAGACGTAGCCCAGCGCGTCCGGCCGCCATGCCG  
GCGATAATGGCCTGCTTCTCGCCGAAACGTTTTGGTGGCGGGACCAGTGACGAA  
GGCTTGAGCGAGGGCGTGCAAGATTCCGAATACCGCAAGCGACAGGCCGATCA  
TCGTCCGCTCCAGCGAAAGCGGTCCCTCGCCGAAAATGACCCAGAGCGCTGCC  
GGCACCTGTCCTACGAGTTGCATGATAAAGAAGACAGTCATAAGTGCGGCGAC  
GATAGTCATGCCCCGCGCCCACCGGAAGGAGCTGACTGGGTTGAAGGCTCTCA  
AGGGCATCGGTGACGCTCTCCCTTATGCGACTCCTGCATTAGGAAGCAGCCC  
AGTAGTAGGTTGAGGCCGTTGAGCACCGCCGCCGCAAGGAATGGTGCATGCAA  
GGAGATGGCGCCCAACAGTCCCCCGGCCACGGGGCCTGCCACCATACCCACG

CCGAAACAAGCGCTCATGAGCCCGAAGTGGCGAGCCCGATCTTCCCCATCGGT  
GATGTGGCGATATAGGCGCCAGCAACCGCACCTGTGGCGCCGGTGATGCCG  
GCCACGATGCGTCCGGCGTAGAGGATCCACAGGACGGGTGTGGTCCGCATGAT  
CGCGTAGTCGATAGTGGCTCCAAGTAGCGAAGCGAGCAGGACTGGGCGGCGG  
CCAAAGCGGTTCGGACAGTGCTCCGAGAACGGGTGCGCATAGAAATTGCATCAA  
CGCATATAGCGCTAGCAGCACGCCATAGTGACTIONGGCGATGCTGTCCGAATGGA  
CGATATCCCGCAAGAGGCCCGGCAGTACCGGCATAACCAAGCCTATGCCTACA  
GCATCCAGGGTGACGGTGCCGAGGATGACGATGAGCGCATTGTTAGATTTTCATA  
CACGGTGCCTGACTGCGTTAGCAATTTAACTGTGATAAACTACCGCATTAAAGCT  
TATCGATGATAAGCTGTCAAACATGAGAATTACAACCTTATATCGTATGGGGCTGA  
CTTCAGGTGCTACATTTGAAGAGATAAATTGCACTGAAATCTAGAAATATTTTATC  
TGATTAATAAGATGATCTTCTTGAGATCGTTTTGGTCTGCGCGTAATCTCTTGCT  
CTGAAAACGAAAAACCGCCTTGCAGGGCGGTTTTTCGAAGTTCTCTGAGCTA  
CCAACTCTTTGAACCGAGGTAACCTGGCTTGGAGGAGCGCAGTCACCAAACTTG  
TCCTTTCAGTTTAGCCTTAACCGGCGCATGACTTCAAGACTAACTCCTCTAAATC  
AATTACCAGTGGCTGCTGCCAGTGGTGCTTTTGCATGTCTTTCCGGGTTGGACT  
CAAGACGATAGTTACCGGATAAAGGCGCAGCGGTTCGGACTGAACGGGGGGTTCCG  
TGCATACAGTCCAGCTTGGAGCGAACTGCCTACCCGGAACCTGAGTGTGAGGCG  
TGGAATGAGACAAACGCGGCCATAACAGCGGAATGACACCGGTAAACCGAAAG  
GCAGGAACAGGAGAGCGCACGAGGGAGCCGCCAGGGGGAAACGCCTGGTATC  
TTTATAGTCCTGTCGGGTTTTCGCCACCACTGATTTGAGCGTCAGATTTCTGTGATG  
CTTGTGAGGGGGGCGGAGCCTATGGAAAACGGCTTTGCCGCGGCCCTCTCAC  
TTCCCTGTTAAGTATCTTCTGGCATCTTCCAGGAAATCTCCGCCCCCGTTCTGTA  
GCCATTTCCGCTCGCCGCAGTCGAACGACCGAGCGTAGCGAGTCAGTGAGCGA  
GGAAGCGGAATATATCCTGTATCACATATTCTGCTGACGCACCGGTGCAGCCTT  
TTTTCTCCTGCCACATGAAGCACTTCACTGACACCCTCATCAGTGCCAACATAGT  
AAGCCAGTATACACTCCGCTAGCGCTGATGTCCGGCGGTGCTTTTGCCGTTACG  
CACCACCCCGTCAGTAGCTGAACAGGAGGGACAGCTGATAGAAACAGAAGCCA  
CTGGAGCACCTCAAAAACACCATCATACTAAATCAGTAAGTTGGCAGCATCA  
CCCGACGCACTTTGCGCCGAATAAATACCTGTGACGGAAGATCACTTCGCAGAA  
TAAATAAATCCTGGTGTCCCTGTTGATACCGGGAAGCCCTGGGCCAACTTTTGG  
CGAAAATGAGACGTTGATCGGCACGTAAGAGGTTCCAACCTTTCACCATAATGAA  
ATAAGATCACTACCGGGCGTATTTTTTGGAGTTATCGAGATTTTCAGGAGCTAAGG  
AAGCTAAAATGGAGAAAAAATCACTGGATATACCACCGTTGATATATCCCAATG  
GCATCGTAAAGAACATTTTGGAGGCATTTTCAGTCAGTTGCTCAATGTACCTATAAC  
CAGACCGTTCAGCTGGATATTACGGCCTTTTTAAAGACCGTAAAGAAAAATAAG  
CACAAGTTTTATCCGGCCTTTATTCACATTCTTGCCCGCCTGATGAATGCTCATC  
CGGAATTCGTATGGCAATGAAAGACGGTGAGCTGGTGTATATGGGATAGTGTTCC  
ACCCTTGTTACACCGTTTTCCATGAGCAAACCTGAAACGTTTTTCATCGCTCTGGAG  
TGAATACCACGACGATTTCCGGCAGTTTCTACACATATATTCGCAAGATGTGGC  
GTGTTACGGTGAACCTGGCCTATTTCCCTAAAGGGTTTATTGAGAATATGTTT  
TTCGTCTCAGCgAATCCCTGGGTGAGTTTACCAGTTTTGATTTAAACGTGGCCA  
ATATGGACAACCTTCTTCGCCCCCGTTTTTACCATGGGCAAATATTATACGCAAGG  
CGACAAGGTGCTGATGCCGCTGGCGATTACAGTTTCATCATGCCGTCTGTGATG

GCTTCCATGTCGGCAGAATGCTTAATGAATTACAACAGTACTGCGATGAGTGGC  
AGGGCGGGGCGTAATTTTTTTAAGGCAGTTATTGGTGCCCTTAAACGCCTGGTG  
CTACGCCTGAATAAGTGATAATAAGCGGATGAATGGCAGAAATTCGAAAGCAAA  
TTCGACCCGGTCGTCGGTTCAGGGCAGGGTCGTTAAATAGCCGCTTATGTCTAT  
TGCTGGTTTACCGGTTTATTGACTACCGGAAGCAGTGTGACCGTGTGCTTCTCA  
AATGCCTGAGGCCAGTTTGCTCAGGCTCTCCCCGTGGAGGTAATAATTGACGAT  
ATGATCATTATTCTGCCTCCAGAGCCTGATAAAAACGGTTAGCGCTTCGTTAA  
TACAGATGTAGGTGTTCCACAGGGTAGCCAGCAGCATCCTGCGATGCAGATCC  
GGAACATAATGGTGCAGGGCGCTTGTTCGGCGTGGGTATGGTGGCAGGCCCC  
GTGGCCGGGGGACTGTTGGGCGCTGCCGGCACCTGTCCTACGAGTTGCATGAT  
AAAGAAGACAGTCATAAGTGCGGCGACGATAGTCATGCCCCGCGCCCACCGGA  
AGGAGCTACCGGACAGCGGTGCGGACTGTTGTA ACTCAGAATAAGAAATGAGG  
CCGCTCATGGCGTTGACTCTCAGTCATAGTATCGTGGTATCACCGGTTGGTTCC  
ACTCTCTGTTGCGGGCAACTTCAGCAGCACGTAGGGGACTTCCGCGTTTCCAGA  
CTTTACGAAACACGGAAACCGAAGACCATTGTTGTTGCTCAGGTGCGCAGAC  
GTTTTGCAGCAGCAGTCGCTTCACGTTTCGCTCGCGTATCGGTGATTCTTCTGC  
TAACCAGTAAGGCAACCCCGCCAGCCTAGCCGGGTCTCAACGACAGGAGCAC  
GATCATGCGCACCCGTGGCCAGGACCCAACGCTGCCCGAGATGCGCCGCGTG  
CGGCTGCTGGAGATGGCGGACGCGATGGATATGTTCTGCCAAGGGTTGGTTTG  
CGCATTCACAGTTCTCCGCAAGAATTGATTGGCTCCAATTCTTGGAGTGGTGAA  
TCCGTTAGCGAGGTGCCGCCGGCTTCCATTCAGGTCGAGGTGGCCCCGGCTCCA  
TGCACCGCGACGCAACGCGGGGAGGCAGACAAGGTATAGGGCGGCGCCTACA  
ATCCATGCCAACCCGTTCCATGTGCTCGCCGAGGCGGCATAAATCGCCGTGAC  
GATCAGCGGTCCAGTGATCGAAGTTAGGCTGGTAAGAGCCGCGAGCGATCCTT  
GAAGCTGTCCCTGATGGTCGTCATCTACCTGCCTGGACAGCATGGCCTGCAAC  
GCGGGCATCCCGATGCCGCCGGAAGCGAGAAGAATCATAATGGGGGAAGGCCAT  
CCAGCCTCGCGTTCGCGAACGCCAGCAAGACGTAGCCCAGCGCGTCCGGCCGCC  
ATGCCGGCGATAATGGCCTGCTTCTCGCCGAAACGTTTGGTGGCGGGACCAGT  
GACGAAGGCTTGAGCGAGGGCGTGCAAGATTCCGAATACCGCAAGCGACAGGC  
CGATCATCGTCGCGCTCCAGCGAAAGCGGTCTCGCCGAAAATGACCCAGAGC  
GCTGCCGGCACCTGTCTACGAGTTGCATGATAAAGAAGACAGTCATAAGTGCG  
GCGACGATAGTCATGCCCCGCGCCACCGGAAGGAGCTGACTGGGTTGAAGG  
CTCTCAAGGGCATCGGTGACGCTCTCCCTTATGCGACTCCTGCATTAGGAAGC  
AGCCCAGTAGTAGGTTGAGGCCGTTGAGCACCGCCGCCGCAAGGAATGGTGCA  
TGCAAGGAGATGGCGCCCAACAGTCCCCCGGCCACGGGGCCTGCCACCATAC  
CCACGCCGAAACAAGCGCTCATGAGCCCGAAGTGGCGAGCCCGATCTTCCCCA  
TCGGTGATGTCGGCGATATAGGCGCCAGCAACCGCACCTGTGGCGCCGGTGAT  
GCCGGCCACGATGCGTCCGGCGTAGAGGATCCACAGGACGGGTGTGGTCCGCC  
ATGATCGCGTAGTCGATAGTGGCTCCAAGTAGCGAAGCGAGCAGGACTGGGCG  
GCGGCCAAAGCGGTTCGGACAGTGCTCCGAGAACGGGTGCGCATAGAAATTGCA  
TCAACGCATATAGCGCTAGCAGCACGCCATAGTACTGGCGATGCTGTCCGAAT  
GGACGATATCCCGCAAGAGGCCCGGCAGTACCGGCATAACCAAGCCTATGCCT  
ACAGCATCCAGGGTGACGGTGCCGAGGATGACGATGAGCGCATTGTTAGATTT  
CATACACGGTGCTGACTGCGTTAGCAATTTAACTGTGATAAACTACCGCATTA

AGCTTATCGATGATAAGCTGTCAAACATGAGAATTACAACCTTATATCGTATGGGG  
CTGACTTCAGGTGCTACATTTGAAGAGATAAATTGCACTGAAATCTAGAAATATT  
TTATCTGATTAATAAGATGATCTTCTTGAGATCGTTTTGGTCTGCGCGTAATCTCT  
TGCTCTGAAAACGAAAAACCGCCTTGACAGGGCGGTTTTTCGAAGGTTCTCTGA  
GCTACCAACTCTTTGAACCGAGGTAAGTGGCTTGGAGGAGCGCAGTCACCAAAA  
CTTGTCT

pRC2301

GAATTCCGGATGAGCATTTCATCAGGCGGGCAAGAATGTGAATAAAGGCCGGAT  
AAAACCTTGTGCTTATTTTTCTTACGGTCTTTAAAAGGCCGTAATATCCAGCTGA  
ACGGTCTGGTTATAGGTACATTGAGCAACTGACTGAAATGCCTCAAATGTTCTT  
TACGATGCCATTGGGATATATCAACGGTGGTATATCCAGTGATTTTTTTCTCCAT  
TTAGCTTCCTTAGCTCCTGAAAATCTCGATAACTCAAAAATACGCCCGGTAGT  
GATCTTATTTTATTATGGTGAAAGTTGGAACCTCTTACGTGCCGATCAACGTCTC  
ATTTTCGCCAAAAGTTGGCCCAGGGCTTCCCGGTATCAACAGGGACACCAGGAT  
TTATTTATTCTGCGAAGTGATCTTCCGTCACAGGTATTTATTCGGCGCAAAGTGC  
GTCGGGTGATGCTGCCAACTTACTGATTTAGTGTATGATGGTGTTTTTGAGGTG  
CTCCAGTGGCTTCTGTTTCTATCAGCTGTCCCTCCTGTTTCAGCTACTGACGGGG  
TGGTGCGTAACGGCAAAGCACCGCCGGACATCAGCGCTAGCGGAGTGTATAC  
TGGCTTACTATGTTGGCACTGATGAGGGTGTGAGTGAAGTGCTTCATGTGGCAG  
GAGAAAAAAGGCTGCACCGGTGCGTCAGCAGAATATGTGATACAGGATATATTC  
CGCTTCTCGCTCACTGACTCGCTACGCTCGGTGCTTCGACTGCGGCGAGCGG  
AAATGGCTTACGAACGGGGCGGAGATTTCTGGAAGATGCCAGGAAGATACTTA  
ACAGGGAAGTGAGAGGGCCGCGGCAAAGCCGTTTTTCCATAGGCTCCGCCCCC  
CTGACAAGCATCACGAAATCTGACGCTCAAATCAGTGGTGGCGAAACCCGACA  
GGACTATAAAGATACCAGGCGTTTTCCCCTGGCGGCTCCCTCGTGCGCTCTCCT  
GTTCTGCTTTTCGGTTTACCGGTGTCATTCCGCTGTTATGGCCGCGTTTGTCT  
CATTCCACGCCTGACACTCAGTTCCGGGTAGGCAGTTCGCTCCAAGCTGGACT  
GTATGCACGAACCCCCGTTTCACTCCGACCGCTGCGCCTTATCCGGTAACTATC  
GTCTTGAGTCCAACCCGAAAGACATGCAAAGCACCACTGGCAGCAGCCACT  
GGTAATTGATTTAGAGGAGTTAGTCTTGAAGTCATGCGCCGGTTAAGGCTAAAC  
TGAAAGGACAAGTTTTGGTGACTGCGCTCCTCCAAGCCAGTTACCTCGGTTCAA  
AGAGTTGGTAGCTCAGAGAACCTTCGAAAAACCGCCCTGCAAGGCGGTTTTTTC  
GTTTTCAGAGCAAGAGATTACGCGCAGACCAAACGATCTCAAGAAGATCATCT  
TATTAATCAGATAAAATATTTCTAGATTTTCAAGTGAATTTATCTCTTCAAATGTAG  
CACCTGAAGTCAGCCCCATACGATATAAGTTGTAATTCTCATGTTTGACAGCTTA  
TCATCGATAAGCTTTAATGCGGTAGTTTATCACAGTTAAATTGCTAACGCAGTCA  
GGCACCGTGTATGAAATCTAACAATGCGCTCATCGTCATCCTCGGCACCGTCAC  
CCTGGATGCTGTAGGCATAGGCTTGGTTATGCCGGTACTGCCGGGCTCTTGC  
GGGATTACGAAATCATCCTGTGGAGCTTAGTAGGTTTAGCAAGATGGCAGCGCC  
TAAATGTAGAATGATAAAAGGATTAAGAGATTAATTTCCCTAAAATGATAAAACA  
AGCGTTTTGAAAGCGCTTGTTTTTTTGGTTTGCAGTCAGAGTAGAATAGAAGTAT  
CAAAAAAGCACCGACTCGGTGCCACTTTTTCAAGTTGATAACGGACTAGCCTT

ATTTAACTTGCTATGCTGTTTTGAATGGTTCCAACAAGATTATTTTATAACTTTTA  
TAACAAATAATCAAGGAGAAATTCAAAGAAATTTATCAGCCATAAAACAATACTTA  
ATACTATAGAATGATAACAAAATAAACTACTTTTTAAAAGAATTTTGTGTTATAATC  
TATTTATTATTAAGTATTGGGTAATATTTTTTTGAAGAGATATTTTGAAAAAGAAAA  
TTAAAGCATATTAACATAATTCGGAGGTCATTAAACTATTATTGAAATCATCAA  
ACTCATTATGGATTTAATTTAACTTTTTATTTTAGGAGGCAAAAATGGATAAGAA  
ATACTCAATAGGCTTAGCTATCGGCACAAATAGCGTCGGATGGGCGGTGATCAC  
TGATGAATATAAGGTTCCGTCTAAAAGTTCAAGGTTCTGGGAAATACAGACCG  
CCACAGTATCAAAAAAATCTTATAGGGGCTCTTTTATTTGACAGTGGAGAGACA  
GCGGAAGCGACTCGTCTCAAACGGACAGCTCGTAGAAGGTATACACGTCGGAA  
GAATCGTATTTGTTATCTACAGGAGATTTTTTCAAATGAGATGGCGAAAGTAGAT  
GATAGTTTCTTTCATCGACTTGAAGAGTCTTTTTTGGTGGAAGAAGACAAGAAGC  
ATGAACGTCATCCTATTTTTGGAAATATAGTAGATGAAGTTGCTTATCATGAGAA  
ATATCCAATCTATCATCTGCGAAAAAATTGGTAGATTCTACTGATAAAGCG  
GATTTGCGCTTAATCTATTTGGCCTTAGCGCATATGATTAAGTTTCGTGGTCATT  
TTTTGATTGAGGGAGATTTAAATCCTGATAATAGTGATGTGGACAACTATTTAT  
CCAGTTGGTACAAACCTACAATCAATTATTTGAAGAAAACCTATTAACGCAAGT  
GGAGTAGATGCTAAAGCGATTCTTCTGCACGATTGAGTAAATCAAGACGATTA  
GAAAATCTCATTGCTCAGCTCCCCGGTGAGAAGAAAAATGGCTTATTTGGGAAT  
CTCATTGCTTTGTCATTGGGTTTGACCCCTAATTTTAAATCAAATTTTGATTTGGC  
AGAAGATGCTAAATTACAGCTTTCAAAAGATACTTACGATGATGATTTAGATAATT  
TATTGGCGCAAATTGGAGATCAATATGCTGATTTGTTTTTGGCAGCTAAGAATTT  
ATCAGATGCTATTTTACTTTCAGATATCCTAAGAGTAAATACTGAAATAACTAAGG  
CTCCCCTATCAGCTTCAATGATTAACGCTACGATGAACATCATCAAGACTTGAC  
TCTTTTAAAAGCTTTAGTTCGACAACAACCTCCAGAAAAGTATAAAGAAATCTTTT  
TTGATCAATCAAAAAACGGATATGCAGGTTATATTGATGGGGGAGCTAGCCAAG  
AGAATTTTATAAATTTATCAAACCAATTTTAGAAAAAATGGATGGTACTGAGGAA  
TTATTGGTGAACTAAATCGTGAAGATTTGCTGCGCAAGCAACGGACCTTTGAC  
AACGGCTCTATTCCCATCAAATTCACCTGGGTGAGCTGCATGCTATTTTGAGAA  
GACAAGAAGACTTTTATCCATTTTTAAAAGACAATCGTGAGAAGATTGAAAAAAT  
CTTGACTTTTTCGAATTCCTTATTATGTTGGTCCATTGGCGCGTGGCAATAGTCGT  
TTTGCATGGATGACTCGGAAGTCTGAAGAAACAATTACCCCATGGAATTTTGAAG  
AAGTTGTCGATAAAGGTGCTTCAGCTCAATCATTTATTGAACGCATGACAACTT  
TGATAAAAATCTTCAAATGAAAAAGTACTACCAAACATAGTTTGCTTTATGAGT  
ATTTTACGGTTTATAACGAATTGACAAAGGTCAAATATGTTACTGAAGGAATGCG  
AAAACCAGCATTTCCTTTCAGGTGAACAGAAGAAAGCCATTGTTGATTTACTCTTC  
AAAACAAATCGAAAAGTAACCGTTAAGCAATTAAGAAGATTATTTCAAAAAAAT  
AGAATGTTTTGATAGTGTGAAATTTCAAGGAGTTGAAGATAGATTTAATGCTTCAT  
TAGGTACCTACCATGATTTGCTAAAATTATTAAGATAAAGATTTTTTGGATAAT  
GAAGAAAATGAAGATATCTTAGAGGATATTGTTTTAACATTGACCTTATTTGAAGA  
TAGGGAGATGATTGAGGAAAGACTTAAAACATATGCTCACCTCTTTGATGATAAG  
GTGATGAAACAGCTTAAACGTCGCCGTTATACTGGTTGGGGACGTTTGTCTCGA  
AAATTGATTAATGGTATTAGGGATAAGCAATCTGGCAAACAATATTAGATTTTTT  
GAAATCAGATGGTTTTGCCAATCGCAATTTTATGCAGCTGATCCATGATGATAGT



TTGACATTTAAAGAAGACATTCAAAAAGCACAAGTGTCTGGACAAGGCGATAGTT  
TACATGAACATATTGCAAATTTAGCTGGTAGCCCTGCTATTA AAAAAGGTATTTTA  
CAGACTGTAAAAGTTGTTGATGAATTGGTCAAAGTAATGGGGCGGCATAAGCCA  
GAAAATATCGTTATTGAAATGGCACGTGAAAATCAGACAACCTCAAAGGGCCAG  
AAAAATTCGCGAGAGCGTATGAAACGAATCGAAGAAGGTATCAAAGAATTAGGA  
AGTCAGATTCTTAAAGAGCATCCTGTTGAAAATACTCAATTGCAAATGAAAAGC  
TCTATCTCTATTATCTCCAAAATGGAAGAGACATGTATGTGGACCAAGAATTAGA  
TATTAATCGTTTAAAGTGATTATGATGTGCGATGCCATTGTTCCACAAAGTTTCCTTA  
AAGACGATTCAATAGACAATAAGGTCTTAACGCGTTCTGATAAAAATCGTGGTAA  
ATCGGATAACGTTCCAAGTGAAGAAGTAGTCAAAAAGATGAAAACCTATTGGAG  
ACAACTTCTAAACGCCAAGTTAATCACTCAACGTAAGTTTGATAATTTAACGAAA  
GCTGAACGTGGAGGTTTGAGTGAACCTTGATAAAGCTGGTTTTATCAAACGCCAA  
TTGGTTGAAACTCGCCAAATCACTAAGCATGTGGCACAAATTTTGGATAGTCGCA  
TGAATACTAAATACGATGAAAATGATAAACTTATTTCGAGAGGTTAAAGTGATTAC  
CTTAAAATCTAAATTAGTTTCTGACTTCCGAAAAGATTTCCAATTCTATAAAGTAC  
GTGAGATTAACAATTACCATCATGCCCATGATGCGTATCTAAATGCCGTCGTTGG  
AACTGCTTTGATTAAGAAATATCCAAAACCTTGAATCGGAGTTTGTCTATGGTGAT  
TATAAAGTTTATGATGTTGTAATAATGATTGCTAAGTCTGAGCAAGAAATAGGCA  
AAGCAACCGCAAATATTTCTTTTACTCTAATATCATGAACTTCTTCAAACAGAA  
ATTACACTTGCAAATGGAGAGATTTCGCAAACGCCCTCTAATCGAAACTAATGGG  
GAAACTGGAGAAATTGTCTGGGATAAAGGGCGAGATTTTGCCACAGTGCGCAA  
GTATTGTCCATGCCCAAGTCAATATTGTCAAGAAAACAGAAGTACAGACAGGC  
GGATTCTCCAAGGAGTCAATTTTACCAAAAAGAAATTCGGACAAGCTTATTGCTC  
GTAAAAAAGACTGGGATCCAAAAAATATGGTGGTTTTGATAGTCCAACGGTAG  
CTTATTCAGTCCTAGTGGTTGCTAAGGTGGAAAAAGGGAAATCGAAGAAGTTAA  
AATCCGTTAAAGAGTTACTAGGGATCACAATTATGGAAAGAAGTTCCTTTGAAAA  
AAATCCGATTGACTTTTTAGAAAGCTAAAGGATATAAGGAAGTTAAAAAAGACTTA  
ATCATTAAACTACCTAAATATAGTCTTTTTGAGTTAGAAAACGGTTCGTAAACGGA  
TGCTGGCTAGTGCCGGAGAATTACAAAAGGAAATGAGCTGGCTCTGCCAAGC  
AAATATGTGAATTTTTTATATTTAGCTAGTCATTATGAAAAGTTGAAGGGTAGTCC  
AGAAGATAACGAACAAAAACAATTGTTTGTGGAGCAGCATAAGCATTATTTAGAT  
GAGATTATTGAGCAAATCAGTGAATTTTCTAAGCGTGTTATTTTAGCAGATGCCA  
ATTTAGATAAAGTTCTTAGTGCATATAACAAACATAGAGACAAACCAATACGTGA  
ACAAGCAGAAAATATTATTCATTTATTTACGTTGACGAATCTTGGAGCTCCCGCT  
GCTTTTAAATATTTTGATACAACAATTGATCGTAAACGATATACGTCTACAAAAGA  
AGTTTTAGATGCCACTCTTATCCATCAATCCATCACTGGTCTTTATGAAACACGC  
ATTGATTTGAGTCAGCTAGGAGGTGACTGAAGTATATTTTAGATGAAGATTATTT  
CTTAATAACTAAAAATATGGTATAATACTCTTAATAAATGCAGTAATACAGGGGCT  
TTCAAGACTGAAGTCTAGCTGAGACAAATAGTGCGATTACGAAATTTTTTAGAC  
AAAAATAGTCTACGAGGTTTTAGAGCTATGCTGTTTTGAATGGTCCCAAACCTGA  
GACCAGTCTCGGAAGCTCAAAGGTCTCGTTTTAGAGCTATGCTGTTTTGAATGG  
TCCCAAACCTCAGCACACTGAGACTTGTTGAGTTCCATGTTTTAGAGCTATGCT  
GTTTTGAATGGACTCCATTCAACATTGCCGATGATAACTTGAGAAAGAGGGTTAA  
TACCAGCAGTCGGATACCTTCTATTCTTTCTGTTAAAGCGTTTTTCATGTTATAAT

AGGCAAAGAAGAGTAGTGTGATCGTCCATTCCGACAGCATCGCCAGTCACTAT  
GGCGTGCTGCTAGCGCTATATGCGTTGATGCAATTTCTATGCGCACCCGTTCTC  
GGAGCACTGTCCGACCGCTTTGGCCGCCGCCAGTCCTGCTCGCTTCGCTACT  
TGGAGCCACTATCGACTACGCGATCATGGCGACCACACCCGTCCTGTGGATCC  
TCTACGCCGGACGCATCGTGGCCGGCATCACCGGCGCCACAGGTGCGGTTGCT  
GGCGCCTATATCGCCGACATCACCGATGGGGAAGATCGGGCTCGCCACTTCGG  
GCTCATGAGCGCTTGTTCGGCGTGGGTATGGTGGCAGGCCCCCGTGGCCGGG  
GGACTGTTGGGCGCCATCTCCTTGCATGCACCATTCTTGCGGCGGCGGTGCT  
CAACGGCCTCAACCTACTACTGGGCTGCTTCCTAATGCAGGAGTCGCATAAGGG  
AGAGCGTCGACCGATGCCCTTGAGAGCCTTCAACCCAGTCAGTCTCTTCGGT  
GGGCGCGGGGCATGACTATCGTCGCCGCACTTATGACTGTCTTCTTTATCATGC  
AACTCGTAGGACAGGTGCCGGCAGCGCTCTGGGTCAATTTTCGGCGAGGACCGC  
TTTCGCTGGAGCGCGACGATGATCGGCCTGTCGCTTGCGGTATTCGGAATCTTG  
CACGCCCTCGCTCAAGCCTTCGTCACTGGTCCC GCCACCAAACGTTTCGGCGA  
GAAGCAGGCCATTATCGCCGGCATGGCGGCCGACGCGCTGGGCTACGTCTTG  
TGGCGTTCGCGACGCGAGGCTGGATGGCCTTCCCCATTATGATTCTTCTCGCTT  
CCGGCGGCATCGGGATGCCCGCGTTGCAGGCCATGCTGTCCAGGCAGGTAGA  
TGACGACCATCAGGGACAGCTTCAAGGATCGCTCGCGGCTCTTACCAGCCTAA  
CTTCGATCATTGGACCGCTGATCGTCACGGCGATTTATGCCGCCTCGGCGAGC  
ACATGGAACGGGTTGGCATGGATTGTAGGCGCCGCCCTATACCTTGTCTGCCTC  
CCCGCGTTGCGTCGCGGTGCATGGAGCCGGGCCACCTCGACCTGAATGGAAG  
CCGGCGGCACCTCGCTAACGGATTCACCACTCCAAGAATTGGAGCCAATCAATT  
CTTGCGGAGAACTGTGAATGCGCAAACCAACCCTTGGCAGAACATATCCATCGC  
GTCCGCCATCTCCAGCAGCCGCACGCGGGCGCATCTCGGGCAGCGTTGGGTCT  
GGCCACGGGTGCGCATGATCGTGCTCCTGTGCTTGGAGACCCGGCTAGGCTGG  
CGGGGTTGCCTTACTGGTTAGCAGAATGAATCACCGATACGCGAGCGAACGTG  
AAGCGACTGCTGCTGCAAAACGTCTGCGACCTGAGCAACAACATGAATGGTCTT  
CGGTTTCCGTGTTTCGTAAAGTCTGGAAACGCGGAAGTCCCCTACGTGCTGCTG  
AAGTTGCCCGCAACAGAGAGTGAACCAACCGGTGATACCACGATACTATGACT  
GAGAGTCAACGCCATGAGCGGCCTCATTTCTTATTCTGAGTTACAACAGTCCGC  
ACCGCTGTCCGGTAGCTCCTTCCGGTGGGCGCGGGGCATGACTATCGTCGCCG  
CACTTATGACTGTCTTCTTTATCATGCAACTCGTAGGACAGGTGCCGGCAGCGC  
CCAACAGTCCCCCGGCCACGGGGCCTGCCACCATACCACGCCGAAACAAGC  
GCCCTGCACCATTATGTTCCGGATCTGCATCGCAGGATGCTGCTGGCTACCCTG  
TGGAACACCTACATCTGTATTAACGAAGCGCTAACCGTTTTTTATCAGGCTCTGG  
GAGGCAGAATAAATGATCATATCGTCAATTATTACCTCCACGGGGAGAGCCTGA  
GCAAACCTGGCCTCAGGCATTTGAGAAGCACACGGTCACACTGCTTCCGGTAGTC  
AATAAACCGGTAAACCAGCAATAGACATAAGCGGCTATTTAACGACCCTGCCCT  
GAACCGACGACCGGGTTCGAATTTGCTTTTCGAATTTCTGCCATTCATCCGCTTATT  
ATCACTTATTCAGGCGTAGCACCAGGCGTTTAAGGGCACCAATAACTGCCTTAA  
AAAATTACGCCCCGCCCTGCCACTCATCGCAGTACTGTTGTAATTCATTAAGCA  
TTCTGCCGACATGGAAGCCATCACAGACGGCATGATGAACCTGAATCGCCAGC  
GGCATCAGCACCTTGTGCGCTTGCGTATAATATTTGCCCATGGTGAAAACGGGG  
CGGAAGAAGTTGTCCATATTGGCCACGTTTAAATCAAACCTGGTGAAACTCACC

CAGGGATTGGCTGAGACGAAAAACATATTCTCAATAAACCCCTTTAGGGAAATAG  
GCCAGGTTTTACCGTAACACGCCACATCTTGCGAATATATGTGTAGAACTGC  
CGGAAATCGTCGTGGTATTCCTCCAGAGCGATGAAAACGTTTCAGTTTGCTCA  
TGGAACCGGTGTAACAAGGGTGAACACTATCCCATATCACCAGCTCACCGTCT  
TTCATTGCCATACG

pRC2302

GAATTCCGGATGAGCATTTCATCAGGCGGGCAAGAATGTGAATAAAGGCCGGAT  
AAAACCTTGCTTATTTTTCTTTACGGTCTTTAAAAAGGCCGTAATATCCAGCTGA  
ACGGTCTGGTTATAGGTACATTGAGCAACTGACTGAAATGCCTCAAAATGTTCTT  
TACGATGCCATTGGGATATATCAACGGTGGTATATCCAGTGATTTTTTTCTCCAT  
TTAGCTTCCTTAGCTCCTGAAAATCTCGATAACTCAAAAATACGCCCGGTAGT  
GATCTTATTTTATTATGGTGAAAGTTGGAACCTCTTACGTGCCGATCAACGTCTC  
ATTTTCGCCAAAAGTTGGCCCAGGGCTTCCCGGTATCAACAGGGACACCAGGAT  
TTATTTATTCTGCGAAGTGATCTTCCGTCACAGGTATTTATTCGGCGCAAAGTGC  
GTCGGGTGATGCTGCCAACTTACTGATTTAGTGTATGATGGTGTTTTTGAGGTG  
CTCCAGTGGCTTCTGTTTTCTATCAGCTGTCCCTCCTGTTTCAGCTACTGACGGGG  
TGGTGC GTAACGGCAAAGCACCGCCGGACATCAGCGCTAGCGGAGTGTATAC  
TGGCTTACTATGTTGGCACTGATGAGGGTGTCAAGTGAAGTGCTTCATGTGGCAG  
GAGAAAAAAGGCTGCACCGGTGCGTCAGCAGAATATGTGATACAGGATATATTC  
CGCTTCCTCGCTCACTGACTCGCTACGCTCGGTGCTTCGACTGCGGCGAGCGG  
AAATGGCTTACGAACGGGGCGGAGATTTCTGGAAGATGCCAGGAAGATACTTA  
ACAGGGAAGTGAGAGGGCCGCGCAAAGCCGTTTTTCCATAGGCTCCGCCCCC  
CTGACAAGCATCACGAAATCTGACGCTCAAATCAGTGGTGGCGAAACCCGACA  
GGACTATAAAGATACCAGGCGTTTTCCCCTGGCGGCTCCCTCGTGCGCTCTCCT  
GTTCTGCTTTTCGGTTTACCGGTGTCATTCCGCTGTTATGGCCGCGTTTGTCT  
CATTCCACGCCTGACACTCAGTTCCGGGTAGGCAGTTCGCTCCAAGCTGGACT  
GTATGCACGAACCCCCGTTTCAAGTCCGACCGCTGCGCCTTATCCGGTAACTATC  
GTCTTGAGTCCAACCCGGAAGACATGCAAAGCACCACTGGCAGCAGCCACT  
GGTAATTGATTTAGAGGAGTTAGTCTTGAAGTCATGCGCCGGTTAAGGCTAAC  
TGAAAGGACAAGTTTTGGTGACTGCGCTCCTCCAAGCCAGTTACCTCGGTTCAA  
AGAGTTGGTAGCTCAGAGAACCCTTCGAAAACCGCCCTGCAAGGCGGTTTTTTC  
GTTTTCAGAGCAAGAGATTACGCGCAGACCAAACGATCTCAAGAAGATCATCT  
TATTAATCAGATAAAATATTTCTAGATTTCAAGTGAATTTATCTCTTCAAATGTAG  
CACCTGAAGTCAGCCCCATACGATATAAGTTGTAATTCTCATGTTTGACAGCTTA  
TCATCGATAAGCTTTAATGCGGTAGTTTATCACAGTTAAATTGCTAACGCAGTCA  
GGCACCGTGTATGAAATCTAACAATGCGCTCATCGTCATCCTCGGCACCGTAC  
CCTGGATGCTGTAGGCATAGGCTTGGTTATGCCGGTACTGCCGGGCTCTTGC  
GGGATTACGAAATCATCCTGTGGAGCTTAGTAGGTTTAGCAAGATGGCAGCGCC  
TAAATGTAGAATGATAAAAGGATTAAGAGATTAATTTCCCTAAAAATGATAAAACA  
AGCGTTTTGAAAGCGCTTGTTTTTTTGGTTTGCAGTCAGAGTAGAATAGAAGTAT  
CAAAAAAAGCACCGACTCGGTGCCACTTTTTCAAGTTGATAACGGACTAGCCTT  
ATTTAACTTGCTATGCTGTTTTGAATGGTTCCAACAAGATTATTTTATAACTTTTA

TAACAAATAATCAAGGAGAAATTCAAAGAAATTTATCAGCCATAAAACAATACTTA  
ATACTATAGAATGATAACAAAATAAACTACTTTTTAAAAGAATTTTGTGTTATAATC  
TATTTATTATTAAGTATTGGGTAATATTTTTGAAGAGATATTTGAAAAAGAAAA  
TTAAAGCATATTAACATAATTTTCGGAGGTCATTAAACTATTATTGAAATCATCAA  
ACTCATGCATCATATGGAAATGATGCTCGATAAGAAACAGATTTCGTGCGATCTTT  
CTCTTTGAGTTTAAAATGGGTTCGCAAAGCGGCGGAGACGACGCGTAATATTAAC  
AACGCGTTCGGTCCTGGCACCGCGAACGAGCGTACCGTGCAATGGTGGTTCAA  
AAAGTTTCGCAAAGGCGACGAATCTCTGGAGGACGAAGAGCGTTCTGGCCGCC  
CGTCCGAGGTTGACAACGACCAGCTGCGTGCAATCATCGAAGCTGATCCGCTG  
ACTACCACCCGCGAAGTTGCTGAAGAACTGAATGTGGATCACTCTACTGTGGTT  
CGCCACCTGAAACAGATCGGTAAAGTAAAAAACTGGACAAATGGGTTCCTCAT  
GAACTGTCTGAAAACCAGAAAAACCGTCGTTTTGAAGTTAGCTCCTCTCTGATTC  
TGCGTAACAACAACGAACCGTTCCTGGATCGTATCGTAACCTGTGATGAGAAAT  
GGATTCTGTATGATAACCGTCGCCGCTCTGCTCAGTGGCTGGATCGCGAAGAA  
GCTCCAAAACACTTCCCGAAACCGAATCTGCACCAGAAGAAAGTCATGGTAACC  
GTATGGTGGTCTGCCGCAGGTGTTATCCACTATTCCTTCCTGAACCCGGGCGAA  
ACTATCACCAGCGAAAAATACTGCCAGCAGATTGACGAAATGCACCGTAAACTG  
CAGCGTCTGCAGCCAGCACTGGTGAATCGTAAAGGTCCGATCCTGCTGCATGAT  
AACGCCCGTCCGCACGTTGCCCAACCGACCCTGCAGAACTGAACGAACTGGG  
CTATGAAGTTCTGCCACACCCGCGTACTCCCCGGATCTGTCCCCGACTGACTA  
CCATTTCTTCAAGCATCTGGACAACCTCCTGCAGGGTAAACGTTTTTACAACCAA  
CAGGACGCAGAAAACGCTTTCCAGGAGTTCGTTCGAAAGCCGTTCCACTGACTTC  
TACGCGACCGGTATCAACAAGCTGATCAGCCGTTGGCAGAAATGCGTGGACTG  
TAACGGCAGCTACTTCGATtctagaGGAGGTGGCTCAGAAGGTGGCGGATCTGAA  
GGTGGCTCTGGAactagtATGAGCGATAAAATTATTCACCTGACTGACGACAGTTT  
TGACACGGATGTACTCAAAGCGGACGGGGCGATCCTCGTCGATTTCTGGGCAG  
AGTGGTGCGGTCCGTGCAAATGATCGCCCCGATTCTGGATGAAATCGCTGAC  
GAATATCAGGGCAAACCTGACCGTTGCAAACCTGAACATCGATCAAACCCCTGGC  
ACTGCGCCGAAATATGGCATCCGTGGTATCCCGACTCTGCTGCTGTTCAAAAAC  
GGTGAAGTGGCGGCAACCAAAGTGGGTGCACTGTCTAAAGGTGAGTTGAAAGA  
GTTCTCGACGCTAACCTGGCCGGTTCTGGTTCTGGCCATATGCACCATCATCA  
TCATCATTCTTCTGGTCTGGTGCCACGCGGTTCTGGTATGAAAGAAACCGCTGC  
TGCTAAATTCGAACGCCAGCACATGGACAGCCCAGATCTGGGTACCGACGACG  
ACGACAAGGCCATGGCTGATATCCTCGAGATGGATAAGAAATACTCAATAGGCT  
TAGCTATCGGCACAAATAGCGTCGGATGGGCGGTGATCACTGATGAATATAAGG  
TTCCGTCTAAAAGTTCAAGGTTCTGGGAAATACAGACCGCCACAGTATCAAAA  
AAAATCTTATAGGGGCTCTTTATTTGACAGTGGAGAGACAGCGGAAGCGACTC  
GTCTCAAACGGACAGCTCGTAGAAGGTATACACGTCGGAAGAATCGTATTTGTT  
ATCTACAGGAGATTTTTTCAAATGAGATGGCGAAAGTAGATGATAGTTTCTTTCA  
TCGACTTGAAGAGTCTTTTTTGGTGGAAAGAAGACAAGAAGCATGAACGTCATCC  
TATTTTTGGAAATATAGTAGATGAAGTTGCTTATCATGAGAAATATCCAACATCT  
ATCATCTGCGAAAAAATTGGTAGATTCTACTGATAAAGCGGATTTGCGCTTAAT  
CTATTTGGCCTTAGCGCATATGATTAAGTTTCGTGGTCATTTTTTATTGAGGGA  
GATTTAAATCCTGATAATAGTGATGTGGACAACTATTTATCCAGTTGGTACAAA

CCTACAATCAATTATTTGAAGAAAACCCTATTAACGCAAGTGGAGTAGATGCTAA  
AGCGATTCTTTCTGCACGATTGAGTAAATCAAGACGATTAGAAAATCTCATTGCT  
CAGCTCCCCGGTGAGAAGAAAAATGGCTTATTTGGGAATCTCATTGCTTTGTCAT  
TGGGTTTGACCCCTAATTTTAAATCAAATTTTGATTTGGCAGAAGATGCTAAATTA  
CAGCTTTCAAAGATACTTACGATGATGATTTAGATAATTTATTGGCGCAAATTG  
GAGATCAATATGCTGATTTGTTTTGGCAGCTAAGAATTTATCAGATGCTATTTTA  
CTTTCAGATATCCTAAGAGTAAATACTGAAATAACTAAGGCTCCCCTATCAGCTT  
CAATGATTAACGCTACGATGAACATCATCAAGACTTGACTCTTTTAAAAGCTTT  
AGTTGACAACAACCTCCAGAAAAGTATAAAGAAATCTTTTTTGATCAATCAAAAA  
ACGGATATGCAGGTTATATTGATGGGGGAGCTAGCCAAGAAGAATTTTATAAATT  
TATCAAACCAATTTTAGAAAAAATGGATGGTACTGAGGAATTATTGGTGAAACTA  
AATCGTGAAGATTTGCTGCGCAAGCAACGGACCTTTGACAACGGCTCTATTCCC  
CATCAAATTCACTTGGGTGAGCTGCATGCTATTTTGAGAAGACAAGAAGACTTTT  
ATCCATTTTTAAAAGACAATCGTGAGAAGATTGAAAAAATCTTGACTTTTCGAATT  
CCTTATTATGTTGGTCCATTGGCGCGTGGCAATAGTCGTTTTGCATGGATGACT  
CGGAAGTCTGAAGAAACAATTACCCCATGGAATTTTGAAGAAGTTGTCGATAAA  
GGTGCTTCAGCTCAATCATTTATTGAACGCATGACAACTTTGATAAAAATCTTC  
CAAATGAAAAAGTACTACCAAACATAGTTTGCTTTATGAGTATTTTACGGTTTAT  
AACGAATTGACAAAGGTCAAATATGTTACTGAAGGAATGCGAAAACCAGCATTTC  
TTTCAGGTGAACAGAAGAAAGCCATTGTTGATTTACTCTTCAAACAAATCGAAA  
AGTAACCGTTAAGCAATTAAGAAGATTATTTCAAAAAAATAGAATGTTTTGATA  
GTGTTGAAATTCAGGAGTTGAAGATAGATTTAATGCTTCATTAGGTACCTACCA  
TGATTTGCTAAAAATTATTAAGATAAAGATTTTTTGGATAATGAAGAAAATGAAG  
ATATCTTAGAGGATATTGTTTTAACATTGACCTTATTTGAAGATAGGGAGATGATT  
GAGGAAAGACTTAAAACATATGCTCACCTCTTTGATGATAAGGTGATGAAACAG  
CTTAAACGTCGCCGTTATACTGGTTGGGGACGTTTGTCTCGAAAATTGATTAATG  
GTATTAGGGATAAGCAATCTGGCAAACAATATTAGATTTTTTGAATCAGATGG  
TTTTGCCAATCGCAATTTTATGCAGCTGATCCATGATGATAGTTTGACATTTAAA  
GAAGACATTCAAAAAGCACAAGTGTCTGGACAAGGCGATAGTTTACATGAACAT  
ATTGCAAATTTAGCTGGTAGCCCTGCTATTA AAAAAGGTATTTTACAGACTGTAA  
AAGTTGTTGATGAATTGGTCAAAGTAATGGGGCGGCATAAGCCAGAAAATATCG  
TTATTGAAATGGCACGTGAAAATCAGACAACCTCAAAGGGCCAGAAAATTCGC  
GAGAGCGTATGAAACGAATCGAAGAAGGTATCAAAGAATTAGGAAGTCAGATTC  
TTAAAGAGCATCCTGTTGAAAATACTCAATTGCAAATGAAAAGCTCTATCTCTAT  
TATCTCCAAAATGGAAGAGACATGTATGTGGACCAAGAATTAGATATTAATCGTT  
TAAGTGATTATGATGTCGATGCCATTGTTCCACAAAGTTTCCTTAAAGACGATTC  
AATAGACAATAAGGTCTTAACGCGTTCTGATAAAAATCGTGGTAAATCGGATAAC  
GTTCCAAGTGAAGAAGTAGTCAAAAAGATGAAAAACTATTGGAGACAACCTTCTAA  
ACGCCAAGTTAATCACTCAACGTAAGTTTGATAATTTAACGAAAGCTGAACGTGG  
AGGTTTGAGTGAACCTTGATAAAGCTGGTTTTATCAAACGCCAATTGGTTGAACT  
CGCCAAATCACTAAGCATGTGGCACAAATTTTGGATAGTCGCATGAATACTAAAT  
ACGATGAAAATGATAAACTTATTTCGAGAGGTTAAAGTGATTACCTTAAAATCTAA  
ATTAGTTTCTGACTTCCGAAAAGATTTCCAATTCTATAAAGTACGTGAGATTAACA  
ATTACCATCATGCCCATGATGCGTATCTAAATGCCGTCGTTGGAAGTCTTTGAT

TAAGAAATATCCAAAACCTTGAATCGGAGTTTGTCTATGGTGATTATAAAGTTTATG  
ATGTTTCGTAAAATGATTGCTAAGTCTGAGCAAGAAATAGGCAAAGCAACCGCAA  
AATATTTCTTTTACTCTAATATCATGAACCTTCTTCAAACAGAAATTACACTTGCA  
AATGGAGAGATTTCGCAAACGCCCTCTAATCGAAACTAATGGGGAAACTGGAGAA  
ATTGTCTGGGATAAAGGGCGAGATTTTGCCACAGTGCGCAAAGTATTGTCCATG  
CCCCAAGTCAATATTGTCAAGAAAACAGAAGTACAGACAGGCGGATTCTCCAAG  
GAGTCAATTTTACCAAAAAGAAATTCGGACAAGCTTATTGCTCGTAAAAAAGACT  
GGGATCCAAAAAATATGGTGGTTTTGATAGTCCAACGGTAGCTTATTCAGTCCT  
AGTGGTTGCTAAGGTGGAAAAAGGGAAATCGAAGAAGTTAAAATCCGTTAAAGA  
GTTACTAGGGATCACAATTATGGAAAGAAGTTCCTTTGAAAAAATCCGATTGAC  
TTTTTAGAAGCTAAAGGATATAAGGAAGTAAAAAAGACTTAATCATTAACTACC  
TAAATATAGTCTTTTTGAGTTAGAAAACGGTCGTAAACGGATGCTGGCTAGTGCC  
GGAGAATTACAAAAGGAAATGAGCTGGCTCTGCCAAGCAAATATGTGAATTTTT  
TATATTTAGCTAGTCATTATGAAAAGTTGAAGGGTAGTCCAGAAGATAACGAACA  
AAAACAATTGTTGTGGAGCAGCATAAGCATTATTTAGATGAGATTATTGAGCAA  
ATCAGTGAATTTTCTAAGCGTGTTATTTTAGCAGATGCCAATTTAGATAAAGTTCT  
TAGTGCATATAACAAACATAGAGACAAACCAATACGTGAACAAGCAGAAAATATT  
ATTCATTTATTTACGTTGACGAATCTTGAGCTCCCGCTGCTTTTAAATATTTTGA  
TACAACAATTGATCGTAAACGATATACGTCTACAAAAGAAGTTTTAGATGCCACT  
CTTATCCATCAATCCATCACTGGTCTTTATGAAACACGCATTGATTTGAGTCAGC  
TAGGAGGTGACTGAAGTATATTTTAGATGAAGATTATTTCTTAATAACTAAAAATA  
TGGTATAATACTCTTAATAAATGCAGTAATACAGGGGCTTTTCAAGACTGAAGTC  
TAGCTGAGACAAATAGTGCGATTACGAAATTTTTTAGACAAAATAGTCTACGAG  
GTTTTAGAGCTATGCTGTTTTGAATGGTCCCAAACTGAGACCAGTCTCGGAAG  
CTCAAAGGTCTCGTTTTAGAGCTATGCTGTTTTGAATGGTCCCAAACTTCAGCA  
CACTGAGACTTGTTGAGTTCCATGTTTTAGAGCTATGCTGTTTTGAATGGACTCC  
ATCAACATTGCCGATGATAACTTGAGAAAGAGGGTTAATACCAGCAGTCGGAT  
ACCTTCCTATTCTTTCTGTTAAAGCGTTTTTCATGTTATAATAGGCAAAGAAGAGT  
AGTGTGATCGTCCATTCCGACAGCATCGCCAGTCACTATGGCGTGCTGCTAGCG  
CTATATGCGTTGATGCAATTTCTATGCGCACCCGTTCTCGGAGCACTGTCCGAC  
CGCTTTGGCCGCCGCCAGTCCTGCTCGCTTCGCTACTTGGAGCCACTATCGA  
CTACGCGATCATGGCGACCACCCCGTCCTGTGGATCCTCTACGCCGGACGCA  
TCGTGGCCGGCATCACCGGCCACAGGTGCGGTTGCTGGCGCCTATATCGCC  
GACATCACCGATGGGGAAGATCGGGCTCGCCACTTCGGGCTCATGAGCGCTTG  
TTTCGGCGTGGGTATGGTGGCAGGCCCGTGGCCGGGGGACTGTTGGGCGCC  
ATCTCCTTGCATGCACCATTCTTTCGGCGGGCGGTGCTCAACGGCCTCAACCTA  
CTACTGGGCTGCTTCTAATGCAGGAGTCGCATAAGGGAGAGCGTCGACCGAT  
GCCCTTGAGAGCCTTCAACCCAGTCAGCTCCTTCCGGTGGGCGCGGGGCATGA  
CTATCGTCGCCGCACTTATGACTGTCTTCTTTATCATGCAACTCGTAGGACAGGT  
GCCGGCAGCGCTCTGGGTCATTTTCGGCGAGGACCGCTTTCGCTGGAGCGCGA  
CGATGATCGGCCTGTCGCTTTCGGTATTCGGAATCTTGCACGCCCTCGCTCAAG  
CCTTCGTCACTGGTCCCGCCACCAAACGTTTCGGCGAGAAGCAGGCCATTATC  
GCCGGCATGGCGGCCGACGCGCTGGGCTACGTCTTGCTGGCGTTCGCGACGC  
GAGGCTGGATGGCCTTCCCATTATGATTCTTCTCGCTTCCGGCGGCATCGGGA

TGCCCCGCGTTGCAGGCCATGCTGTCCAGGCAGGTAGATGACGACCATCAGGGA  
CAGCTTCAAGGATCGCTCGCGGCTCTTACCAGCCTAACTTCGATCATTGGACCG  
CTGATCGTCACGGCGATTTATGCCGCCTCGGCGAGCACATGGAACGGGTTGGC  
ATGGATTGTAGGCGCCGCCCTATACCTTGTCTGCCTCCCCGCGTTGCGTTCGCG  
GTGCATGGAGCCGGGCCACCTCGACCTGAATGGAAGCCGGCGGCACCTCGCT  
AACGGATTCACCACTCCAAGAATTGGAGCCAATCAATTCTTGCGGAGAAGTGTG  
AATGCGCAAACCAACCCTTGGCAGAACATATCCATCGCGTCCGCCATCTCCAGC  
AGCCGCACGCGGCGCATCTCGGGCAGCGTTGGGTCCCTGGCCACGGGTGCGCA  
TGATCGTGCTCCTGTTCGTTGAGGACCCGGCTAGGCTGGCGGGGTTGCCTTACT  
GGTTAGCAGAATGAATCACCGATACGCGAGCGAACGTGAAGCGACTGCTGCTG  
CAAACGTCTGCGACCTGAGCAACAACATGAATGGTCTTCGGTTTCCGTGTTTC  
GTAAAGTCTGGAAACGCGGAAGTCCCCTACGTGCTGCTGAAGTTGCCCGCAAC  
AGAGAGTGGAAACCAACCGGTGATACCACGATACTATGACTGAGAGTCAACGCC  
ATGAGCGGCCTCATTCTTATTCTGAGTTACAACAGTCCGCACCGCTGTCCGGT  
AGCTCCTTCCGGTGGGCGCGGGGCATGACTATCGTCGCCGCACTTATGACTGT  
CTTCTTTATCATGCAACTCGTAGGACAGGTGCCGGCAGCGCCCAACAGTCCCCC  
GGCCACGGGGCCTGCCACCATACCCACGCCGAAACAAGCGCCCTGCACCATTA  
TGTTCCGGATCTGCATCGCAGGATGCTGCTGGCTACCCTGTGGAACACCTACAT  
CTGTATTAACGAAGCGCTAACCGTTTTTATCAGGCTCTGGGAGGCAGAATAAAT  
GATCATATCGTCAATTATTACCTCCACGGGGAGAGCCTGAGCAAAGTGGCCTCA  
GGCATTGAGAAGCACACGGTCACACTGCTTCCGGTAGTCAATAAACCGGTAAA  
CCAGCAATAGACATAAGCGGCTATTTAACGACCCTGCCCTGAACCGACGACCG  
GGTCGAATTTGCTTTTGAATTTCTGCCATTCATCCGCTTATTATCACTTATTCAGG  
CGTAGCACCAAGCGTTTAAAGGGCACCAATAACTGCCTTAAAAAAATTACGCCCC  
GCCCTGCCACTCATCGCAGTACTGTTGTAATTCATTAAGCATTCTGCCGACATG  
GAAGCCATCACAGACGGCATGATGAACCTGAATCGCCAGCGGCATCAGCACCT  
TGTCGCCTTGCGTATAATATTTGCCCATGGTGAAAACGGGGGCGAAGAAGTTGT  
CCATATTGGCCACGTTTAAATCAAACCTGGTGAAACTCACCCAGGGATTGGCTG  
AGACGAAAAACATATTCTCAATAAACCCTTTAGGGAAATAGGCCAGGTTTTTACC  
GTAACACGCCACATCTTGCGAATATATGTGTAGAAACTGCCGGAATCGTCGTG  
GTATTCACTCCAGAGCGATGAAAACGTTTCAGTTTGCTCATGAAAACGGTGTA  
ACAAGGGTGAACACTATCCCATATCACCAGCTCACCGTCTTTCATTGCCATACG

pRC2303

GAATTCCGGATGAGCATTTCATCAGGCGGGCAAGAATGTGAATAAAGGCCGGAT  
AAAACCTTGTGCTTATTTTTCTTTACGGTCTTTAAAAAGGCCGTAATATCCAGCTGA  
ACGGTCTGGTTATAGGTACATTGAGCAACTGACTGAAATGCCTCAAATGTTCTT  
TACGATGCCATTGGGATATATCAACGGTGGTATATCCAGTGATTTTTTTCTCCAT  
TTAGCTTCTTAGCTCCTGAAAATCTCGATAACTCAAAAAATACGCCCGGTAGT  
GATCTTATTTTATTATGGTGAAAGTTGGAACCTCTTACGTGCCGATCAACGTCTC  
ATTTTCGCCAAAAGTTGGCCCAGGGCTTCCCGGTATCAACAGGGACACCAGGAT  
TTATTTATTCTGCGAAGTGATCTTCCGTACAGGTATTTATTTCGGCGCAAAGTGC  
GTCGGGTGATGCTGCCAACTTACTGATTTAGTGTATGATGGTGTTTTTGAGGTG

CTCCAGTGGCTTCTGTTTCTATCAGCTGTCCCTCCTGTTTCAGCTACTGACGGGG  
TGGTGC GTAACGGCAAAGCACCGCCGGACATCAGCGCTAGCGGAGTGTATAC  
TGGCTTACTATGTTGGCACTGATGAGGGTGT CAGTGAAGTGCTTCATGTGGCAG  
GAGAAAAAAGGCTGCACCGGTGCGTCAGCAGAATATGTGATACAGGATATATTC  
CGCTTCCTCGCTCACTGACTCGCTACGCTCGGTTCGTTGACTGCGGCGAGCGG  
AAATGGCTTACGAACGGGGCGGAGATTTCTGGAAGATGCCAGGAAGATACTTA  
ACAGGGAAGTGAGAGGGGCCGCGGCAAAGCCGTTTTTCCATAGGCTCCGCCCCC  
CTGACAAGCATCACGAAATCTGACGCTCAAATCAGTGGTGGCGAAACCCGACA  
GGACTATAAAGATACCAGGCGTTTTCCCCTGGCGGCTCCCTCGTGCGCTCTCCT  
GTTCTGCTTTTCGGTTTACCGGTGTCATTCCGCTGTTATGGCCGCGTTTGTCT  
CATTCCACGCCTGACACTCAGTTCGCGGTAGGCAGTTCGCTCCAAGCTGGACT  
GTATGCACGAACCCCCCGTT CAGTCCGACCGCTGCGCCTTATCCGGTAACTATC  
GTCTTGAGTCCAACCCGGAAGACATGCAAAGCACCACTGGCAGCAGCCACT  
GGTAATTGATTTAGAGGAGTTAGTCTTGAAGTCATGCGCCGGTTAAGGCTAAAC  
TGAAAGGACAAGTTTTGGT GACTGCGCTCCTCCAAGCCAGTTACCTCGGTTCAA  
AGAGTTGGTAGCTCAGAGAACCTTCGAAAAACCGCCCTGCAAGGCGGTTTTTTC  
GTTTTCAGAGCAAGAGATTACGCGCAGACCAAACGATCTCAAGAAGATCATCT  
TATTAATCAGATAAAATATTTCTAGATTT CAGTGCAATTTATCTCTTCAAATGTAG  
CACCTGAAGTCAGCCCCATACGATATAAGTTGTAATTCTCATGTTTGACAGCTTA  
TCATCGATAAGCTTTAATGCGGTAGTTTATCACAGTTAAATTGCTAACGCAGTCA  
GGCACCGTGTATGAAATCTAACAATGCGCTCATCGTCATCCTCGGCACCGTCAC  
CCTGGATGCTGTAGGCATAGGCTTGGTTATGCCGGTACTGCCGGGCCTCTTGC  
GGGATTACGAAATCATCCTGTGGAGCTTAGTAGGTTTAGCAAGATGGCAGCGCC  
TAAATGTAGAATGATAAAAGGATTAAGAGATTAATTTCCCTAAAATGATAAAACA  
AGCGTTTTGAAAGCGCTTGTTTTTTTGGTTTGCAGTCAGAGTAGAATAGAAGTAT  
CAAAAAAGCACCGACTCGGTGCCACTTTTTCAAGTTGATAACGGACTAGCCTT  
ATTTAACTTGCTATGCTGTTTTGAATGGTTCCAACAAGATTATTTTATAACTTTTA  
TAACAAATAATCAAGGAGAAATTCAAAGAAATTTATCAGCCATAAAACAATACTTA  
ATACTATAGAATGATAACAAAATAAACTACTTTTTAAAAGAATTTTGTGTTATAATC  
TATTTATTATTAAGTATTGGGTAATATTTTTGAAGAGATATTTTAAAAAGAAAA  
TTAAAGCATATTAACCTAATTTCCGAGGTCATTAAACTATTATTGAAATCATCAA  
ACTCATTATGGATTTAATTTAACTTTTTATTTTAGGAGGCCAAAATGGATAAGAA  
ATACTCAATAGGCTTAGCTATCGGCACAAATAGCGTCGGATGGGCGGTGATCAC  
TGATGAATATAAGGTTCCGTCTAAAAGTTCAAGGTTCTGGGAAATACAGACCG  
CCACAGTATCAAAAAAATCTTATAGGGGCTCTTTTATTTGACAGTGGAGAGACA  
GCGGAAGCGACTCGTCTCAAACGGACAGCTCGTAGAAGGTATACACGTCCGAA  
GAATCGTATTTGTTATCTACAGGAGATTTTTCAAATGAGATGGCGAAAGTAGAT  
GATAGTTTCTTTCATCGACTTGAAGAGTCTTTTTTGGTGGGAAGAAGACAAGAAGC  
ATGAACGTCATCCTATTTTTGGAAATATAGTAGATGAAGTTGCTTATCATGAGAA  
ATATCCA ACTATCTATCATCTGCGAAAAAATTGGTAGATTCTACTGATAAAGCG  
GATTTGCGCTTAATCTATTTGGCCTTAGCGCATATGATTAAGTTTCGTGGTCATT  
TTTTGATTGAGGGAGATTTAAATCCTGATAATAGTGATGTGGACAACTATTTAT  
CCAGTTGGTACAAACCTACAATCAATTATTTGAAGAAAACCCTATTAACGCAAGT  
GGAGTAGATGCTAAAGCGATTCTTCTGCACGATTGAGTAAATCAAGACGATTA



GAAAATCTCATTGCTCAGCTCCCCGGTGAGAAGAAAAATGGCTTATTTGGGAAT  
CTCATTGCTTTGTCATTGGGTTTGACCCCTAATTTTAAATCAAATTTTGATTTGGC  
AGAAGATGCTAAATTACAGCTTTCAAAGATACTTACGATGATGATTTAGATAATT  
TATTGGCGCAAATTGGAGATCAATATGCTGATTTGTTTTTGGCAGCTAAGAATTT  
ATCAGATGCTATTTTACTTTTACAGATATCCTAAGAGTAAATACTGAAATAACTAAGG  
CTCCCCTATCAGCTTCAATGATTAACGCTACGATGAACATCATCAAGACTTGAC  
TCTTTTAAAAGCTTTAGTTTCGACAACAACCTCCAGAAAAGTATAAAGAAATCTTTT  
TTGATCAATCAAAAAACGGATATGCAGGTTATATTGATGGGGGAGCTAGCCAAG  
AAGAATTTTATAAATTTATCAAACCAATTTTAGAAAAAATGGATGGTACTGAGGAA  
TTATTGGTGAACTAAATCGTGAAGATTTGCTGCGCAAGCAACGGACCTTTGAC  
AACGGCTCTATTCCCATCAAATTCACCTGGGTGAGCTGCATGCTATTTTGAGAA  
GACAAGAAGACTTTTATCCATTTTAAAAGACAATCGTGAGAAGATTGAAAAAAT  
CTTGACTTTTTCGAATTCCTTATTATGTTGGTCCATTGGCGCGTGGCAATAGTCGT  
TTTGCATGGATGACTCGGAAGTCTGAAGAAACAATTACCCCATGGAATTTTGAAG  
AAGTTGTCGATAAAGGTGCTTCAGCTCAATCATTTATTGAACGCATGACAACTT  
TGATAAAAATCTTCAAATGAAAAAGTACTACCAAACATAGTTTGCTTTATGAGT  
ATTTTACGGTTTATAACGAATTGACAAAGGTCAAATATGTTACTGAAGGAATGCG  
AAAACCAGCATTTCCTTTCAGGTGAACAGAAGAAAGCCATTGTTGATTTACTCTTC  
AAAACAAATCGAAAAGTAACCGTTAAGCAATTAAGAAGATTATTTCAAAAAAAT  
AGAATGTTTTGATAGTGTGAAATTTCAAGGAGTTGAAGATAGATTTAATGCTTCAT  
TAGGTACCTACCATGATTTGCTAAAAATTATTAAGATAAAGATTTTTTGGATAAT  
GAAGAAAATGAAGATATCTTAGAGGATATTGTTTTAACATTGACCTTATTTGAAGA  
TAGGGAGATGATTGAGGAAAGACTTAAAACATATGCTCACCTCTTTGATGATAAG  
GTGATGAAACAGCTTAAACGTCGCCGTTATACTGGTTGGGGACGTTTGTCTCGA  
AAATTGATTAATGGTATTAGGGATAAGCAATCTGGCAAACAATATTAGATTTTTT  
GAAATCAGATGGTTTTGCCAATCGCAATTTTATGCAGCTGATCCATGATGATAGT  
TTGACATTTAAGAAGACATTCAAAAGCACAAAGTGTCTGGACAAGGCGATAGTT  
TACATGAACATATTGCAAATTTAGCTGGTAGCCCTGCTATTA AAAAAGGTATTTTA  
CAGACTGTAAAAGTTGTTGATGAATTGGTCAAAGTAATGGGGCGGCATAAGCCA  
GAAAATATCGTTATTGAAATGGCACGTGAAAATCAGACAACCTCAAAGGGCCAG  
AAAATTCGCGAGAGCGTATGAAACGAATCGAAGAAGGTATCAAAGAATTAGGA  
AGTCAGATTCTTAAAGAGCATCCTGTTGAAAATACTCAATTGCAAATGAAAAGC  
TCTATCTCTATTATCTCCAAAATGGAAGAGACATGTATGTGGACCAAGAATTAGA  
TATTAATCGTTTAAAGTATTATGATGTCGATGCCATTGTTCCACAAAGTTTCCTTA  
AAGACGATTCAATAGACAATAAGGTCTTAACGCGTTCTGATAAAAATCGTGGTAA  
ATCGGATAACGTTCCAAGTGAAGAAGTAGTCAAAAAGATGAAAACTATTGGAG  
ACAACCTTCTAAACGCCAAGTTAATCACTCAACGTAAGTTTGATAATTTAACGAAA  
GCTGAACGTGGAGGTTTGAGTGAACCTTGATAAAGCTGGTTTTTATCAAACGCCAA  
TTGGTTGAACTCGCCAAATCACTAAGCATGTGGCACAAATTTTGGATAGTCGCA  
TGAATACTAAATACGATGAAAATGATAAACTTATTCGAGAGGTTAAAGTGATTAC  
CTTAAAATCTAAATTAGTTTCTGACTTCCGAAAAGATTTCCAATTCTATAAAGTAC  
GTGAGATTAACAATTACCATCATGCCATGATGCGTATCTAAATGCCGTCGTTGG  
AACTGCTTTGATTAAGAAATATCCAAAACCTGAATCGGAGTTTGTCTATGGTGAT  
TATAAAGTTTATGATGTTTCGTAAAATGATTGCTAAGTCTGAGCAAGAAATAGGCA

AAGCAACCGCAAATATTTCTTTTACTCTAATATCATGAACTTCTTCAAAACAGAA  
ATTACACTTGCAAATGGAGAGATTGCGAAACGCCCTCTAATCGAACTAATGGG  
GAACTGGAGAAATTGTCTGGGATAAAGGGGCGAGATTTTGCCACAGTGCGCAA  
GTATTGTCCATGCCCAAGTCAATATTGTCAAGAAAACAGAAGTACAGACAGGC  
GGATTCTCCAAGGAGTCAATTTTACCAAAAAGAAATTCGGACAAGCTTATTGCTC  
GTAAAAAAGACTGGGATCCAAAAAATATGGTGGTTTTGATAGTCCAACGGTAG  
CTTATTCAGTCCTAGTGGTTGCTAAGGTGGAAAAAGGGAAATCGAAGAAGTTAA  
AATCCGTTAAAGAGTTACTAGGGATCACAATTATGGAAAGAAGTTCCTTTGAAAA  
AAATCCGATTGACTTTTTAGAAAGCTAAAGGATATAAGGAAGTTAAAAAAGACTTA  
ATCATTAAACTACCTAAATATAGTCTTTTTGAGTTAGAAAACGGTTCGTAAACGGA  
TGCTGGCTAGTGCCGGAGAATTACAAAAGGAAATGAGCTGGCTCTGCCAAGC  
AAATATGTGAATTTTTTATATTTAGCTAGTCATTATGAAAAGTTGAAGGGTAGTCC  
AGAAGATAACGAACAAAACAATTGTTTGTGGAGCAGCATAAGCATTATTTAGAT  
GAGATTATTGAGCAAATCAGTGAATTTTCTAAGCGTGTTATTTTAGCAGATGCCA  
ATTTAGATAAAGTTCTTAGTGCATATAACAAACATAGAGACAAACCAATACGTGA  
ACAAGCAGAAAATATTATTCATTTATTTACGTTGACGAATCTTGGAGCTCCCGCT  
GCTTTTAAATATTTTGATACAACAATTGATCGTAAACGATATACGTCTACAAAAGA  
AGTTTTAGATGCCACTCTTATCCATCAATCCATCACTGGTCTTTATGAAACACGC  
ATTGATTTGAGTCAGCTAGGAGGTCCTAGGGGAGGTGGCTCAGAAGGTGGCGG  
ATCTGAAGGTGGCTCTGGAactagtATGAGCGATAAAATTATTCACCTGACTGACG  
ACAGTTTTGACACGGATGTAICTCAAAGCGGACGGGGCGATCCTCGTTCGATTTCT  
GGGCAGAGTGGTGCGGTCCGTGCAAATGATCGCCCCGATTCTGGATGAAATC  
GCTGACGAATATCAGGGCAAACCTGACCGTTGCAAACCTGAACATCGATCAAAC  
CCTGGCACTGCGCCGAAATATGGCATCCGTGGTATCCCGACTCTGCTGCTGTTC  
AAAAACGGTGAAGTGGCGGCAACCAAAGTGGGTGCACTGTCTAAAGGTCAGTT  
GAAAGAGTTCCTCGACGCTAACCTGGCCGGTTCTGGTTCTGGCCATATGCACCA  
TCATCATCATCATTCTTCTGGTCTGGTGCCACGCGGTTCTGGTATGAAAGAAAC  
CGCTGCTGCTAAATTGAAACGCCAGCACATGGACAGCCCAGATCTGGGTACCG  
ACGACGACGACAAGGCCATGGCTGATATCggatccCATATGGAATGATGCTCGAT  
AAGAAACAGATTCGTGCGATCTTTCTTTGAGTTTAAAATGGGTTCGCAAAGCG  
GCGGAGACGACGCGTAATATTAACAACGCGTTCGGTCTGACCGCGAACGA  
GCGTACCGTGCAATGGTGGTTCAAAAAGTTTCGCAAAGGCGACGAATCTCTGGA  
GGACGAAGAGCGTTCTGGCCGCCCGTCCGAGGTTGACAACGACCAGCTGCGTG  
CAATCATCGAAGCTGATCCGCTGACTACCACCCGCGAAGTTGCTGAAGAAGTGA  
ATGTGGATCACTCTACTGTGGTTCGCCACCTGAAACAGATCGGTAAAGTAAAA  
AACTGGACAAATGGGTTCTCATGAACTGTCTGAAAACCGAAAAACCGTCGTT  
TCGAAGTTAGCTCCTCTCTGATTCTGCGTAACAACAACGAACCGTTCCTGGATC  
GTATCGTAACCTGTGATGAGAAATGGATTCTGTATGATAACCGTCGCCGCTCTG  
CTCAGTGGCTGGATCGCGAAGAAGCTCCAAAACACTTCCCGAAACCGAATCTGC  
ACCAGAAGAAAGTCATGGTAACCGTATGGTGGTCTGCCGCAGGTGTTATCCACT  
ATTCCTTCTGAACCCGGGCGAAACTATCACCAGCGAAAAATACTGCCAGCAGA  
TTGACGAATGCACCGTAAACTGCAGCGTCTGCAGCCAGCACTGGTGAATCGTA  
AAGGTCCGATCCTGCTGCATGATAACGCCCGTCCGCACGTTGCCCAACCGACC  
CTGCAGAACTGAACGAACTGGGCTATGAAGTTCTGCCACACCCGCCGTAICTCC

CCGGATCTGTCCCCGACTGACTACCATTTCTTCAAGCATCTGGACAACCTCCTG  
CAGGGTAAACGTTTTCAACAACCAACAGGACGCAGAAAACGCTTTCCAGGAGTTC  
GTCAAAGCCGTTCCACTGACTTCTACGCGACCCGGTATCAACAAGCTGATCAGC  
CGTTGGCAGAAATGCGTGGACTGTAACGGCAGCTACTTCGATTAAGACGTCTTA  
ATAACTAAAAATATGGTATAATACTCTTAATAAATGCAGTAATACAGGGGCTTTTC  
AAGACTGAAGTCTAGCTGAGACAAATAGTGCATTACGAAATTTTTAGACAAAA  
ATAGTCTACGAGGTTTTAGAGCTATGCTGTTTTGAATGGTCCCAAACCTGAGACC  
AGTCTCGGAAGCTCAAAGGTCTCGTTTTAGAGCTATGCTGTTTTGAATGGTCCC  
AAAACCTCAGCACACTGAGACTTGTGAGTTCCATGTTTTAGAGCTATGCTGTTT  
TGAATGGACTCCATTCAACATTGCCGATGATAACTTGAGAAAGAGGGTTAATACC  
AGCAGTCGGATACCTTCCTATTCTTTCTGTTAAAGCGTTTTTCATGTTATAATAGG  
CAAAGAAGAGTAGTGTGATCGTCCATTCCGACAGCATCGCCAGTCACTATGGC  
GTGCTGCTAGCGCTATATGCGTTGATGCAATTTCTATGCGCACCCGTTCTCGGA  
GCACTGTCCGACCGCTTTGGCCGCGCCAGTCCCTGCTCGCTTCGCTACTTGG  
AGCCACTATCGACTACGCGATCATGGCGACCACACCCGTCCTGTGGATCCTCTA  
CGCCGGACGCATCGTGGCCGGCATCACCGGCGCCACAGGTGCGGTTGCTGGC  
GCCTATATCGCCGACATCACCGATGGGGAAGATCGGGCTCGCCACTTCGGGCT  
CATGAGCGCTTGTTCGCGGTGGGTATGGTGGCAGGCCCGTGGCCGGGGGA  
CTGTTGGGCGCCATCTCCTTGCATGCACCATTCTTGCGGCGGCGGTGCTCAA  
CGGCCTCAACCTACTACTGGGCTGCTTCCCTAATGCAGGAGTCGCATAAGGGAG  
AGCGTCGACCGATGCCCTTGAGAGCCTTCAACCCAGTCAGCTCCTTCCGGTGG  
GCGCGGGGCATGACTATCGTCCGCGACTTATGACTGTCTTCTTTATCATGCAA  
CTCGTAGGACAGGTGCCGGCAGCGCTCTGGGTCATTTTCGGCGAGGACCGCTT  
TCGCTGGAGCGCGACGATGATCGGCCTGTCGCTTGCGGTATTCGGAATCTTGC  
ACGCCCTCGCTCAAGCCTTCGTCACTGGTCCCGCCACCAAACGTTTCGGCGAG  
AAGCAGGCCATTATCGCCGGCATGGCGGCCGACGCGCTGGGCTACGTCTTGCT  
GGCGTTCGCGACGCGAGGCTGGATGGCCTTCCCATTATGATTCTTCTCGCTTC  
CGGCGGCATCGGGATGCCCGCGTTGCAGGCCATGCTGTCCAGGCAGGTAGAT  
GACGACCATCAGGGACAGCTTCAAGGATCGCTCGCGGCTCTTACCAGCCTAAC  
TTCGATCATTGGACCGCTGATCGTCACGGCGATTTATGCCGCCTCGGCGAGCA  
CATGGAACGGGTTGGCATGGATTGTAGGCGCCGCCCTATACCTTGTCTGCCTC  
CCGCGTTCGCTCGCGGTGCATGGAGCCGGGCCACCTCGACCTGAATGGAAG  
CCGGCGGCACCTCGCTAACGGATTCACCACTCCAAGAATTGGAGCCAATCAATT  
CTTGCGGAGAACTGTGAATGCGCAAACCAACCTTGGCAGAACATATCCATCGC  
GTCCGCCATCTCCAGCAGCCGCACGCGGCGCATCTCGGGCAGCGTTGGGTCTT  
GGCCACGGGTGCGCATGATCGTGCTCCTGTGCTTGAAGACCCGGCTAGGCTGG  
CGGGGTTGCCCTTACTGGTTAGCAGAATGAATCACCGATACGCGAGCGAACGTG  
AAGCGACTGCTGCTGAAAACGTCTGCGACCTGAGCAACAACATGAATGGTCTT  
CGGTTTTCCGTGTTTCGTAAAGTCTGGAAACGCGGAAGTCCCCTACGTGCTGCTG  
AAGTTGCCCGCAACAGAGAGTGAACCAACCGGTGATACCACGATACTATGACT  
GAGAGTCAACGCCATGAGCGGCCTCATTTCTTATTCTGAGTTACAACAGTCCGC  
ACCGCTGTCCGGTAGCTCCTTCCGGTGGGCGCGGGGCATGACTATCGTCCCGC  
CACTTATGACTGTCTTCTTTATCATGCAACTCGTAGGACAGGTGCCGGCAGCGC  
CAAACAGTCCCCCGGCCACGGGGCCTGCCACCATACCCACGCCGAAACAAGC

GCCCTGCACCATTATGTTCCGGATCTGCATCGCAGGATGCTGCTGGCTACCCTG  
TGGAACACCTACATCTGTATTAACGAAGCGCTAACCGTTTTTATCAGGCTCTGG  
GAGGCAGAATAAATGATCATATCGTCAATTATTACCTCCACGGGGAGAGCCTGA  
GCAAACCTGGCCTCAGGCATTTGAGAAGCACACGGTCACACTGCTTCCGGTAGTC  
AATAAACCGGTAAACCAGCAATAGACATAAGCGGCTATTTAACGACCCTGCCCT  
GAACCGACGACCGGGTCTGAATTTGCTTTCTGAATTTCTGCCATTCATCCGCTTATT  
ATCACTTATTCAGGCGTAGCACCAGGCGTTTAAGGGCACCAATAACTGCCTTAA  
AAAAATTACGCCCCGCCCTGCCACTCATCGCAGTACTGTTGTAATTCATTAAGCA  
TTCTGCCGACATGGAAGCCATCACAGACGGCATGATGAACCTGAATCGCCAGC  
GGCATCAGCACCTTGTCGCCTTGCGTATAATATTTGCCCATGGTGAAAACGGGG  
GCGAAGAAGTTGTCCATATTGGCCACGTTTAAATCAAACCTGGTGAAACTCACC  
CAGGGATTGGCTGAGACGAAAAACATATTCTCAATAAACCCCTTTAGGGAAATAG  
GCCAGGTTTTTCACCGTAACACGCCACATCTTGCGAATATATGTGTAGAAACTGC  
CGGAAATCGTCGTGGTATTCACTCCAGAGCGATGAAAACGTTTCAGTTTGCTCA  
TGGAACCGGTGTAACAAGGGTGAACACTATCCCATATCACCAGCTCACCGTCT  
TTCATTGCCATACG

pRC2304

GAATTCGGATGAGCATTTCATCAGGCGGGCAAGAATGTGAATAAAGGCCGGAT  
AAAACCTTGCTTATTTTTCTTTACGGTCTTTAAAAGGCCGTAATATCCAGCTGA  
ACGGTCTGGTTATAGGTACATTGAGCAACTGACTGAAATGCCTCAAATGTTCTT  
TACGATGCCATTGGGATATATCAACGGTGGTATATCCAGTGATTTTTTTCTCCAT  
TTTAGCTTCCTTAGCTCCTGAAAATCTCGATAACTCAAAAATACGCCCGGTAGT  
GATCTTATTTTCATTATGGTGAAAGTTGGAACCTCTTACGTGCCGATCAACGTCTC  
ATTTTCGCCAAAAGTTGGCCCAGGGCTTCCCGGTATCAACAGGGACACCAGGAT  
TTATTTATTCTGCGAAGTGATCTTCCGTCACAGGTATTTATTCGGCGCAAAGTGC  
GTCCGGGTGATGCTGCCAACTTACTGATTTAGTGTATGATGGTGTTTTTGAGGTG  
CTCCAGTGGCTTCTGTTTCTATCAGCTGTCCCTCCTGTTTCAGCTACTGACGGGG  
TGGTGCGTAACGGCAAAGCACCGCCGGACATCAGCGCTAGCGGAGTGTATAC  
TGGCTTACTATGTTGGCACTGATGAGGGTGTGAGTGAAGTGCTTCATGTGGCAG  
GAGAAAAAAGGCTGCACCGGTGCGTCAGCAGAATATGTGATACAGGATATATTC  
CGCTTCCTCGCTCACTGACTCGCTACGCTCGGTGCTTCGACTGCGGCGAGCGG  
AAATGGCTTACGAACGGGGCGGAGATTTCTGGAAGATGCCAGGAAGATACTTA  
ACAGGGAAGTGAGAGGGGCCGCGGCAAAGCCGTTTTTCCATAGGCTCCGCCCCC  
CTGACAAGCATCACGAAATCTGACGCTCAAATCAGTGGTGGCGAAACCCGACA  
GGACTATAAAGATACCAGGCGTTTTCCCCTGGCGGCTCCCTCGTGCGCTCTCCT  
GTTCTGCTTTCCGTTTACCGGTGTCATTCCGCTGTTATGGCCGCGTTTGTCT  
CATTCCACGCCTGACACTCAGTTCCGGGTAGGCAGTTCGCTCCAAGCTGGACT  
GTATGCACGAACCCCCCGTTTCAGTCCGACCGCTGCGCCTTATCCGGTAACTATC  
GTCTTGAGTCCAACCCGAAAGACATGCAAAGCACCACTGGCAGCAGCCACT  
GGTAATTGATTTAGAGGAGTTAGTCTTGAAGTCATGCGCCGGTTAAGGCTAAC  
TGAAAGGACAAGTTTTGGTGACTGCGCTCCTCCAAGCCAGTTACCTCGGTTCAA  
AGAGTTGGTAGCTCAGAGAACCTTCGAAAACCGCCCTGCAAGGCGGTTTTTTC

GTTTT CAGAGCAAGAGATTACGCGCAGACCAAACGATCTCAAGAAGATCATCT  
TATTAATCAGATAAAAATATTTCTAGATTT CAGTGCAATTTATCTCTTCAAATGTAG  
CACCTGAAGTCAGCCCCATACGATATAAGTTGTAATTCTCATGTTTGACAGCTTA  
TCATCGATAAGCTTTAATGCGGTAGTTTATCACAGTTAAATTGCTAACGCAGTCA  
GGCACCGTGTATGAAATCTAACAAATGCGCTCATCGTCATCCTCGGCACCGTCAC  
CCTGGATGCTGTAGGCATAGGCTTGGTTATGCCGGTACTGCCGGGCCTCTTGC  
GGGATTACGAAATCATCCTGTGGAGCTTAGTAGGTTTAGCAAGATGGCAGCGCC  
TAAATGTAGAATGATAAAAGGATTAAGAGATTAATTTCCCTAAAAATGATAAAACA  
AGCGTTTTGAAAGCGCTTGTTTTTTTGGTTTGCAGTCAGAGTAGAATAGAAGTAT  
CAAAAAAGCACCGACTCGGTGCCACTTTTTCAAGTTGATAACGGACTAGCCTT  
ATTTAACTTGCTATGCTGTTTTGAATGGTTCCAACAAGATTATTTTATAACTTTTA  
TAACAAATAATCAAGGAGAAATTCAAAGAAATTTATCAGCCATAAAACAATACTTA  
ATACTATAGAATGATAACAAAATAAACTACTTTTTAAAAGAATTTTGTGTTATAATC  
TATTTATTATTAAGTATTGGGTAATATTTTTTTGAAGAGATATTTTGAAAAAGAAAA  
TTAAAGCATATTAACACTAATTTCCGGAGGTCATTAAACTATTATTGAAATCATCAA  
ACTCATGCATCATATGGAAATGATGCTCGATAAGAAACAGATTCGTGCGATCTTT  
CTCTTTGAGTTTAAAATGGGTTCGCAAAGCGGCGGAGACGACGCGTAATATTAAC  
AACGCGTTCGGTCCCTGGCACCGCGAACGAGCGTACCGTGCAATGGTGGTTCAA  
AAAGTTTCGCAAAGGCGACGAATCTCTGGAGGACGAAGAGCGTTCTGGCCGCC  
CGTCCGAGGTTGACAACGACCAGCTGCGTGCAATCATCGAAGCTGATCCGCTG  
ACTACCACCCGCGAAGTTGCTGAAGA ACTGAATGTGGATCACTCTACTGTGGTT  
CGCCACCTGAAACAGATCGGTAAAGTAAAAAACTGGACAAATGGGTTCCCTCAT  
GAACTGTCTGAAAACAGAAAAACCGTCGTTTCGAAGTTAGCTCCTCTCTGATTC  
TGCGTAACAACAACGAACCGTTCCCTGGATCGTATCGTAACCTGTGATGAGAAAT  
GGATTCTGTATGATAACCGTCGCCGCTCTGCTCAGTGGCTGGATCGCGAAGAA  
GCTCCAAAACACTTCCCGAAACCGAATCTGCACCAGAAGAAAGTCATGGTAACC  
GTATGGTGGTCTGCCGCAGGTGTTATCCACTATTCCTTCCCTGAACCCGGGCGAA  
ACTATCACCAGCGAAAAATACTGCCAGCAGATTGACGAAATGCACCGTAAACTG  
CAGCGTCTGCAGCCAGCACTGGTGAATCGTAAAGGTCCGATCCTGCTGCATGAT  
AACGCCCGTCCGCACGTTGCCCAACCGACCCTGCAGAACTGAACGA ACTGGG  
CTATGAAGTTCTGCCACACCCGCGTACTCCCCGGATCTGTCCCCGACTGACTA  
CCATTTCTTCAAGCATCTGGACA ACTTCCCTGCAGGGTAAACGTTTTTACAACCAA  
CAGGACGCAGAAAACGCTTTCCAGGAGTTCGTGCAAAGCCGTTCCACTGACTTC  
TACGCGACCGGTATCAACAAGCTGATCAGCCGTTGGCAGAAATGCGTG GACTG  
TAACGGCAGCTACTTCGATtctagaGGAGGTGGCTCAGAAGGTGGCGGATCTGAA  
GGTGGCTCTGGAactagtATGAGCGATAAAATTATTCACCTGACTGACGACAGTTT  
TGACACGGATGTA CTCAAAGCGGACGGGGCGATCCTCGTCGATTTCTGGGCAG  
AGTGGTGCGGTCCGTGCAAATGATCGCCCCGATTCTGGATGAAATCGCTGAC  
GAATATCAGGGCAA ACTGACCGTTGCAA ACTGAACATCGATCAAACCCCTGGC  
ACTGCGCCGAAATATGGCATCCGTGGTATCCCGACTCTGCTGCTGTTCAAAAAC  
GGTGAAGTGGCGGCAACCAAAGTGGGTGCACTGTCTAAAGGTCAGTTGAAAGA  
GTTCCCTCGACGCTAACCTGGCCGTTCTGGTTCTGGCCATATGCACCATCATCA  
TCATCATTCTTCTGGTCTGGTGCCACGCGGTTCTGGTATGAAAGAAACCGCTGC  
TGCTAAATTCGAACGCCAGCACATGGACAGCCAGATCTGGGTACCGACGACG

ACGACAAGGCCATGGCTGATATCCTCGAGATGGATAAGAAATACTCAATAGGCT  
TAGCTATCGGCACAAATAGCGTCCGATGGGCGGTGATCACTGATGAATATAAGG  
TTCCGTCTAAAAAGTTCAAGGTTCTGGGAAATACAGACCGCCACAGTATCAAAA  
AAAATCTTATAGGGGCTCTTTTATTTGACAGTGGAGAGACAGCGGAAGCGACTC  
GTCTCAAACGGACAGCTCGTAGAAGGTATACACGTCGGAAGAATCGTATTTGTT  
ATCTACAGGAGATTTTTTCAAATGAGATGGCGAAAGTAGATGATAGTTTCTTTCA  
TCGACTTGAAGAGTCTTTTTTGGTGGAGAAGACAAGAAGCATGAACGTCATCC  
TATTTTTGGAAATATAGTAGATGAAGTTGCTTATCATGAGAAATATCCAATCT  
ATCATCTGCGAAAAAATTGGTAGATTCTACTGATAAAGCGGATTTGCGCTTAAT  
CTATTTGGCCTTAGCGCATATGATTAAGTTTCGTGGTCATTTTTTGATTGAGGGA  
GATTTAAATCCTGATAATAGTGATGTGGACAACTATTTATCCAGTTGGTACAAA  
CCTACAATCAATTATTTGAAGAAAACCCTATTAACGCAAGTGGAGTAGATGCTAA  
AGCGATTCTTTCTGCACGATTGAGTAAATCAAGACGATTAGAAAATCTCATTGCT  
CAGCTCCCCGGTGAGAAGAAAAATGGCTTATTTGGGAATCTCATTGCTTTGTCAT  
TGGGTTTGACCCCTAATTTTAAATCAAATTTTGATTTGGCAGAAGATGCTAAATTA  
CAGCTTTCAAAGATACTTACGATGATGATTTAGATAATTTATTGGCGCAAATTG  
GAGATCAATATGCTGATTTGTTTTTGGCAGCTAAGAATTTATCAGATGCTATTTTA  
CTTTCAGATATCCTAAGAGTAAATACTGAAATAACTAAGGCTCCCCTATCAGCTT  
CAATGATTAACGCTACGATGAACATCATCAAGACTTGACTCTTTTAAAAGCTTT  
AGTTCGACAACAACCTCCAGAAAAGTATAAAGAAATCTTTTTTGATCAATCAAAAA  
ACGGATATGCAGGTTATATTGATGGGGGAGCTAGCCAAGAAGAATTTTATAAATT  
TATCAAACCAATTTTAGAAAAAATGGATGGTACTGAGGAATTATTGGTGAAACTA  
AATCGTGAAGATTTGCTGCGCAAGCAACGGACCTTTGACAACGGCTCTATTCCC  
CATCAAATTCACCTGGGTGAGCTGCATGCTATTTTGAGAAGACAAGAAGACTTTT  
ATCCATTTTTAAAAGACAATCGTGAGAAGATTGAAAAAATCTTGACTTTTGAATT  
CCTTATTATGTTGGTCCATTGGCGCGTGGCAATAGTCGTTTTGCATGGATGACT  
CGGAAGTCTGAAGAAACAATTACCCCATGGAATTTTGAAGAAGTTGTGCATAAA  
GGTGCTTCAGCTCAATCATTTATTGAACGCATGACAACTTTGATAAAAATCTTC  
CAAATGAAAAAGTACTACCAAACATAGTTTGCTTTATGAGTATTTTACGGTTTAT  
AACGAATTGACAAAGGTCAAATATGTTACTGAAGGAATGCGAAAACCAGCATTTC  
TTTCAGGTGAACAGAAGAAAGCCATTGTTGATTTACTCTTCAAACAAATCGAAA  
AGTAACCGTTAAGCAATTAAGAAGATTATTTCAAAAAAATAGAATGTTTTGATA  
GTGTTGAAATTTAGGAGTTGAAGATAGATTTAATGCTTCATTAGGTACCTACCA  
TGATTTGCTAAAATTTAAGATAAAGATTTTTTGGATAATGAAGAAAATGAAG  
ATATCTTAGAGGATATTGTTTTAACATTGACCTTATTTGAAGATAGGGAGATGATT  
GAGGAAAGACTTAAAACATATGCTCACCTCTTTGATGATAAGGTGATGAAACAG  
CTTAAACGTCGCCGTTATACTGGTTGGGGACGTTTGTCTCGAAAATTGATTAATG  
GTATTAGGGATAAGCAATCTGGCAAACAATATTAGATTTTTTGAATCAGATGG  
TTTTGCCAATCGCAATTTTATGCAGCTGATCCATGATGATAGTTTGACATTTAAA  
GAAGACATTCAAAAAGCACAAGTGTCTGGACAAGGCGATAGTTTACATGAACAT  
ATTGCAATTTAGCTGGTAGCCCTGCTATTA AAAAAGGTATTTTACAGACTGTAA  
AAGTTGTTGATGAATTGGTCAAAGTAATGGGGCGGCATAAGCCAGAAAATATCG  
TTATTGAAATGGCACGTGAAAATCAGACAACTCAAAGGGCCAGAAAATTCGC  
GAGAGCGTATGAAACGAATCGAAGAAGGTATCAAAGAATTAGGAAGTCAGATTC

TTAAAGAGCATCCTGTTGAAAATACTCAATTGCAAATGAAAAGCTCTATCTCTAT  
TATCTCCAAAATGGAAGAGACATGTATGTGGACCAAGAATTAGATATTAATCGTT  
TAAGTGATTATGATGTCGATGCCATTGTTCCACAAAGTTTCCTTAAAGACGATTC  
AATAGACAATAAGGTCTTAACGCGTTCTGATAAAAATCGTGGTAAATCGGATAAC  
GTTCCAAGTGAAGAAGTAGTCAAAAAGATGAAAACTATTGGAGACAACCTTCTAA  
ACGCCAAGTTAATCACTCAACGTAAGTTTGATAATTTAACGAAAGCTGAACGTGG  
AGGTTTGAGTGAACCTTGATAAAGCTGGTTTTATCAAACGCCAATTGGTTGAACT  
CGCCAAATCACTAAGCATGTGGCACAAATTTGGATAGTCGCATGAATACTAAAT  
ACGATGAAAATGATAAACTTATTCGAGAGGTTAAAGTGATTACCTTAAAATCTAA  
ATTAGTTTCTGACTTCCGAAAAGATTTCCAATTCTATAAAGTACGTGAGATTAACA  
ATTACCATCATGCCCATGATGCGTATCTAAATGCCGTCGTTGGAACCTGCTTTGAT  
TAAGAAATATCCAAAACCTTGAATCGGAGTTTGTCTATGGTGATTATAAAGTTTATG  
ATGTTTCGTA AAAATGATTGCTAAGTCTGAGCAAGAAATAGGCAAAGCAACCGCAA  
AATATTTCTTTACTCTAATATCATGAACTTCTTCAAACAGAAATTACACTTGCA  
AATGGAGAGATTGCGAAACGCCCTCTAATCGAACTAATGGGGAACTGGAGAA  
ATTGTCTGGGATAAAGGGCGAGATTTGCCACAGTGC GCAAAGTATTGTCCATG  
CCCAAGTCAATATTGTCAAGAAAACAGAAGTACAGACAGGCGGATTCTCCAAG  
GAGTCAATTTTACCAAAAAGAAATTCGGACAAGCTTATTGCTCGTAAAAAAGACT  
GGGATCCAAAAAATATGGTGGTTTTGATAGTCCAACGGTAGCTTATTCAGTCCT  
AGTGGTTGCTAAGGTGGAAAAGGGAAATCGAAGAAGTTAAAATCCGTTAAAGA  
GTTACTAGGGATCACAATTATGGAAAGAAGTTCCTTTGAAAAAATCCGATTGAC  
TTTTTAGAAGCTAAAGGATATAAGGAAGTTAAAAAAGACTTAATCATTAACTACC  
TAAATATAGTCTTTTTGAGTTAGAAAACGGTCGTAAACGGATGCTGGCTAGTGCC  
GGAGAATTACAAAAGGAAATGAGCTGGCTCTGCCAAGCAAATATGTGAATTTTT  
TATATTTAGCTAGTCATTATGAAAAGTTGAAGGGTAGTCCAGAAGATAACGAACA  
AAAACAATTGTTTGTGGAGCAGCATAAGCATTATTTAGATGAGATTATTGAGCAA  
ATCAGTGAATTTTCTAAGCGTGTTATTTTAGCAGATGCCAATTTAGATAAAGTTCT  
TAGTGCATATAACAAACATAGAGACAAACCAATACGTGAACAAGCAGAAAATATT  
ATTCATTTATTTACGTTGACGAATCTTGGAGCTCCCGCTGCTTTTAAATATTTTGA  
TACAACAATTGATCGTAAACGATATACGTCTACAAAAGAAGTTTTAGATGCCACT  
CTTATCCATCAATCCATCACTGGTCTTTATGAAACACGCATTGATTTGAGTCAGC  
TAGGAGGTGACTGAAGTATATTTTAGATGAAGATTATTTCTTAATAACTAAAAATA  
TGGTATAACTCTTAATAAATGCAGTAATACAGGGGCTTTTCAAGACTGAAGTC  
TAGCTGAGACAAATAGTGCGATTACGAAATTTTTAGACAAAATAGTCTACGAG  
GTTTTAGAGCTATGCTGTTTTGAATGGTCCCAAACGGTTTTCCAGTCACGACG  
TTGTAAAACGAGTTTTAGAGCTATGCTGTTTTGAATGGTCCCAAACCTTCAGCAC  
ACTGAGACTTGTTGAGTTCCATGTTTTAGAGCTATGCTGTTTTGAATGGACTCCA  
TTCAACATTGCCGATGATAACTTGAGAAAGAGGGTTAATACCAGCAGTCGGATA  
CCTTCTATTCTTTCTGTTAAAGCGTTTTTCATGTTATAATAGGCAAAGAAGAGTA  
GTGTGATCGTCCATTCCGACAGCATCGCCAGTCACTATGGCGTGCTGCTAGCG  
CTATATGCGTTGATGCAATTTCTATGCGCACCCGTTCTCGGAGCACTGTCCGAC  
CGCTTTGGCCGCCGCCAGTCCTGCTCGCTTCGCTACTTGGAGCCACTATCGA  
CTACGCGATCATGGCGACCACACCCGTCCTGTGGATCCTCTACGCCGGACGCA  
TCGTGGCCGGCATCACCGGCCACAGGTGCGGTTGCTGGCGCCTATATCGCC

GACATCACCGATGGGGAAGATCGGGCTCGCCACTTCGGGCTCATGAGCGCTTG  
TTTCGGCGTGGGTATGGTGGCAGGCCCGTGGCCGGGGGACTGTTGGGCGCC  
ATCTCCTTGCATGCACCATTCCCTTGCGGCGGCGGTGCTCAACGGCCTCAACCTA  
CTACTGGGCTGCTTCTAATGCAGGAGTCGCATAAGGGAGAGCGTCGACCGAT  
GCCCTTGAGAGCCTTCAACCCAGTCAGCTCCTTCCGGTGGGCGCGGGGCATGA  
CTATCGTCGCCGCACTTATGACTGTCTTCTTTATCATGCAACTCGTAGGACAGGT  
GCCGGCAGCGCTCTGGGTCATTTTTCGGCGAGGACCGCTTTCGCTGGAGCGCGA  
CGATGATCGGCCTGTGCTTGCGGTATTCGGAATCTTGCACGCCCTCGCTCAAG  
CCTTCGTCACTGGTCCC GCCACCAAACGTTTCGGCGAGAAGCAGGCCATTATC  
GCCGGCATGGCGGCCGACGCGCTGGGCTACGTCTTGCTGGCGTTTCGCGACGC  
GAGGCTGGATGGCCTTCCCATTATGATTCTTCTCGCTTCCGGCGGCATCGGGA  
TGCCCGCGTTGCAGGCCATGCTGTCCAGGCAGGTAGATGACGACCATCAGGGA  
CAGCTTCAAGGATCGCTCGCGGCTCTTACCAGCCTAACTTCGATCATTGGACCG  
CTGATCGTCACGGCGATTTATGCCGCCTCGGCGAGCACATGGAACGGGTTGGC  
ATGGATTGTAGGCGCCGCCCTATACCTTGTCTGCCTCCCCGCGTTGCGTCGCG  
GTGCATGGAGCCGGGCCACCTCGACCTGAATGGAAGCCGGCGGCACCTCGCT  
AACGGATTCACTCCAAGAATTGGAGCCAATCAATTCTTGCGGAGA ACTGTG  
AATGCGCAAACCAACCCTTGGCAGAACATATCCATCGCGTCCGCCATCTCCAGC  
AGCCGCACGCGGCATCTCGGGCAGCGTTGGGTCTGGCCACGGGTGCGCA  
TGATCGTGCTCCTGTGCTT GAGGACCCGGCTAGGCTGGCGGGGTTGCCTTACT  
GGTTAGCAGAATGAATCACCGATACGCGAGCGAACGTGAAGCGACTGCTGCTG  
CAAACGTCTGCGACCTGAGCAACAACATGAATGGTCTTCGGTTTCCGTGTTTC  
GTAAAGTCTGGAAACGCGGAAGTCCCCTACGTGCTGCTGAAGTTGCCCGCAAC  
AGAGAGTGGAAACCAACCGGTGATAACCACGATACTATGACTGAGAGTCAACGCC  
ATGAGCGGCCTCATTCTTATTCTGAGTTACAACAGTCCGCACCGCTGTCCGGT  
AGCTCCTTCCGGTGGGCGCGGGGCATGACTATCGTCGCCGCACTTATGACTGT  
CTTCTTTATCATGCAACTCGTAGGACAGGTGCCGGCAGCGCCCAACAGTCCCC  
GGCCACGGGGCCTGCCACCATAACCACGCCGAAACAAGCGCCCTGCACCATTA  
TGTTCCGGATCTGCATCGCAGGATGCTGCTGGCTACCCTGTGGAACACCTACAT  
CTGTATTAACGAAGCGCTAACCGTTTTTATCAGGCTCTGGGAGGCAGAATAAAT  
GATCATATCGTCAATTATTACCTCCACGGGGAGAGCCTGAGCAA ACTGGCCTCA  
GGCATTGAGAAGCACACGGTCACACTGCTTCCGGTAGTCAATAAACCGGTAAA  
CCAGCAATAGACATAAGCGGCTATTTAACGACCCTGCCCTGAACCGACGACCG  
GGTCGAATTTGCTTTTGAATTTCTGCCATT CATCCGCTTATTATCACTTATTCAGG  
CGTAGCACCAGGCGTTTAAAGGGCACCAATAACTGCCTTAAAAAATTACGCCCC  
GCCCTGCCACTCATCGCAGTACTGTTGTAATTCATTAAGCATTCTGCCGACATG  
GAAGCCATCACAGACGGCATGATGAACCTGAATCGCCAGCGGCATCAGCACCT  
TGTCGCCTTGCGTATAATATTTGCCCATGGTGAAAACGGGGGCGAAGAAGTTGT  
CCATATTGGCCACGTTTAAATCAA ACTGGTGAACTCACCCAGGGATTGGCTG  
AGACGAAAAACATATTCTCAATAAACCTTTAGGGAAATAGGCCAGGTTTTCCACC  
GTAACACGCCACATCTTGCGAATATATGTGTAGAACTGCCGGAATCGTCGTG  
GTATTCACTCCAGAGCGATGAAAACGTTTCAGTTTGCTCATGAAAACGGGTGTA  
ACAAGGGTGAACACTATCCCATATCACCAGCTCACCGTCTTTCATTGCCATACG



pRC2305

GAATTCCGGATGAGCATTTCATCAGGCGGGCAAGAATGTGAATAAAGGCCGGAT  
AAAAC TTGTGCTTATTTTTCTTTACGGTCTTTAAAAAGGCCGTAATATCCAGCTGA  
ACGGTCTGGTTATAGGTACATTGAGCAACTGACTGAAATGCCTCAAAATGTTCTT  
TACGATGCCATTGGGATATATCAACGGTGGTATATCCAGTGATTTTTTTCTCCAT  
TTAGCTTCCTTAGCTCCTGAAAATCTCGATAACTCAAAAAATACGCCCGGTAGT  
GATCTTATTTTATTATGGTGAAAGTTGGAACCTCTTACGTGCCGATCAACGTCTC  
ATTTTCGCCAAAAGTTGGCCCAGGGCTTCCCGGTATCAACAGGGACACCAGGAT  
TTATTTATTCTGCGAAGTGATCTTCCGTACAGGTATTTATTTCGGCGCAAAGTGC  
GTCGGGTGATGCTGCCAACTTACTGATTTAGTGTATGATGGTGTTTTTGAGGTG  
CTCCAGTGGCTTCTGTTTCTATCAGCTGTCCCTCCTGTTTCAGCTACTGACGGGG  
TGGTGC GTAACGGCAAAGCACCGCCGGACATCAGCGCTAGCGGAGTGTATAC  
TGGCTTACTATGTTGGCACTGATGAGGGTGT CAGTGAAGTGCTTCATGTGGCAG  
GAGAAAAAGGCTGCACCGGTGCGTCAGCAGAATATGTGATACAGGATATATTC  
CGCTTCTCGCTCACTGACTCGCTACGCTCGGTCTGTTTCGACTGCGGCGAGCGG  
AAATGGCTTACGAACGGGGCGGAGATTTCTGGAAGATGCCAGGAAGATACTTA  
ACAGGGAAGTGAGAGGGCCGCGCAAAGCCGTTTTTCCATAGGCTCCGCCCCC  
CTGACAAGCATCACGAAATCTGACGCTCAAATCAGTGGTGGCGAAACCCGACA  
GGACTATAAAGATACCAGGCGTTTTCCCCTGGCGGCTCCCTCGTGCCTCTCCT  
GTTCTGCTTTTCGGTTTACCGGTGTCATTCCGCTGTTATGGCCGCGTTTGTCT  
CATTCCACGCCTGACACTCAGTTCGGGGTAGGCAGTTCGCTCCAAGCTGGACT  
GTATGCACGAACCCCCCGTTCAGTCCGACCGCTGCGCCTTATCCGGTAACTATC  
GTCTTGAGTCCAACCCGGAAAGACATGCAAAGCACCACTGGCAGCAGCCACT  
GGTAATTGATTTAGAGGAGTTAGTCTTGAAGTCATGCGCCGGTTAAGGCTAAAC  
TGAAAGGACAAGTTTTGGTGACTGCGCTCCTCCAAGCCAGTTACCTCGGTTCAA  
AGAGTTGGTAGCTCAGAGAACCTTCGAAAAACCGCCCTGCAAGGCGGTTTTTTC  
GTTTTCAGAGCAAGAGATTACGCGCAGACCAAACGATCTCAAGAAGATCATCT  
TATTAATCAGATAAAATATTTCTAGATTTT CAGTGCAATTTATCTCTTCAAATGTAG  
CACCTGAAGTCAGCCCCATACGATATAAGTTGTAATTCTCATGTTTGACAGCTTA  
TCATCGATAAGCTTTAATGCGGTAGTTTATCACAGTTAAATTGCTAACGCAGTCA  
GGCACCGTGTATGAAATCTAACAAATGCGCTCATCGTCATCCTCGGCACCGTCAC  
CCTGGATGCTGTAGGCATAGGCTTGGTTATGCCGGTACTGCCGGGCCTCTTGC  
GGGATTACGAAATCATCCTGTGGAGCTTAGTAGGTTTAGCAAGATGGCAGCGCC  
TAAATGTAGAATGATAAAAGGATTAAGAGATTAATTTCCCTAAAAATGATAAAACA  
AGCGTTTTGAAAGCGCTTGTTTTTTGGTTTGCAGTCAGAGTAGAATAGAAGTAT  
CAAAAAAAGCACCGACTCGGTGCCACTTTTTCAAGTTGATAACGGACTAGCCTT  
ATTTAACTTGCTATGCTGTTTTGAATGGTTCCAACAAGATTATTTTATAACTTTTA  
TAACAAATAATCAAGGAGAAATTC AAAGAAATTTATCAGCCATAAAACAATACTTA  
ATACTATAGAATGATAACAAAATAAACTACTTTTTAAAAGAATTTTGTGTTATAATC  
TATTTATTATTAAGTATTGGGTAATATTTTTTGAAGAGATATTTTAAAAAGAAAA  
TTAAAGCATATTAAC TAATTTTCGGAGGTCATTAAACTATTATTGAAATCATCAA  
ACTCATTATGGATTTAATTTAACTTTTTATTTTAGGAGGC AAAAATGGATAAGAA  
ATACTCAATAGGCTTAGCTATCGGCACAAATAGCGTCGGATGGGCGGTGATCAC  
TGATGAATATAAGGTTCCGTCTAAAAAGTTCAAGGTTCTGGGAAATACAGACCG

CCACAGTATCAAAAAAATCTTATAGGGGCTCTTTTATTTGACAGTGGAGAGACA  
GCGGAAGCGACTCGTCTCAAACGGACAGCTCGTAGAAGGTATACACGTCCGAA  
GAATCGTATTTGTTATCTACAGGAGATTTTTTCAAATGAGATGGCGAAAGTAGAT  
GATAGTTTCTTTTCATCGACTTGAAGAGTCTTTTTTGGTGGGAAGAAGACAAGAAGC  
ATGAACGTCATCCTATTTTTGGAAATATAGTAGATGAAGTTGCTTATCATGAGAA  
ATATCCAACCTATCTATCATCTGCGAAAAAATTGGTAGATTCTACTGATAAAGCG  
GATTTGCGCTTAATCTATTTGGCCTTAGCGCATATGATTAAGTTTCGTGGTCATT  
TTTTGATTGAGGGAGATTTAAATCCTGATAATAGTGATGTGGACAACTATTTAT  
CCAGTTGGTACAAACCTACAATCAATTATTTGAAGAAAACCCTATTAACGCAAGT  
GGAGTAGATGCTAAAGCGATTCTTTCTGCACGATTGAGTAAATCAAGACGATTA  
GAAAATCTCATTGCTCAGCTCCCCGGTGAGAAGAAAAATGGCTTATTTGGGAAT  
CTCATTGCTTTGTCATTGGGTTTGACCCCTAATTTTAAATCAAATTTTGATTTGGC  
AGAAGATGCTAAATTACAGCTTTCAAAAGATACTTACGATGATGATTTAGATAATT  
TATTGGCGCAAATTGGAGATCAATATGCTGATTTGTTTTTGGCAGCTAAGAATTT  
ATCAGATGCTATTTTACTTTTCAAGATATCCTAAGAGTAAATACTGAAATAACTAAGG  
CTCCCCTATCAGCTTCAATGATTAACGCTACGATGAACATCATCAAGACTTGAC  
TCTTTTAAAAGCTTTAGTTTCGACAACAACCTCCAGAAAAGTATAAAGAAATCTTTT  
TTGATCAATCAAAAAACGGATATGCAGGTTATATTGATGGGGGAGCTAGCCAAG  
AAGAATTTTATAAATTTATCAAACCAATTTTAGAAAAAATGGATGGTACTGAGGAA  
TTATTGGTGAAACTAAATCGTGAAGATTTGCTGCGCAAGCAACGGACCTTTGAC  
AACGGCTCTATTCCCATCAAATTCACCTGGGTGAGCTGCATGCTATTTTGAGAA  
GACAAGAAGACTTTTTATCCATTTTTTAAAAGACAATCGTGAGAAGATTGAAAAAT  
CTTGACTTTTTCGAATTCCTTATTATGTTGGTCCATTGGCGCGTGGCAATAGTCGT  
TTTGCATGGATGACTCGGAAGTCTGAAGAAACAATTACCCCATGGAATTTTGAAG  
AAGTTGTCGATAAAGGTGCTTCAGCTCAATCATTTATTGAACGCATGACAACTT  
TGATAAAAATCTTCCAAATGAAAAAGTACTACCAAACATAGTTTGCTTTATGAGT  
ATTTTACGGTTTATAACGAATTGACAAAGGTCAAATATGTTACTGAAGGAATGCG  
AAAACCAGCATTTCCTTTCAGGTGAACAGAAGAAAGCCATTGTTGATTTACTCTTC  
AAAACAAATCGAAAAGTAACCGTTAAGCAATTAAGAAGATTATTTCAAAAAAAT  
AGAATGTTTTGATAGTGTTGAAATTTCAAGGAGTTGAAGATAGATTTAATGCTTCAT  
TAGGTACCTACCATGATTTGCTAAAATTTAATAAGATAAAGATTTTTTGGATAAT  
GAAGAAAATGAAGATATCTTAGAGGATATTGTTTTAACATTGACCTTATTTGAAGA  
TAGGGAGATGATTGAGGAAAGACTTAAAACATATGCTCACCTCTTTGATGATAAG  
GTGATGAAACAGCTTAAACGTCGCCGTTATACTGGTTGGGGACGTTTGTCTCGA  
AAATTGATTAATGGTATTAGGGATAAGCAATCTGGCAAACAATATTAGATTTTTT  
GAAATCAGATGGTTTTGCCAATCGCAATTTTATGCAGCTGATCCATGATGATAGT  
TTGACATTTAAGAAGACATTCAAAAGCACAAAGTGTCTGGACAAGGCGATAGTT  
TACATGAACATATTGCAAATTTAGCTGGTAGCCCTGCTATTA AAAAAGGTATTTTA  
CAGACTGTAAAAGTTGTTGATGAATTGGTCAAAGTAATGGGGCGGCATAAGCCA  
GAAAATATCGTTATTGAAATGGCACGTGAAAATCAGACAACCTCAAAGGGCCAG  
AAAATTCGCGAGAGCGTATGAAACGAATCGAAGAAGGTATCAAAGAATTAGGA  
AGTCAGATTCTTAAAGAGCATCCTGTTGAAAATACTCAATTGCAAATGAAAAGC  
TCTATCTCTATTATCTCCAAAATGGAAGAGACATGTATGTGGACCAAGAATTAGA  
TATTAATCGTTAAGTGATTATGATGTCGATGCCATTGTTCCACAAAGTTTCCTTA

AAGACGATTCAATAGACAATAAGGTCTTAACGCGTTCTGATAAAAATCGTGGTAA  
ATCGGATAACGTTCCAAGTGAAGAAGTAGTCAAAAAGATGAAAACTATTGGAG  
ACAACCTTCTAAACGCCAAGTTAATCACTCAACGTAAGTTTGATAATTTAACGAAA  
GCTGAACGTGGAGGTTTGAGTGAACCTTGATAAAGCTGGTTTTATCAAACGCCAA  
TTGGTTGAAACTCGCCAAATCACTAAGCATGTGGCACAAATTTTGGATAGTCGCA  
TGAATACTAAATACGATGAAAATGATAAACTTATTTCGAGAGGTTAAAGTGATTAC  
CTTAAAATCTAAATTAGTTTCTGACTTCCGAAAAGATTTCCAATTCTATAAAGTAC  
GTGAGATTAACAATTACCATCATGCCATGATGCGTATCTAAATGCCGTCGTTGG  
AACTGCTTTGATTAAGAAATATCCAAAACCTTGAATCGGAGTTTGTCTATGGTGAT  
TATAAAGTTTATGATGTTTCGTAAAATGATTGCTAAGTCTGAGCAAGAAATAGGCA  
AAGCAACCGCAAATATTTCTTTTACTCTAATATCATGAACTTCTTCAAACAGAA  
ATTACACTTGCAAATGGAGAGATTGCAAAACGCCCTCTAATCGAACTAATGGG  
GAACTGGAGAAATTGTCTGGGATAAAGGGCGAGATTTTGCCACAGTGCGCAA  
GTATTGTCCATGCCCAAGTCAATATTGTCAAGAAAACAGAAGTACAGACAGGC  
GGATTCTCAAGGAGTCAATTTTACCAAAAAGAAATTCGGACAAGCTTATTGCTC  
GTAAAAAAGACTGGGATCCAAAAAATATGGTGGTTTTGATAGTCCAACGGTAG  
CTTATTCAGTCCTAGTGGTTGCTAAGGTGGAAAAGGGAAATCGAAGAAGTTAA  
AATCCGTTAAAGAGTTACTAGGGATCACAATTATGGAAAGAAGTTCCTTTGAAAA  
AAATCCGATTGACTTTTTAGAACTAAAGGATATAAGGAAGTTAAAAAAGACTTA  
ATCATTAACTACCTAAATATAGTCTTTTTGAGTTAGAAAACGGTCGTAAACGGA  
TGCTGGCTAGTGCCGGAGAATTACAAAAGGAAATGAGCTGGCTCTGCCAAGC  
AAATATGTGAATTTTTTATATTTAGCTAGTCATTATGAAAAGTTGAAGGGTAGTCC  
AGAAGATAACGAACAAAAACAATTGTTTGTGGAGCAGCATAAGCATTATTTAGAT  
GAGATTATTGAGCAAATCAGTGAATTTTCTAAGCGTGTTATTTTAGCAGATGCCA  
ATTTAGATAAAGTTCTTAGTGATATAACAAACATAGAGACAAACCAATACGTGA  
ACAAGCAGAAAATATTATTCATTTATTTACGTTGACGAATCTTGGAGCTCCCGCT  
GCTTTTAAATATTTTGATACAACAATTGATCGTAAACGATATACGTCTACAAAAGA  
AGTTTTAGATGCCACTCTTATCCATCAATCCATCACTGGTCTTTATGAAACACGC  
ATTGATTTGAGTCAGCTAGGAGGTCCTAGGGGAGGTGGCTCAGAAGGTGGCGG  
ATCTGAAGGTGGCTCTGGAactagtATGAGCGATAAAATTATTCACCTGACTGACG  
ACAGTTTTGACACGGATGTACTCAAAGCGGACGGGGCGATCCTCGTGCATTTCT  
GGGCAGAGTGGTGCGGTCCGTGCAAAATGATCGCCCCGATTCTGGATGAAATC  
GCTGACGAATATCAGGGCAAACCTGACCGTTGCAAACTGAACATCGATCAAAC  
CCTGGCACTGCGCCGAAATATGGCATCCGTGGTATCCCGACTCTGCTGCTGTTC  
AAAAACGGTGAAGTGGCGGCAACCAAAGTGGGTGCACTGTCTAAAGGTCAGTT  
GAAAGAGTTCCTCGACGCTAACCTGGCCGGTTCTGGTTCTGGCCATATGCACCA  
TCATCATCATATTCTTCTGGTCTGGTGCCACGCGGTTCTGGTATGAAAGAAAC  
CGCTGCTGCTAAATTGAAACGCCAGCACATGGACAGCCCAGATCTGGGTACCG  
ACGACGACGACAAGGCCATGGCTGATATCggatccCATATGGAATGATGCTCGAT  
AAGAAACAGATTCGTGCGATCTTTCTTTGAGTTTAAAATGGGTCGCAAAGCG  
GCGGAGACGACGCGTAATATTAACAACGCGTTCGGTCTTGGCACCGCGAACGA  
GCGTACCGTGCAATGGTGGTTCAAAAAGTTTCGCAAAGGGCGACGAATCTCTGGA  
GGACGAAGAGCGTTCTGGCCGCCCGTCCGAGGTTGACAACGACCAGCTGCGTG  
CAATCATCGAAGCTGATCCGCTGACTACCACCCGCGAAGTTGCTGAAGAAGTGA

ATGTGGATCACTCTACTGTGGTTCGCCACCTGAAACAGATCGGTAAAGTAAAA  
AACTGGACAAATGGGTTCCCTCATGAACTGTCTGAAAACCAGAAAAACCGTCGTT  
TCGAAGTTAGCTCCTCTCTGATTCTGCGTAACAACAACGAACCGTTCCTGGATC  
GTATCGTAACCTGTGATGAGAAATGGATTCTGTATGATAACCGTCGCCGCTCTG  
CTCAGTGGCTGGATCGCGAAGAAGCTCCAAAACACTTCCCGAAACCGAATCTGC  
ACCAGAAGAAAGTCATGGTAACCGTATGGTGGTCTGCCGCAGGTGTTATCCACT  
ATTCCTTCCTGAACCCGGGCGAAACTATCACCAGCGAAAAATACTGCCAGCAGA  
TTGACGAAATGCACCGTAAACTGCAGCGTCTGCAGCCAGCACTGGTGAATCGTA  
AAGGTCCGATCCTGCTGCATGATAACGCCCGTCCGCACGTTGCCCAACCGACC  
CTGCAGAACTGAACGAACTGGGCTATGAAGTTCTGCCACACCCGCCGTACTION  
CCGGATCTGTCCCGACTGACTACCATTTCTTCAAGCATCTGGACAACCTCCTG  
CAGGGTAAACGTTTTTACAACCAACAGGACGCAGAAAACGCTTTCCAGGAGTTC  
GTCGAAAGCCGTTCCACTGACTTCTACGCGACCGGTATCAACAAGCTGATCAGC  
CGTTGGCAGAAATGCGTGGACTGTAACGGCAGCTACTTCGATTAAGACGTCTTA  
ATAACTAAAATATGGTATAATACTCTTAATAAATGCAGTAATACAGGGGCTTTTC  
AAGACTGAAGTCTAGCTGAGACAAATAGTGCGATTACGAAATTTTTTAGACAAAA  
ATAGTCTACGAGGTTTTAGAGCTATGCTGTTTTGAATGGTCCCAAACGGTTTTTC  
CCAGTCACGACGTTGTAAAACGAGTTTTAGAGCTATGCTGTTTTGAATGGTCCCA  
AACTTCAGCACACTGAGACTTGTTGAGTTCCATGTTTTAGAGCTATGCTGTTTT  
GAATGGACTCCATTCAACATTGCCGATGATAACTTGAGAAAGAGGGTTAATACC  
AGCAGTCGGATACCTTCCTATTCTTTCTGTTAAAGCGTTTTTCATGTTATAATAGG  
CAAAGAAGAGTAGTGTGATCGTCCATTCCGACAGCATCGCCAGTCACTATGGC  
GTGCTGCTAGCGCTATATGCGTTGATGCAATTTCTATGCGCACCCGTTCTCGGA  
GCACTGTCCGACCGCTTTGGCCGCCGCCAGTCCCTGCTCGCTTCGCTACTTGG  
AGCCACTATCGACTACGCGATCATGGCGACCACACCCGTCCTGTGGATCCTCTA  
CGCCGGACGCATCGTGGCCGGCATCACCGGCGCCACAGGTGCGGTTGCTGGC  
GCCTATATCGCCGACATCACCGATGGGGAAGATCGGGCTCGCCACTTCGGGCT  
CATGAGCGCTTGTTTTCGGCGTGGGTATGGTGGCAGGCCCCCGTGGCCGGGGGA  
CTGTTGGGCGCCATCTCCTTGCATGCACCATTCTTGCGGCGGGCGGTGCTCAA  
CGGCCTCAACCTACTACTGGGCTGCTTCCCTAATGCAGGAGTCGCATAAGGGAG  
AGCGTCGACCGATGCCCTTGAGAGCCTTCAACCCAGTCAGCTCCTTCCGGTGG  
GCGCGGGGCATGACTATCGTCGCCGCACTTATGACTGTCTTCTTTATCATGCAA  
CTCGTAGGACAGGTGCCGGCAGCGCTCTGGGTCATTTTCGGCGAGGACCGCTT  
TCGCTGGAGCGCGACGATGATCGGCCTGTCGCTTGCGGTATTCGGAATCTTGC  
ACGCCCTCGCTCAAGCCTTCGTCACTGGTCCCGCCACCAAACGTTTTCGGCGAG  
AAGCAGGCCATTATCGCCGGCATGGCGGCCGACGCGCTGGGCTACGTCTTGCT  
GGCGTTCGCGACGCGAGGCTGGATGGCCTTCCCATTATGATTCTTCTCGCTTC  
CGGCGGCATCGGGATGCCCGCGTTGCAGGCCATGCTGTCCAGGCAGGTAGAT  
GACGACCATCAGGGACAGCTTCAAGGATCGCTCGCGGCTCTTACCAGCCTAAC  
TTCGATCATTGGACCGCTGATCGTCACGGCGATTTATGCCGCCTCGGCGAGCA  
CATGGAACGGGTTGGCATGGATTGTAGGCGCCGCCCTATACCTTGTCTGCCTC  
CCGCGGTTGCGTGCAGGTGCATGGAGCCGGGCCACCTCGACCTGAATGGAAG  
CCGGCGGCACCTCGCTAACGGATTCACCACTCCAAGAATTGGAGCCAATCAATT  
CTTGCGGAGAACTGTGAATGCGCAAACCAACCTTGGCAGAACATATCCATCGC

GTCCGCCATCTCCAGCAGCCGCACGCGGGCGCATCTCGGGCAGCGTTGGGTCCCT  
GGCCACGGGTGCGCATGATCGTGCTCCTGTGCGTTGAGGACCCGGCTAGGCTGG  
CGGGGTTGCCCTTACTGGTTAGCAGAATGAATCACCGATACGCGAGCGAACGTG  
AAGCGACTGCTGCTGCAAACGTCTGCGACCTGAGCAACAACATGAATGGTCTT  
CGGTTTCCGTGTTTCGTAAAGTCTGGAAACGCGGAAGTCCCCTACGTGCTGCTG  
AAGTTGCCCGCAACAGAGAGTGGAACCAACCGGTGATACCACGATACTATGACT  
GAGAGTCAACGCCATGAGCGGCCTCATTTCTTATTCTGAGTTACAACAGTCCGC  
ACCGCTGTCCGGTAGCTCCTTCCGGTGGGCGCGGGGCATGACTATCGTCGCCG  
CACTTATGACTGTCTTCTTTATCATGCAACTCGTAGGACAGGTGCCGGCAGCGC  
CCAACAGTCCCCCGGCCACGGGGCCTGCCACCATACCACGCCGAAACAAGC  
GCCCTGCACCATTATGTTCCGGATCTGCATCGCAGGATGCTGCTGGCTACCCTG  
TGGAACACCTACATCTGTATTAACGAAGCGCTAACCGTTTTTATCAGGCTCTGG  
GAGGCAGAATAAATGATCATATCGTCAATTATTACCTCCACGGGGAGAGCCTGA  
GCAAACCTGGCCTCAGGCATTTGAGAAGCACACGGTCACACTGCTTCCGGTAGTC  
AATAAACCGGTAAACCAGCAATAGACATAAGCGGCTATTTAACGACCCTGCCCT  
GAACCGACGACCGGGTCAATTTGCTTTCAATTTCTGCCATTCATCCGCTTATT  
ATCACTTATTCAGGCGTAGCACCAGGCGTTTAAAGGGCACCAATAACTGCCTTAA  
AAAAATTACGCCCCGCCCTGCCACTCATCGCAGTACTGTTGTAATTCATTAAGCA  
TTCTGCCGACATGGAAGCCATCACAGACGGCATGATGAACCTGAATCGCCAGC  
GGCATCAGCACCTTGTCGCCTTGCGTATAATATTTGCCCATGGTGAAAACGGGG  
GCGAAGAAGTTGTCCATATTGGCCACGTTTAAATCAAACCTGGTGAAACTCACC  
CAGGGATTGGCTGAGACGAAAAACATATTCTCAATAAACCTTTAGGGAAATAG  
GCCAGGTTTTACCGTAACACGCCACATCTTGCGAATATATGTGTAGAAACTGC  
CGGAAATCGTCGTGGTATTCACTCCAGAGCGATGAAAACGTTTCAGTTTGCTCA  
TGGAACCGGTGTAACAAGGGTGAACACTATCCCATATCACCAGCTCACCCTCT  
TTCATTGCCATACG

pRC2306

GAATTCGGATGAGCATTATCAGGCGGGCAAGAATGTGAATAAAGGCCGGAT  
AAAACCTTGCTTATTTTTCTTTACGGTCTTTAAAAGGCCGTAATATCCAGCTGA  
ACGGTCTGGTTATAGGTACATTGAGCAACTGACTGAAATGCCTCAAATGTTCTT  
TACGATGCCATTGGGATATATCAACGGTGGTATATCCAGTGATTTTTTTCTCCAT  
TTTAGCTTCCTTAGCTCCTGAAAATCTCGATAACTCAAAAAATACGCCCGGTAGT  
GATCTTATTTCAATTATGGTGAAAGTTGGAACCTCTTACGTGCCGATCAACGTCTC  
ATTTTCGCCAAAAGTTGGCCCAGGGCTTCCCGGTATCAACAGGGACACCAGGAT  
TTATTTATTCTGCGAAGTGATCTTCCGTCACAGGTATTTATTCGGCGCAAAGTGC  
GTCGGGTGATGCTGCCAACTTACTGATTTAGTGTATGATGGTGTTTTTGAGGTG  
CTCCAGTGGCTTCTGTTTCTATCAGCTGTCCCTCCTGTTTCAGCTACTGACGGGG  
TGGTGCGTAACGGCAAAGCACCGCCGGACATCAGCGCTAGCGGAGTGATAC  
TGGCTTACTATGTTGGCACTGATGAGGGTGTGAGTGAAGTGCTTCATGTGGCAG  
GAGAAAAAAGGCTGCACCGGTGCGTCAGCAGAATATGTGATACAGGATATATTC  
CGCTTCCTCGCTCACTGACTCGCTACGCTCGGTGCTTCGACTGCGGCGAGCGG  
AAATGGCTTACGAACGGGGCGGAGATTTCTGGAAGATGCCAGGAAGATACTTA

ACAGGGAAGTGAGAGGGCCGCGGCAAAGCCGTTTTTCCATAGGCTCCGCCCC  
CTGACAAGCATCACGAAATCTGACGCTCAAATCAGTGGTGGCGAAACCCGACA  
GGACTATAAAGATACCAGGCGTTTCCCCTGGCGGCTCCCTCGTGCCTCTCT  
GTTCTGCTTTTCGTTTACCGGTGTCATTCCGCTGTTATGGCCGCGTTTGTCT  
CATTCCACGCCTGACACTCAGTTCGGGTAGGCAGTTCGCTCCAAGCTGGACT  
GTATGCACGAACCCCCGTTTCCAGTCCGACCGCTGCGCCTTATCCGGTAACTATC  
GTCTTGAGTCCAACCCGAAAGACATGCAAAGCACCACTGGCAGCAGCCACT  
GGTAATTGATTTAGAGGAGTTAGTCTTGAAGTCATGCGCCGGTTAAGGCTAAAC  
TGAAAGGACAAGTTTTGGTGACTGCGCTCCTCCAAGCCAGTTACCTCGGTTCAA  
AGAGTTGGTAGCTCAGAGAACCCTTCGAAAACCGCCCTGCAAGGCGGTTTTTTC  
GTTTTCAGAGCAAGAGATTACGCGCAGACCAAACGATCTCAAGAAGATCATCT  
TATTAATCAGATAAAATATTTCTAGATTTTCAAGTGCATTTTATCTCTTCAAATGTAG  
CACCTGAAGTCAGCCCCATACGATATAAGTTGTAATTCTCATGTTTGACAGCTTA  
TCATCGATAAGCTTTAATGCGGTAGTTTATCACAGTTAAATTGCTAACGCAGTCA  
GGCACCGTGTATGAAATCTAACAATGCGCTCATCGTCATCCTCGGCACCGTCAC  
CCTGGATGCTGTAGGCATAGGCTTGGTTATGCCGGTACTGCCGGGCCTCTTGC  
GGGATTACGAAATCATCCTGTGGAGCTTAGTAGGTTTAGCAAGATGGCAGCGCC  
TAAATGTAGAATGATAAAAGGATTAAGAGATTAATTTCCCTAAAATGATAAAACA  
AGCGTTTTGAAAGCGCTTGTTTTTTTGGTTTGCAGTCAGAGTAGAATAGAAGTAT  
CAAAAAAGCACCGACTCGGTGCCACTTTTTCAAGTTGATAACGGACTAGCCTT  
ATTTAACTTGCTATGCTGTTTTGAATGGTTCCAACAAGATTATTTTATAACTTTTA  
TAACAATAATCAAGGAGAAATTCAAAGAAATTTATCAGCCATAAAACAATACTTA  
ATACTATAGAATGATAACAAAATAAACTACTTTTTAAAAGAATTTTGTGTTATAATC  
TATTTATTATTAAGTATTGGGTAATATTTTTTGAAGAGATATTTTAAAAAGAAAA  
TTAAAGCATATTAACCTAATTTTCGGAGGTCATTAAACTATTATTGAAATCATCAA  
ACTCATTATGGATTTAATTTAACTTTTTATTTTAGGAGGCAACATATGGAAATGA  
TGCTCGATAAGAAACAGATTCGTGCGATCTTCTCTTTGAGTTTAAAATGGGTCG  
CAAAGCGGCGGAGACGACGCGTAATATTAACAACGCGTTCGGTCTGACCG  
CGAACGAGCGTACCGTGCAATGGTGGTTCAAAAAGTTTCGCAAAGGCGACGAA  
TCTCTGGAGGACGAAGAGCGTTCTGGCCGCCGTCCGAGGTTGACAACGACCA  
GCTGCGTGCAATCATCGAAGCTGATCCGCTGACTACCACCCGCGAAGTTGCTG  
AAGAACTGAATGTGGATCACTCTACTGTGGTTCGCCACCTGAAACAGATCGGTA  
AAGTAAAAAACTGGACAAATGGGTTCTCATGAACTGTCTGAAAACCAGAAAA  
CCGTCGTTTCGAAGTTAGCTCCTCTCTGATTCTGCGTAACAACAACGAACCGTT  
CCTGGATCGTATCGTAACCTGTGATGAGAAATGGATTCTGTATGATAACCGTCG  
CCGCTCTGCTCAGTGGCTGGATCGCGAAGAAGCTCCAAAACACTTCCCGAAAC  
CGAATCTGCACCAGAAGAAAGTCATGGTAACCGTATGGTGGTCTGCCGCAGGT  
GTTATCCACTATTCCTTCTGAACCCGGGCGAACTATCACCAGCGAAAAATACT  
GCCAGCAGATTGACGAAATGCACCGTAACTGCAGCGTCTGCAGCCAGCACTG  
GTGAATCGTAAAGGTCCGATCCTGCTGCATGATAACGCCCGTCCGCACGTTGCC  
CAACCGACCCTGCAGAACTGAACGAACCTGGGCTATGAAGTTCTGCCACACCC  
GCCGTACTCCCGGATCTGTCCCGACTGACTACCATTTCTTCAAGCATCTGGA  
CAACTTCTGCAGGGTAAACGTTTTTCAACAACCAACAGGACGCAGAAAACGCTTT  
CCAGGAGTTCGTGAAAGCCGTTCCACTGACTTCTACGCGACCGGTATCAACAA

GCTGATCAGCCGTTGGCAGAAATGCGTGGACTGTAACGGCAGCTACTTCGATTA  
AGGATCCTCTAGAGTCGACCGATGCCCTTGAGAGCCTTCAACCCAGTCAGCTCC  
TTCCGGTGGGCGCGGGGCATGACTATCGTCGCCGCACTTATGACTGTCTTCTTT  
ATCATGCAACTCGTAGGACAGGTGCCGGCAGCGCTCTGGGTCATTTTCGGCGA  
GGACCGCTTTCGCTGGAGCGCGACGATGATCGGCCTGTCGCTTGCGGTATTGCG  
GAATCTTGACGCCCTCGCTCAAGCCTTCGTCACTGGTCCCGCCACCAAACGTT  
TCGGCGAGAAGCAGGCCATTATCGCCGGCATGGCGGCCGACGCGCTGGGCTA  
CGTCTTGCTGGCGTTCGCGACGCGAGGCTGGATGGCCTTCCCCATTATGATTCT  
TCTCGCTTCCGGCGGCATCGGGATGCCCGCGTTGCAGGCCATGCTGTCCAGGC  
AGGTAGATGACGACCATCAGGGACAGCTTCAAGGATCGCTCGCGGCTCTTACC  
AGCCTAACTTCGATCATTGGACCGCTGATCGTCACGGCGATTTATGCCGCCTCG  
GCGAGCACATGGAACGGGTGGCATGGATTGTAGGCGCCGCCCTATACCTTGT  
CTGCCTCCCCGCGTTGCGTCGCGGTGCATGGAGCCGGGCCACCTCGACCTGAA  
TGGAAGCCGGCGGCACCTCGCTAACGGATTCACTCCAAGAATTGGAGCCA  
ATCAATTCTTGGGAGAACTGTGAATGCGCAAACCAACCCTTGGCAGAACATAT  
CCATCGCGTCCGCCATCTCCAGCAGCCGCACGCGGCATCTCGGGCAGCGTT  
GGGTCTTGGCCACGGGTGCGCATGATCGTGCTCCTGTGCTTGAGGACCCGGCT  
AGGCTGGCGGGGTTGCCTTACTGGTTAGCAGAATGAATCACCGATAACGCGAGC  
GAACGTGAAGCGACTGCTGCTGCAAAACGTCTGCGACCTGAGCAACAACATGA  
ATGGTCTTCGGTTTCCGTGTTTCGTAAAGTCTGGAAACGCGGAAGTCCCCTACG  
TGCTGCTGAAGTTGCCCGAACAGAGAGTGGAACCAACCGGTGATAACCACGAT  
ACTATGACTGAGAGTCAACGCCATGAGCGGCCTCATTTCTTATTCTGAGTTACAA  
CAGTCCGCACCGCTGTCCGGTAGCTCCTTCCGGTGGGCGCGGGGCATGACTAT  
CGTCGCCGCACTTATGACTGTCTTCTTTATCATGCAACTCGTAGGACAGGTGCC  
GGCAGCGCCCAACAGTCCCCCGGCCACGGGGCCTGCCACCATAACCACGCCG  
AAACAAGCGCCCTGCACCATTATGTTCCGGATCTGCATCGCAGGATGCTGCTGG  
CTACCCTGTGGAACACCTACATCTGTATTAACGAAGCGCTAACCGTTTTTATCAG  
GCTCTGGGAGGCAGAATAAATGATCATATCGTCAATTATTACCTCCACGGGGAG  
AGCCTGAGCAAACCTGGCCTCAGGCATTTGAGAAGCACACGGTCACACTGCTTCC  
GGTAGTCAATAAACCGGTAAACCAGCAATAGACATAAGCGGCTATTTAACGACC  
CTGCCCTGAACCGACGACCGGGTCGAATTTGCTTTTGAATTTCTGCCATTCATC  
CGCTTATTATCACTTATTCAGGCGTAGCACCAGGCGTTTAAGGGCACCAATAAC  
TGCCTTAAAAAATTACGCCCCGCCCTGCCACTCATCGCAGTACTGTTGTAATTC  
ATTAAGCATTCTGCCGACATGGAAGCCATCACAGACGGCATGATGAACCTGAAT  
CGCCAGCGGCATCAGCACCTTGTGCGCCTTGCGTATAATATTTGCCCATGGTGAA  
AACGGGGGCGAAGAAGTTGTCCATATTGGCCACGTTTAAATCAAACCTGGTGAA  
ACTACCCAGGGATTGGCTGAGACGAAAACATATTCTCAATAAACCCTTTAGG  
GAAATAGGCCAGGTTTTACCGTAACACGCCACATCTTGCGAATATATGTGTAG  
AAACTGCCGGAAATCGTCGTGGTATTCCTCCAGAGCGATGAAAACGTTTCAGT  
TTGCTCATGGAAAACGGTGTAACAAGGGTGAACACTATCCCATATCACCGCTC  
ACCGTCTTTCATTGCCATACG

GAATTCCGGATGAGCATTTCATCAGGCGGGCAAGAATGTGAATAAAGGCCGGAT  
AAAAC TTGTGCTTATTTTTCTTTACGGTCTTTAAAAAGGCCGTAATATCCAGCTGA  
ACGGTCTGGTTATAGGTACATTGAGCAACTGACTGAAATGCCTCAAAATGTTCTT  
TACGATGCCATTGGGATATATCAACGGTGGTATATCCAGTGATTTTTTTCTCCAT  
TTAGCTTCCTTAGCTCCTGAAAATCTCGATAACTCAAAAAATACGCCCGGTAGT  
GATCTTATTTTATTATGGTGAAAGTTGGAACCTCTTACGTGCCGATCAACGTCTC  
ATTTTCGCCAAAAGTTGGCCCAGGGCTTCCCGGTATCAACAGGGACACCAGGAT  
TTATTTATTCTGCGAAGTGATCTTCCGTACAGGTATTTATTTCGGCGCAAAGTGC  
GTCGGGTGATGCTGCCAACTTACTGATTTAGTGTATGATGGTGTTTTTGAGGTG  
CTCCAGTGGCTTCTGTTTTCTATCAGCTGTCCCTCCTGTTTCAGCTACTGACGGGG  
TGGTGCGTAACGGCAAAGCACCGCCGGACATCAGCGCTAGCGGAGTGTATAC  
TGGCTTACTATGTTGGCACTGATGAGGGTGTGAGTGAAGTGCTTCATGTGGCAG  
GAGAAAAAGGCTGCACCGGTGCGTCAGCAGAATATGTGATACAGGATATATTC  
CGCTTCCTCGCTCACTGACTCGCTACGCTCGGTCTGTTTCGACTGCGGCGAGCGG  
AAATGGCTTACGAACGGGGCGGAGATTTCTGGAAGATGCCAGGAAGATACTTA  
ACAGGGAAGTGAGAGGGCCGCGCAAAGCCGTTTTTTCATAGGCTCCGCCCCC  
CTGACAAGCATCACGAAATCTGACGCTCAAATCAGTGGTGGCGAAACCCGACA  
GGACTATAAAGATACCAGGCGTTTTCCCCTGGCGGCTCCCTCGTGCGCTCTCCT  
GTTCTGCTTTTCGGTTTACCGGTGTCATTCCGCTGTTATGGCCGCGTTTGTCT  
CATTCCACGCCTGACACTCAGTTCGGGGTAGGCAGTTCGCTCCAAGCTGGACT  
GTATGCACGAACCCCCGTTTCAGTCCGACCGCTGCGCCTTATCCGGTAACTATC  
GTCTTGAGTCCAACCCGGAAAGACATGCAAAGCACCACTGGCAGCAGCCACT  
GGTAATTGATTTAGAGGAGTTAGTCTTGAAGTCATGCGCCGGTTAAGGCTAAAC  
TGAAAGGACAAGTTTTGGTGACTGCGCTCCTCCAAGCCAGTTACCTCGGTTCAA  
AGAGTTGGTAGCTCAGAGAACCCTTCGAAAAACCGCCCTGCAAGGCGGTTTTTTC  
GTTTTCAGAGCAAGAGATTACGCGCAGACCAAACGATCTCAAGAAGATCATCT  
TATTAATCAGATAAAATATTTCTAGATTTTCAGTGCAATTTATCTCTTCAAATGTAG  
CACCTGAAGTCAGCCCCATACGATATAAGTTGTAATTCTCATGTTTGACAGCTTA  
TCATCGATAAGCTTTAATGCGGTAGTTTATCACAGTTAAATTGCTAACGCAGTCA  
GGCACCGTGTATGAAATCTAACAATGCGCTCATCGTCATCCTCGGCACCGTCCAC  
CCTGGATGCTGTAGGCATAGGCTTGGTTATGCCGGTACTGCCGGGCCTCTTGC  
GGGATTACGAAATCATCCTGTGGAGCTTAGTAGGTTTAGCAAGATGGCAGCGCC  
TAAATGTAGAATGATAAAAGGATTAAGAGATTAATTTCCCTAAAAATGATAAAACA  
AGCGTTTTGAAAGCGCTTGTTTTTTTGGTTTGCAGTCAGAGTAGAATAGAAGTAT  
CAAAAAAAGCACCGACTCGGTGCCACTTTTTCAAGTTGATAACGGACTAGCCTT  
ATTTAACTTGCTATGCTGTTTTGAATGGTTCCAACAAGATTATTTTATAACTTTTA  
TAACAAATAATCAAGGAGAAATTCAAAGAAATTTATCAGCCATAAAACAATACTTA  
ATACTATAGAATGATAACAAAATAAACTACTTTTTAAAAGAATTTTGTGTTATAATC  
TATTTATTATTAAGTATTGGGTAATATTTTTTTGAAGAGCGGCCGCGCACGATCTC  
GACACTCGAGATGGATAAGAAATACTCAATAGGCTTAGCTATCGGCACAAATAG  
CGTCGGATGGGCGGTGATCACTGATGAATATAAGGTTCCGTCTAAAAAGTTCAA  
GGTTCTGGGAAATACAGACCGCCACAGTATCAAAAAAATCTTATAGGGGCTCT  
TTTATTTGACAGTGGAGAGACAGCGGAAGCGACTCGTCTCAAACGGACAGCTC  
GTAGAAGGTATACACGTCCGAAGAATCGTATTTGTTATCTACAGGAGATTTTTTC



AAATGAGATGGCGAAAGTAGATGATAGTTTCTTTCATCGACTTGAAGAGTCTTTT  
TTGGTGGAGAAGACAAGAAGCATGAACGTCATCCTATTTTTGGAAATATAGTAG  
ATGAAGTTGCTTATCATGAGAAATATCCAACCTATCTATCATCTGCGAAAAAATT  
GGTAGATTCTACTGATAAAGCGGATTTGCGCTTAATCTATTTGGCCTTAGCGCAT  
ATGATTAAGTTTCGTGGTCATTTTTTATTGATTGAGGGAGATTTAAATCCTGATAATAG  
TGATGTGGACAAACTATTTATCCAGTTGGTACAAACCTACAATCAATTATTTGAA  
GAAAACCCTATTAACGCAAGTGGAGTAGATGCTAAAGCGATTCTTTCTGCACGA  
TTGAGTAAATCAAGACGATTAGAAAATCTCATTGCTCAGCTCCCCGGTGAGAAG  
AAAAATGGCTTATTTGGGAATCTCATTGCTTTGTCATTGGGTTTGACCCCTAATT  
TTAAATCAAATTTTATTGTTTGGCAGAAGATGCTAAATTACAGCTTTCAAAGATACT  
TACGATGATGATTTAGATAATTTATTGGCGCAAATTGGAGATCAATATGCTGATT  
TGTTTTTGGCAGCTAAGAATTTATCAGATGCTATTTTACTTTTACAGATATCCTAAGA  
GTAAATACTGAAATAACTAAGGCTCCCCTATCAGCTTCAATGATTAACGCTACG  
ATGAACATCATCAAGACTTGACTCTTTTAAAAGCTTTAGTTTCGACAACAACCTCC  
AGAAAAGTATAAAGAAATCTTTTTTATCAATCAAAAAACGGATATGCAGGTTAT  
ATTGATGGGGGAGCTAGCCAAGAAGAATTTTATAAATTTATCAAACCAATTTTAG  
AAAAATGGATGGTACTGAGGAATTATTGGTGAAACTAAATCGTGAAGATTTGCT  
GCGCAAGCAACGGACCTTTGACAACGGCTCTATTCCCATCAAATCACTTGGG  
TGAGCTGCATGCTATTTTGAAGAAGACAAGAAGACTTTTATCCATTTTTAAAAGAC  
AATCGTGAGAAGATTGAAAAAATCTTGACTTTTCGAATTCCTTATTATGTTGGTCC  
ATTGGCGCGTGGAATAGTCGTTTTGCATGGATGACTCGGAAGTCTGAAGAAAC  
AATTACCCCATGGAATTTTGAAGAAGTTGTGATAAAGGTGCTTCAGCTCAATCA  
TTTATTGAACGCATGACAACTTTGATAAAAATCTTCAAATGAAAAAGTACTACC  
AAACATAGTTTGCTTTATGAGTATTTTACGGTTTATAACGAATTGACAAAGGTCA  
AATATGTTACTGAAGGAATGCGAAAACCAGCATTCTTTTCAAGGTGAACAGAAGAA  
AGCCATTGTTGATTTACTCTTCAAACAATCGAAAAGTAACCGTTAAGCAATTA  
AAAGAAGATTATTTCAAAAAAATAGAATGTTTTGATAGTGTGAAATTTCAAGGAGT  
TGAAGATAGATTTAATGCTTCATTAGGTACCTACCATGATTTGCTAAAAATTATTA  
AAGATAAAGATTTTTTGGATAATGAAGAAAATGAAGATATCTTAGAGGATATTGTT  
TTAACATTGACCTTATTTGAAGATAGGGAGATGATTGAGGAAAGACTTAAACAT  
ATGCTCACCTCTTTGATGATAAGGTGATGAAACAGCTTAAACGTCGCCGTTATAC  
TGGTTGGGGACGTTTGTCTCGAAAATTGATTAATGGTATTAGGGATAAGCAATCT  
GGCAAAACAATATTAGATTTTTTGAATCAGATGGTTTTGCCAATCGCAATTTTAT  
GCAGCTGATCCATGATGATAGTTTACATTAAGAAGACATTCAAAAAGCACAA  
GTGTCTGGACAAGGCGATAGTTTACATGAACATATTGCAAATTTAGCTGGTAGC  
CCTGCTATTA AAAAAGGTATTTTACAGACTGTAAAAGTTGTTGATGAATTGGTCA  
AAGTAATGGGGCGGCATAAGCCAGAAAATATCGTTATTGAAATGGCACGTGAAA  
ATCAGACAACCTCAAAGGGCCAGAAAATTCGCGAGAGCGTATGAAACGAATCG  
AAGAAGGTATCAAAGAATTAGGAAGTCAGATTCTTAAAGAGCATCCTGTTGAAAA  
TACTCAATTGCAAATGAAAAGCTCTATCTCTATTATCTCCAAAATGGAAGAGAC  
ATGTATGTGGACCAAGAATTAGATATTAATCGTTTAAAGTATTATGATGTCGATG  
CCATTGTTCCACAAAGTTTCTTAAAGACGATTCAATAGACAATAAGGTCTTAAC  
GCGTTCTGATAAAAATCGTGGTAAATCGGATAACGTTCCAAGTGAAGAAGTAGT  
CAAAAAGATGAAAACTATTGGAGACAACCTTCTAAACGCCAAGTTAATCACTCAA

CGTAAGTTTGATAATTTAACGAAAGCTGAACGTGGAGGTTTGAGTGAACCTTGATA  
AAGCTGGTTTTATCAAACGCCAATTGGTTGAAACTCGCCAAATCACTAAGCATGT  
GGCACAAATTTTGGATAGTCGCATGAATACTAAATACGATGAAAATGATAAACTT  
ATTCGAGAGGTTAAAGTGATTACCTTAAAATCTAAATTAGTTTCTGACTTCCGAAA  
AGATTTCCAATTCTATAAAGTACGTGAGATTAACAATTACCATCATGCCCATGAT  
GCGTATCTAAATGCCGTCGTTGGAAGCTGCTTTGATTAAGAAATATCCAAAACCTTG  
AATCGGAGTTTGTCTATGGTGATTATAAAGTTTATGATGTTTCGTA AAAATGATTGCT  
AAGTCTGAGCAAGAAATAGGCAAAGCAACCGCAAATATTTCTTTTACTCTAATA  
TCATGAACTTCTTCAAACAGAAATTACACTTGCAAATGGAGAGATTTCGCAAACG  
CCCTCTAATCGAAACTAATGGGGAAACTGGAGAAATTGTCTGGGATAAAGGGCG  
AGATTTTGCCACAGTGC GCAAAGTATTGTCCATGCCCAAGTCAATATTGTCAAG  
AAACAGAAGTACAGACAGGCGGATTCTCCAAGGAGTCAATTTTACCAAAAAGA  
AATTCGGACAAGCTTATTGCTCGTAAAAAAGACTGGGATCCAAAAAATATGGTG  
GTTTTGATAGTCCAACGGTAGCTTATT CAGTCCTAGTGGTTGCTAAGGTGGAAAA  
AGGGAAATCGAAGAAGTTAAATCCGTTAAAGAGTTACTAGGGATCACAATTATG  
GAAAGAAGTTCCTTTGAAAAAATCCGATTGACTTTTTAGAAAGCTAAAGGATATA  
AGGAAGTTAAAAAAGACTTAATCATTAAACTACCTAAATATAGTCTTTTTGAGTTA  
GAAAACGGTCGTAAACGGATGCTGGCTAGTGCCGGAGAATTACAAAAGGAAAT  
GAGCTGGCTCTGCCAAGCAAATATGTGAATTTTTTATATTTAGCTAGTCATTATG  
AAAAGTTGAAGGGTAGTCCAGAAGATAACGAACAAAAACAATTGTTTGTGGAGC  
AGCATAAGCATTATTTAGATGAGATTATTGAGCAAATCAGTGAATTTTCTAAGCG  
TGTTATTTTAGCAGATGCCAATTTAGATAAAGTTCTTAGTGCATATAACAAACATA  
GAGACAAACCAATACGTGAACAAGCAGAAAATATTATTCATTTATTTACGTTGAC  
GAATCTTGGAGCTCCCGCTGCTTTTAAATATTTTGATACAACAATTGATCGTAAA  
CGATATACGTCTACAAAAGAAGTTTTAGATGCCACTCTTATCCATCAATCCATCA  
CTGGTCTTTATGAAACACGCATTGATTTGAGTCAGCTAGGAGGTCCTAGGGGAG  
GTGGCTCAGAAGGTGGCGGATCTGAAGGTGGCTCTGGAactagtATGAGCGATAA  
AATTATTCACCTGACTGACGACAGTTTTGACACGGATGTA CTCAAAGCGGACGG  
GGCGATCCTCGTCGATTTCTGGGCAGAGTGGTGCGGTCCGTGCAAATGATCG  
CCCCGATTCTGGATGAAATCGCTGACGAATATCAGGGCAA ACTGACCGTTGCAA  
AACTGAACATCGATCAAACCCTGGCACTGCGCCGAAATATGGCATCCGTGGTA  
TCCCGACTCTGCTGCTGTTCAAAAACGGTGAAGTGGCGGCAACCAAAGTGGGT  
GCACTGTCTAAAGGTCAGTTGAAAGAGTTCCTCGACGCTAACCTGGCCGTTCT  
GGTTCTGGCCATATGCACCATCATCATCATTCTTCTGGTCTGGTGCCACGC  
GGTTCTGGTATGAAAGAAACCGCTGCTGCTAAATTCGAACGCCAGCACATGGAC  
AGCCCAGATCTGGGTACCGACGACGACGACAAGGCCATGGCTGATATCggatccC  
ATATGGAAATGATGCTCGATAAGAAACAGATTCGTGCGATCTTCTCTTTGAGTT  
TAAAATGGGTCGCAAAGCGGCGGAGACGACGCGTAATATTAACAACGCGTTCCG  
GTCCTGGCACCGCGAACGAGCGTACCGTGCAATGGTGGTTCAAAAAGTTTCGC  
AAAGGCGACGAATCTCTGGAGGACGAAGAGCGTTCTGGCCGCCCGTCCGAGGT  
TGACAACGACCAGCTGCGTGCAATCATCGAAGCTGATCCGCTGACTACCACCC  
GCGAAGTTGCTGAAGA ACTGAATGTGGATCACTCTACTGTGGTTCGCCACCTGA  
AACAGATCGGTAAAGTAAAAAACTGGACAAATGGGTTCTCATGAACTGTCTG  
AAAACCAGAAAACCGTCGTTTCGAAGTTAGCTCCTCTCTGATTCTGCGTAACAA

CAACGAACCGTTCCTGGATCGTATCGTAACCTGTGATGAGAAATGGATTCTGTA  
TGATAACCGTCGCCGCTCTGCTCAGTGGCTGGATCGCGAAGAAGCTCCAAAAC  
ACTTCCCGAAACCGAATCTGCACCAGAAGAAAGTCATGGTAACCGTATGGTGGT  
CTGCCGCAGGTGTTATCCACTATTCCTTCCTGAACCCGGGCGAAACTATCACCA  
GCGAAAAATACTGCCAGCAGATTGACGAAATGCACCGTAAACTGCAGCGTCTGC  
AGCCAGCACTGGTGAATCGTAAAGGTCCGATCCTGCTGCATGATAACGCCCGTC  
CGCACGTTGCCCAACCGACCCTGCAGAAACTGAACGAACCTGGGCTATGAAGTT  
CTGCCACACCCGCCGTACTIONCCCGGATCTGTCCCGACTGACTACCATTCTTC  
AAGCATCTGGACAACCTCCTGCAGGGTAAACGTTTTTCACAACCAACAGGACGCA  
GAAAACGCTTTCAGGAGTTCGTGCGAAAGCCGTTCCACTGACTTCTACGCGACC  
GGTATCAACAAGCTGATCAGCCGTTGGCAGAAATGCGTGGACTGTAACGGCAG  
CTACTTCGATTAAGACGTCTTAATAACTAAAATATGGTATAATACTCTTAATAAA  
TGCAGTAATACAGGGGCTTTTTCAAGACTGAAGTCTAGCTGAGACAAATAGTGCG  
ATTACGAAATTTTTTAGACAAAAATAGTCTACGAGGTTTTAGAGCTATGCTGTTTT  
GAATGGTCCCAAACGGTTTTCCAGTCACGACGTTGTAAAACGAGTTTTAGAG  
CTATGCTGTTTTGAATGGTCCCAAACCTCAGCACACTGAGACTTGTTGAGTTCC  
ATGTTTTAGAGCTATGCTGTTTTGAATGGACTCCATTCAACATTGCCGATGATAA  
CTTGAGAAAGAGGGTTAATACCAGCAGTCGGATACCTTCCTATTCTTTCTGTAA  
AGCGTTTTTCATGTTATAATAGGCAAAGAAGAGTAGTGTGATCGTCCATTCCGAC  
AGCATCGCCAGTCACTATGGCGTGCTGCTAGCGCTATATGCGTTGATGCAATTT  
CTATGCGCACCCGTTCTCGGAGCACTGTCCGACCGCTTTGGCCGCCGCCAGT  
CCTGCTCGCTTCGCTACTTGGAGCCACTATCGACTACGCGATCATGGCGACCAC  
ACCCGTCCTGTGGATCCTCTACGCCGGACGCATCGTGGCCGGCATCACCGGCG  
CCACAGGTGCGGTTGCTGGCGCCTATATCGCCGACATCACCGATGGGGAAGAT  
CGGGCTCGCCACTTCGGGCTCATGAGCGCTTGTTTCGGCGTGGGTATGGTGGC  
AGGCCCCGTGGCCGGGGGACTGTTGGGCGCCATCTCCTTGCATGCACCATTCC  
TTGCGGGCGGCGGTGCTCAACGGCCTCAACCTACTACTGGGCTGCTTCCTAATG  
CAGGAGTCGCATAAGGGAGAGCGTCGACCGATGCCCTTGAGAGCCTTCAACCC  
AGTCAGCTCCTTCCGGTGGGCGCGGGGCATGACTATCGTCGCCGCACTTATGA  
CTGTCTTCTTTATCATGCAACTCGTAGGACAGGTGCCGGCAGCGCTCTGGGTCA  
TTTTCGGCGAGGACCGCTTTCGCTGGAGCGCGACGATGATCGGCCTGTGCTT  
GCGGTATTCGGAATCTTGCACGCCCTCGCTCAAGCCTTCGTCACTGGTCCCGC  
CACCAAACGTTTCGGCGAGAAGCAGGCCATTATCGCCGGCATGGCGGCCGACG  
CGCTGGGCTACGTCTTGCTGGCGTTCGCGACGCGAGGCTGGATGGCCTTCCCC  
ATTATGATTCTTCTCGCTTCCGGCGGCATCGGGATGCCCGCGTTGCAGGCCATG  
CTGTCCAGGCAGGTAGATGACGACCATCAGGGACAGCTTCAAGGATCGCTCGC  
GGCTCTTACCAGCCTAACTTCGATCATTGGACCGCTGATCGTCACGGCGATTTA  
TGCCGCCTCGGCGAGCACATGGAACGGGTTGGCATGGATTGTAGGCGCCGCC  
CTATACCTTGTCTGCCTCCCCGCGTTGCGTCGCGGTGCATGGAGCCGGGCCAC  
CTCGACCTGAATGGAAGCCGGCGGCACCTCGCTAACGGATTCACCACTCCAAG  
AATTGGAGCCAATCAATTCTTGCGGAGAAGTGTGAATGCGCAAACCAACCCTTG  
GCAGAACATATCCATCGCGTCCGCCATCTCCAGCAGCCGCACGCGGGCGCATCT  
CGGGCAGCGTTGGGTCTGGCCACGGGTGCGCATGATCGTCTCCTGTGCTTG  
AGGACCCGGCTAGGCTGGCGGGGTTGCCTTACTGGTTAGCAGAATGAATCACC

GATACGCGAGCGAACGTGAAGCGACTGCTGCTGCAAAACGTCTGCGACCTGAG  
CAACAACATGAATGGTCTTCGGTTTCCGTGTTTCGTAAAGTCTGGAAACGCGGA  
AGTCCCCTACGTGCTGCTGAAGTTGCCCGCAACAGAGAGTGGAAACCAACCGGT  
GATACCACGATACTATGACTGAGAGTCAACGCCATGAGCGGCCTCATTCTTAT  
TCTGAGTTACAACAGTCCGCACCGCTGTCCGGTAGCTCCTTCCGGTGGGCGCG  
GGGCATGACTATCGTCGCCGCACTTATGACTGTCTTCTTTATCATGCAACTCGTA  
GGACAGGTGCCGGCAGCGCCCAACAGTCCCCCGGCCACGGGGCCTGCCACCA  
TACCCACGCCGAAACAAGCGCCCTGCACCATTATGTTCCGGATCTGCATCGCAG  
GATGCTGCTGGCTACCCTGTGGAACACCTACATCTGTATTAACGAAGCGCTAAC  
CGTTTTTATCAGGCTCTGGGAGGCAGAATAAATGATCATATCGTCAATTATTACC  
TCCACGGGGAGAGCCTGAGCAAACCTGGCCTCAGGCATTTGAGAAGCACACGGT  
CACACTGCTTCCGGTAGTCAATAAACCGGTAAACCAGCAATAGACATAAGCGGC  
TATTTAACGACCCTGCCCTGAACCGACGACCGGGTTCGAATTTGCTTTCGAATTT  
CTGCCATTTCATCCGCTTATTATCACTTATTCAGGCGTAGCACCAGGCGTTTAAGG  
GCACCAATAACTGCCTTAAAAAATTACGCCCCGCCCTGCCACTCATCGCAGTA  
CTGTTGTAATTCATTAAGCATTCTGCCGACATGGAAGCCATCACAGACGGCATG  
ATGAACCTGAATCGCCAGCGGCATCAGCACCTTGTGCGCCTTGGGTATAATTTT  
GCCCATGGTGAAAACGGGGGCGAAGAAGTTGCCATATTGGCCACGTTTAAATC  
AAAACCTGGTGAAACTCACCCAGGGATTGGCTGAGACGAAAACATATTCTCAAT  
AAACCCTTTAGGGAAATAGGCCAGGTTTTCCCGTAACACGCCACATCTTGCGA  
ATATATGTGTAGAACTGCCGGAAATCGTCGTGGTATTCACTCCAGAGCGATGA  
AAACGTTTTAGTTTTGCTCATGGAAAACGGTGTAACAAGGGTGAACACTATCCCA  
TATCACCAGCTCACCGTCTTTCATTGCCATACG

pRC2308

GAATTCGGATGAGCATTTCATCAGGCGGGCAAGAATGTGAATAAAGGCCGGAT  
AAAACCTTGTGCTTATTTTTCTTACGGTCTTTAAAAGGCCGTAATATCCAGCTGA  
ACGGTCTGGTTATAGGTACATTGAGCAACTGACTGAAATGCCTCAAATGTTCTT  
TACGATGCCATTGGGATATATCAACGGTGGTATATCCAGTGATTTTTTTCTCCAT  
TTTAGCTTCCTTAGCTCCTGAAAATCTCGATAACTCAAAAATACGCCCGGTAGT  
GATCTTATTTTATTATGGTGAAAGTTGGAACCTCTTACGTGCCGATCAACGTCTC  
ATTTTCGCCAAAAGTTGGCCAGGGCTTCCCGGTATCAACAGGGACACCAGGAT  
TTATTTATTCTGCGAAGTGATCTTCCGTCACAGGTATTTATTCGGCGCAAAGTGC  
GTCCGGGTGATGCTGCCAACTTACTGATTTAGTGTATGATGGTGTTTTTGAGGTG  
CTCCAGTGGCTTCTGTTTCTATCAGCTGTCCCTCCTGTTTCAGCTACTGACGGGG  
TGGTGCGTAACGGCAAAGCACCGCCGGACATCAGCGCTAGCGGAGTGTATAC  
TGGCTTACTATGTTGGCACTGATGAGGGTGTGAGTGAAGTGCTTCATGTGGCAG  
GAGAAAAAAGGCTGCACCGGTGCGTCAGCAGAATATGTGATACAGGATATATTC  
CGCTTCTCGCTCACTGACTCGCTACGCTCGGTGCTTCGACTGCGGCGAGCGG  
AAATGGCTTACGAACGGGGCGGAGATTTCTGGAAGATGCCAGGAAGATACTTA  
ACAGGGAAGTGAGAGGGCCGCGGCAAAGCCGTTTTTCCATAGGCTCCGCCCCC  
CTGACAAGCATCACGAAATCTGACGCTCAAATCAGTGGTGGCGAAACCCGACA  
GGACTATAAAGATACCAGGCGTTTTCCCCTGGCGGCTCCCTCGTGCGCTCTCCT

G TTCCTGCCTTTTCGGTTTACCGGTGTCATTCCGCTGTTATGGCCGCGTTTGTCT  
CATTCCACGCCTGACACTCAGTTCCGGGTAGGCAGTTCGCTCCAAGCTGGACT  
GTATGCACGAACCCCGTTCAGTCCGACCGCTGCGCCTTATCCGGTAACTATC  
GTCTTGAGTCCAACCCGGAAAGACATGCAAAAGCACCACTGGCAGCAGCCACT  
GGTAATTGATTTAGAGGAGTTAGTCTTGAAGTCATGCGCCGGTTAAGGCTAAAC  
TGAAAGGACAAGTTTTGGTGACTGCGCTCCTCCAAGCCAGTTACCTCGGTTCAA  
AGAGTTGGTAGCTCAGAGAACCCTTCGAAAAACCGCCCTGCAAGGCGGTTTTTTC  
GTTTTCAGAGCAAGAGATTACGCGCAGACCAAACGATCTCAAGAAGATCATCT  
TATTAATCAGATAAAATATTTCTAGATTTTCAAGTGCATTTTATCTCTTCAAATGTAG  
CACCTGAAGTCAGCCCCATACGATATAAGTTGTAATTCTCATGTTTGACAGCTTA  
TCATCGATAAGCTTTAATGCGGTAGTTTATCACAGTTAAATTGCTAACGCAGTCA  
GGCACCGTGTATGAAATCTAACAATGCGCTCATCGTCATCCTCGGCACCGTCAC  
CCTGGATGCTGTAGGCATAGGCTTGGTTATGCCGGTACTGCCGGGCTCTTGC  
GGGATTACGAAATCATCCTGTGGAGCTTAGTAGGTTTAGCAAGATGGCAGCGCC  
TAAATGTAGAATGATAAAAGGATTAAGAGATTAATTTCCCTAAAATGATAAAACA  
AGCGTTTTGAAAGCGCTTGTTTTTTGGTTTGCAGTCAGAGTAGAATAGAAGTAT  
CAAAAAAGCACCGACTCGGTGCCACTTTTTCAAGTTGATAACGGACTAGCCTT  
ATTTAACTTGCTATGCTGTTTTGAATGGTTCCAACAAGATTATTTTATAACTTTTA  
TAACAATAATCAAGGAGAAATTCAAAGAAATTTATCAGCCATAAAACAATACTTA  
ATACTATAGAATGATAACAAAATAAACTACTTTTTAAAAGAATTTTGTGTTATAATC  
TATTTATTATTAAGTATTGGGTAATATTTTTTGAAGAGCGGCCGCTTAATAACAG  
GGGACGTGGTAATCCGTCCCCTTTTTATTTCTGACTGAGTTAATAACAGGCCTG  
CTTCGGCAGGCCTTTTTATTTCTGACTGAGTTCTTCTCAGGCCTGCTGGTAATCG  
CAGGCCTTTTTATTTCTAGTCTGACTGACTGACTGACTGACTGACTGACTGACTGA  
GACTGACTGACTGACTGACTGACTGACTGACTGACTGACTGACTGACTGACTGACTGA  
CTGACTGACTGACTGACTGACTGACTGACTGACTGACTGACTGACTGACTGACTGACT  
GACTGACTGACTGACTGACTGACTGACTGACTgactgaCTGACCTCGAGATGGATAAGAA  
ATACTCAATAGGCTTAGCTATCGGCACAAATAGCGTCGGATGGGCGGTGATCAC  
TGATGAATATAAGGTTCCGTCTAAAAGTTCAAGGTTCTGGGAAATACAGACCG  
CCACAGTATCAAAAAAATCTTATAGGGGCTCTTTATTTGACAGTGGAGAGACA  
GCGGAAGCGACTCGTCTCAAACGGACAGCTCGTAGAAGGTATACACGTCCGAA  
GAATCGTATTTGTTATCTACAGGAGATTTTTTCAAATGAGATGGCGAAAGTAGAT  
GATAGTTTCTTTCATCGACTTGAAGAGTCTTTTTTGGTGGAAAGAAGACAAGAAGC  
ATGAACGTCATCCTATTTTTGGAAATATAGTAGATGAAGTTGCTTATCATGAGAA  
ATATCCAATCTATCATCTGCGAAAAAATTGGTAGATTCTACTGATAAAGCG  
GATTTGCGCTTAATCTATTTGGCCTTAGCGCATATGATTAAGTTTCGTGGTCATT  
TTTTGATTGAGGGAGATTTAAATCCTGATAATAGTGATGTGGACAACTATTTAT  
CCAGTTGGTACAAACCTACAATCAATTATTTGAAGAAAACCCTATTAACGCAAGT  
GGAGTAGATGCTAAAGCGATTCTTTCTGCACGATTGAGTAAATCAAGACGATTA  
GAAAATCTCATTGCTCAGCTCCCCGGTGAGAAGAAAAATGGCTTATTTGGGAAT  
CTCATTGCTTTGTCATTGGGTTTACCCTAATTTTTAAATCAAATTTTGATTTGGC  
AGAAGATGCTAAATTACAGCTTTCAAAAGATACTTACGATGATGATTTAGATAATT  
TATTGGCGCAAATTGGAGATCAATATGCTGATTTGTTTTTGGCAGCTAAGAATTT  
ATCAGATGCTATTTTACTTTTACAGATATCCTAAGAGTAAATACTGAAATAACTAAGG

CTCCCCTATCAGCTTCAATGATTAACGCTACGATGAACATCATCAAGACTTGAC  
TCTTTTAAAAGCTTTAGTTTCGACAACAACCTTCCAGAAAAGTATAAAGAAATCTTTT  
TTGATCAATCAAAAAACGGATATGCAGGTTATATTGATGGGGGAGCTAGCCAAG  
AAGAATTTTATAAATTTATCAAACCAATTTTAGAAAAAATGGATGGTACTGAGGAA  
TTATTGGTGAAACTAAATCGTGAAGATTTGCTGCGCAAGCAACGGACCTTTGAC  
AACGGCTCTATTCCCATCAAATTCACCTGGGTGAGCTGCATGCTATTTTGAGAA  
GACAAGAAGACTTTTATCCATTTTTAAAAGACAATCGTGAGAAGATTGAAAAAAT  
CTTGACTTTTTCGAATTCCTTATTATGTTGGTCCATTGGCGCGTGGCAATAGTCGT  
TTTGCATGGATGACTCGGAAGTCTGAAGAAACAATTACCCCATGGAATTTTGAAG  
AAGTTGTCGATAAAGGTGCTTCAGCTCAATCATTTATTGAACGCATGACAACTT  
TGATAAAAATCTTCAAATGAAAAAGTACTACCAAACATAGTTTGCTTTATGAGT  
ATTTTACGGTTTATAACGAATTGACAAAGGTCAAATATGTTACTGAAGGAATGCG  
AAAACCAGCATTTCTTTTCAGGTGAACAGAAGAAAGCCATTGTTGATTTACTCTTC  
AAAACAAATCGAAAAGTAACCGTTAAGCAATTAAGAAGATTATTTCAAAAAAAT  
AGAATGTTTTGATAGTGTGAAATTTTCAGGAGTTGAAGATAGATTTAATGCTTCAT  
TAGGTACCTACCATGATTTGCTAAAAATTATTAAGATAAAGATTTTTTGGATAAT  
GAAGAAAATGAAGATATCTTAGAGGATATTGTTTTAACATTGACCTTATTTGAAGA  
TAGGGAGATGATTGAGGAAAGACTTAAAACATATGCTCACCTCTTTGATGATAAG  
GTGATGAAACAGCTTAAACGTCGCCGTTATACTGGTTGGGGACGTTTGTCTCGA  
AAATTGATTAATGGTATTAGGGATAAGCAATCTGGCAAACAATATTAGATTTTTT  
GAAATCAGATGGTTTTGCCAATCGCAATTTTATGCAGCTGATCCATGATGATAGT  
TTGACATTTAAGAAGACATTCAAAAAGCACAAGTGTCTGGACAAGGCGATAGTT  
TACATGAACATATTGCAAATTTAGCTGGTAGCCCTGCTATTA AAAAAGGTATTTTA  
CAGACTGTAAAAGTTGTTGATGAATTGGTCAAAGTAATGGGGCGGCATAAGCCA  
GAAAATATCGTTATTGAAATGGCACGTGAAAATCAGACAACCTCAAAGGGCCAG  
AAAAATTCGCGAGAGCGTATGAAACGAATCGAAGAAGGTATCAAAGAATTAGGA  
AGTCAGATTCTTAAAGAGCATCCTGTTGAAAATACTCAATTGCAAATGAAAAGC  
TCTATCTCTATTATCTCCAAAATGGAAGAGACATGTATGTGGACCAAGAATTAGA  
TATTAATCGTTTAAAGTGATTATGATGTCGATGCCATTGTTCCACAAAGTTTCCTTA  
AAGACGATTCAATAGACAATAAGGTCTTAACGCGTTCTGATAAAAATCGTGGTAA  
ATCGGATAACGTTCCAAGTGAAGAAGTAGTCAAAAAGATGAAAAACTATTGGAG  
ACAACCTTCTAAACGCCAAGTTAATCACTCAACGTAAGTTTGATAATTTAACGAAA  
GCTGAACGTGGAGGTTTGAGTGAACCTTGATAAAGCTGGTTTTATCAAACGCCAA  
TTGGTTGAAACTCGCCAAATCACTAAGCATGTGGCACAAATTTTGGATAGTCGCA  
TGAATACTAAATACGATGAAAATGATAAACTTATTTCGAGAGGTTAAAGTGATTAC  
CTTAAAATCTAAATTAGTTTCTGACTTCCGAAAAGATTTCCAATTCTATAAAGTAC  
GTGAGATTAACAATTACCATCATGCCATGATGCGTATCTAAATGCCGTCGTTGG  
AACTGCTTTGATTAAGAAATATCCAAAACCTTGAATCGGAGTTTGTCTATGGTGAT  
TATAAAGTTTATGATGTTTCGTAAAATGATTGCTAAGTCTGAGCAAGAAATAGGCA  
AAGCAACCGCAAATATTTCTTTTACTCTAATATCATGAACTTCTTCAAACAGAA  
ATTACACTTGCAAATGGAGAGATTTCGCAAACGCCCTCTAATCGAACTAATGGG  
GAAACTGGAGAAATTGTCTGGGATAAAGGGCGAGATTTTGCCACAGTGCGCAA  
GTATTGTCCATGCCCAAGTCAATATTGTCAAGAAAACAGAAGTACAGACAGGC  
GGATTCTCAAGGAGTCAATTTTACCAA AAAAGAAATTCGGACAAGCTTATTGCTC

GTAAAAAAGACTGGGATCCAAAAAATATGGTGGTTTTGATAGTCCAACGGTAG  
CTTATTCAGTCCTAGTGGTTGCTAAGGTGGAAAAAGGAAATCGAAGAAGTTAA  
AATCCGTTAAAGAGTTACTAGGGATCACAAATTATGGAAAGAAGTTCCTTTAAAA  
AAATCCGATTGACTTTTTTAGAAGCTAAAGGATATAAGGAAGTTAAAAAAGACTTA  
ATCATTAAACTACCTAAATATAGTCTTTTTGAGTTAGAAAACGGTCGTAAACGGA  
TGCTGGCTAGTGCCGGAGAATTACAAAAAGGAAATGAGCTGGCTCTGCCAAGC  
AAATATGTGAATTTTTTATATTTAGCTAGTCATTATGAAAAGTTGAAGGGTAGTCC  
AGAAGATAACGAACAAAAACAATTGTTTGTGGAGCAGCATAAGCATTATTTAGAT  
GAGATTATTGAGCAAATCAGTGAATTTTCTAAGCGTGTTATTTTAGCAGATGCCA  
ATTTAGATAAAGTTCTTAGTGCATATAACAAACATAGAGACAAACCAATACGTGA  
ACAAGCAGAAAATATTATTCATTTATTTACGTTGACGAATCTTGGAGCTCCCGCT  
GCTTTTAAATATTTTGATACAACAATTGATCGTAAACGATATACGTCTACAAAAGA  
AGTTTTAGATGCCACTCTTATCCATCAATCCATCACTGGTCTTTATGAAACACGC  
ATTGATTTGAGTCAGCTAGGAGGTCCTAGGGGAGGTGGCTCAGAAGGTGGCGG  
ATCTGAAGGTGGCTCTGGAActagtATGAGCGATAAAATTATTCACCTGACTGACG  
ACAGTTTTGACACGGATGTA CTCAAAGCGGACGGGGCGATCCTCGTCGATTTCT  
GGGCAGAGTGGTGCGGTCCGTGCAAATGATCGCCCCGATTCTGGATGAAATC  
GCTGACGAATATCAGGGCAAATGACCGTTGCAAACACTGAACATCGATCAAAC  
CCTGGCACTGCGCCGAAATATGGCATCCGTGGTATCCCGACTCTGCTGCTGTTC  
AAAACGGTGAAGTGGCGGCAACCAAAGTGGGTGCACTGTCTAAAGGTCAGTT  
GAAAGAGTTCCTCGACGCTAACCTGGCCGGTTCTGGTTCTGGCCATATGCACCA  
TCATCATCATCATTCTTCTGGTCTGGTGCCACGCGGTTCTGGTATGAAAGAAAC  
CGCTGCTGCTAAATTCGAACGCCAGCACATGGACAGCCCAGATCTGGGTACCG  
ACGACGACGACAAGGCCATGGCTGATATCggatccCATATGGAAATGATGCTCGAT  
AAGAAACAGATTCGTGCGATCTTTCTCTTTGAGTTTTAAATGGGTGCGCAAAGCG  
GCGGAGACGACGCGTAATATTAACAACGCGTTCGGTCCCTGGCACCGCGAACGA  
GCGTACCGTGCAATGGTGGTTCAAAAAGTTTCGCAAAGGCGACGAATCTCTGGA  
GGACGAAGAGCGTTCTGGCCGCCCGTCCGAGGTTGACAACGACCAGCTGCGTG  
CAATCATCGAAGCTGATCCGCTGACTACCACCCGCGAAGTTGCTGAAGA ACTGA  
ATGTGGATCACTCTACTGTGGTTCGCCACCTGAAACAGATCGGTAAAGTAAAA  
AACTGGACAAATGGGTTCCCTCATGAACTGTCTGAAAACCAGAAAAACCGTCGTT  
TCGAAGTTAGCTCCTCTCTGATTCTGCGTAACAACAACGAACCGTTCCTGGATC  
GTATCGTAACCTGTGATGAGAAATGGATTCTGTATGATAACCGTCGCCGCTCTG  
CTCAGTGGCTGGATCGCGAAGAAGCTCCAAAACACTTCCCGAAACCGAATCTGC  
ACCAGAAGAAAGTCATGGTAACCGTATGGTGGTCTGCCGCAGGTGTTATCCACT  
ATTCCTTCCTGAACCCGGGCGAACTATCACCAGCGAAAAATACTGCCAGCAGA  
TTGACGAAATGCACCGTAACTGCAGCGTCTGCAGCCAGCACTGGTGAATCGTA  
AAGGTCCGATCCTGCTGCATGATAACGCCCGTCCGCACGTTGCCCAACCGACC  
CTGCAGAACTGAACGA ACTGGGCTATGAAGTTCTGCCACACCCGCCGTA CTCC  
CCGGATCTGTCCCCGACTGACTACCATTTCTTCAAGCATCTGGACA ACTTCTG  
CAGGGTAAACGTTTTTACAACCAACAGGACGCAGAAAACGCTTTCCAGGAGTTC  
GTCAAAGCCGTTCCACTGACTTCTACGCGACCGGTATCAACAAGCTGATCAGC  
CGTTGGCAGAAATGCGTGGACTGTAACGGCAGCTACTTCGATTAAGACGTCTTA  
ATAACTAAAAATATGGTATAATACTCTTAATAAATGCAGTAATACAGGGGCTTTTC

AAGACTGAAGTCTAGCTGAGACAAATAGTGCGATTACGAAATTTTTAGACAAAA  
ATAGTCTACGAGGTTTTAGAGCTATGCTGTTTTGAATGGTCCCAAACGGTTTTTC  
CCAGTCACGACGTTGTAAAACGAGTTTTAGAGCTATGCTGTTTTGAATGGTCCCA  
AACTTCAGCACACTGAGACTTGTTGAGTTCATGTTTTAGAGCTATGCTGTTTT  
GAATGGACTCCATTCAACATTGCCGATGATAACTTGAGAAAGAGGGTTAATACC  
AGCAGTCGGATACCTTCCTATTCTTTCTGTTAAAGCGTTTTTCATGTTATAATAGG  
CAAAGAAGAGTAGTGTGATCGTCCATTCCGACAGCATCGCCAGTCACTATGGC  
GTGCTGCTAGCGCTATATGCGTTGATGCAATTTCTATGCGCACCCGTTCTCGGA  
GCACTGTCCGACCGCTTTGGCCGCCGCCAGTCCTGCTCGCTTCGCTACTTGG  
AGCCACTATCGACTACGCGATCATGGCGACCACACCCGTCCTGTGGATCCTCTA  
CGCCGGACGCATCGTGGCCGGCATCACCGGCCACAGGTGCGGTTGCTGGC  
GCCTATATCGCCGACATCACCGATGGGGAAGATCGGGCTCGCCACTTCGGGGCT  
CATGAGCGCTTGTTCGGCGTGGGTATGGTGGCAGGCCCGTGGCCGGGGGA  
CTGTTGGGCGCCATCTCCTTGATGCACCATTCTTGCGGCGGCGGTGCTCAA  
CGGCCTCAACCTACTACTGGGCTGCTTCTAATGCAGGAGTCGCATAAGGGAG  
AGCGTCGACCGATGCCCTTGAGAGCCTTCAACCCAGTCAGCTCCTTCCGGTGG  
GCGCGGGGCATGACTATCGTCCGCGACTTATGACTGTCTTCTTATCATGCAA  
CTCGTAGGACAGGTGCCGGCAGCGCTCTGGGTCATTTTCGGCGAGGACCGCTT  
TCGCTGGAGCGCGACGATGATCGGCCTGTCGCTTGCGGTATTCGGAATCTTGC  
ACGCCCTCGCTCAAGCCTTCGTCACTGGTCCCGCCACCAAACGTTTTCGGCGAG  
AAGCAGGCCATTATCGCCGGCATGGCGGGCCGACGCGCTGGGCTACGTCTTGT  
GGCGTTTCGCGACGCGAGGCTGGATGGCCTTCCCATTATGATTCTTCTCGCTTC  
CGGCGGCATCGGGATGCCCGCGTTGCAGGCCATGCTGTCCAGGCAGGTAGAT  
GACGACCATCAGGGACAGCTTCAAGGATCGCTCGCGGCTTTACCAGCCTAAC  
TTCGATCATTGGACCGCTGATCGTCACGGCGATTTATGCCGCCTCGGCGAGCA  
CATGGAACGGGTTGGCATGGATTGTAGGCGCCGCCCTATACCTTGTCTGCCTC  
CCGCGTTGCGTTCGCGGTGCATGGAGCCGGGCCACCTCGACCTGAATGGAAG  
CCGGCGGCACCTCGCTAACGGATTCACCACTCCAAGAATTGGAGCCAATCAATT  
CTTGCGGAGAACTGTGAATGCGCAAACCAACCCTTGGCAGAACATATCCATCGC  
GTCCGCCATCTCCAGCAGCCGCACGCGGGCGCATCTCGGGCAGCGTTGGGTCT  
GGCCACGGGTGCGCATGATCGTCTCTGTGCTTGGAGACCCGGCTAGGCTGG  
CGGGGTTGCCCTTACTGGTTAGCAGAATGAATCACCGATACGCGAGCGAACGTG  
AAGCGACTGCTGCTGCAAACGTCTGCGACCTGAGCAACAACATGAATGGTCTT  
CGGTTTCCGTGTTTCGTAAAGTCTGGAAACGCGGAAGTCCCCTACGTGCTGCTG  
AAGTTGCCCGCAACAGAGAGTGGAAACCAACCGGTGATACCACGATACTATGACT  
GAGAGTCAACGCCATGAGCGGCCTCATTTCTTATTCTGAGTTACAACAGTCCGC  
ACCGCTGTCCGGTAGCTCCTTCCGGTGGGCGCGGGGCATGACTATCGTCCGCC  
CACTTATGACTGTCTTCTTATCATGCAACTCGTAGGACAGGTGCCGGCAGCGC  
CCAACAGTCCCCCGGCCACGGGGCCTGCCACCATACCACGCCGAAACAAGC  
GCCCTGCACCATTATGTTCCGGATCTGCATCGCAGGATGCTGCTGGCTACCCTG  
TGGAACACCTACATCTGTATTAACGAAGCGCTAACCGTTTTTATCAGGCTCTGG  
GAGGCAGAATAAATGATCATATCGTCAATTATTACCTCCACGGGGAGAGCCTGA  
GCAAACCTGGCCTCAGGCATTTGAGAAGCACACGGTCACACTGCTTCCGGTAGTC  
ATAAACCGGTAAACCAGCAATAGACATAAGCGGCTATTTAACGACCCTGCCCT



GAACCGACGACCGGGTCGAATTTGCTTTGCAATTTCTGCCATTCATCCGCTTATT  
ATCACTTATTCAGGCGTAGCACCAGGCGTTTAAGGGCACCAATAACTGCCTTAA  
AAAAATTACGCCCCGCCCTGCCACTCATCGCAGTACTGTTGTAATTCATTAAGCA  
TTCTGCCGACATGGAAGCCATCACAGACGGCATGATGAACCTGAATCGCCAGC  
GGCATCAGCACCTTGTGCGCTTGGCGTATAATATTTGCCCATGGTGAAAACGGGG  
GCGAAGAAGTTGTCCATATTGGCCACGTTTAAATCAAACCTGGTGAAACTCACC  
CAGGGATTGGCTGAGACGAAAAACATATTCTCAATAAACCCCTTTAGGGAAATAG  
GCCAGGTTTTTCACCGTAACACGCCACATCTTGCGAATATATGTGTAGAACTGC  
CGGAAATCGTCGTGGTATTCACTCCAGAGCGATGAAAACGTTTCAGTTTGCTCA  
TGGAACCGGTGTAACAAGGGTGAACACTATCCCATATCACCAGCTCACCGTCT  
TTCATTGCCATACG

pRC2309

GAATTCCGGATGAGCATTTCATCAGGCGGGCAAGAATGTGAATAAAGGCCGGAT  
AAACTTGTGCTTATTTTTCTTTACGGTCTTTAAAAGGCCGTAATATCCAGCTGA  
ACGGTCTGGTTATAGGTACATTGAGCAACTGACTGAAATGCCTCAAATGTTCTT  
TACGATGCCATTGGGATATATCAACGGTGGTATATCCAGTGATTTTTTTCTCCAT  
TTTAGCTTCCTTAGCTCCTGAAAATCTCGATAACTCAAAAATACGCCCGGTAGT  
GATCTTATTTTATTATGGTGAAAGTTGGAACCTCTTACGTGCCGATCAACGTCTC  
ATTTTCGCCAAAAGTTGGCCCAGGGCTTCCCGGTATCAACAGGGACACCAGGAT  
TTATTTATTCTGCGAAGTGATCTTCCGTACAGGTATTTATTTCGGCGCAAAGTGC  
GTCGGGTGATGCTGCCAACTTACTGATTTAGTGTATGATGGTGTTTTTGAGGTG  
CTCCAGTGGCTTCTGTTTCTATCAGCTGTCCCTCCTGTTTCAGCTACTGACGGGG  
TGGTGCGTAACGGCAAAGCACCGCCGGACATCAGCGCTAGCGGAGTGTATAC  
TGGCTTACTATGTTGGCACTGATGAGGGTGTGAGTGAAGTGCTTCATGTGGCAG  
GAGAAAAAAGGCTGCACCGGTGCGTCAGCAGAATATGTGATACAGGATATATTC  
CGCTTCCTCGCTCACTGACTCGCTACGCTCGGTGCTTCGACTGCGGCGAGCGG  
AAATGGCTTACGAACGGGGCGGAGATTTCTGGAAGATGCCAGGAAGATACTTA  
ACAGGGAAGTGAGAGGGCCGCGGCAAAGCCGTTTTTTCCATAGGCTCCGCCCC  
CTGACAAGCATCACGAAATCTGACGCTCAAATCAGTGGTGGCGAAACCCGACA  
GGACTATAAAGATACCAGGCGTTTCCCCTGGCGGCTCCCTCGTGCGCTCTCCT  
GTTCTGCTTTTCGGTTTACCGGTGTCATTCCGCTGTTATGGCCGCGTTTGTCT  
CATTCCACGCCTGACACTCAGTTCCGGGTAGGCAGTTCGCTCCAAGCTGGACT  
GTATGCACGAACCCCCGTTTCAGTCCGACCGCTGCGCCTTATCCGGTAACTATC  
GTCTTGAGTCCAACCCGGAAGACATGCAAAGCACCACTGGCAGCAGCCACT  
GGTAATTGATTTAGAGGAGTTAGTCTTGAAGTCATGCGCCGGTTAAGGCTAAAC  
TGAAAGGACAAGTTTTGGTGACTGCGCTCCTCCAAGCCAGTTACCTCGGTTCAA  
AGAGTTGGTAGCTCAGAGAACCTTCGAAAACCGCCCTGCAAGGCGGTTTTTTTC  
GTTTTTCAGAGCAAGAGATTACGCGCAGACCAAACGATCTCAAGAAGATCATCT  
TATTAATCAGATAAAATATTTCTAGATTTTCAGTGCAATTTATCTCTTCAAATGTAG  
CACCTGAAGTCAGCCCCATACGATATAAGTTGTAATTCTCATGTTTGACAGCTTA  
TCATCGATAAGCTTTAATGCGGTAGTTTATCACAGTTAAATTGCTAACGCAGTCA  
GGCACCGTGTATGAAATCTAACAATGCGCTCATCGTCATCCTCGGCACCGTCAC

CCTGGATGCTGTAGGCATAGGCTTGGTTATGCCGGTACTGCCGGGCCTCTTGC  
GGGATTACGAAATCATCCTGTGGAGCTTAGTAGGTTTAGCAAGATGGCAGCGCC  
TAAATGTAGAATGATAAAAGGATTAAGAGATTAATTTCCCTAAAATGATAAAACA  
AGCGTTTTGAAAGCGCTTGTTTTTTTGGTTTGCAGTCAGAGTAGAATAGAAGTAT  
CAAAAAAGCACCGACTCGGTGCCACTTTTTCAAGTTGATAACGGACTAGCCTT  
ATTTAACTTGCTATGCTGTTTTGAATGGTTCCAACAAGATTATTTATAACTTTTA  
TAACAATAATCAAGGAGAAATTCAAAGAAATTTATCAGCCATAAAACAATACTTA  
ATACTATAGAATGATAACAAAATAAACTACTTTTTAAAAGAATTTTGTGTTATAATC  
TATTTATTATTAAGTATTGGGTAATATTTTTGAAGAGCggccgctaatacactcactatag  
ggagaggatccgcggaattgCAGCTGGTTAATAACAGGGGACGTGGTAATCCGTCCCCT  
TTTTATTTCTGACTGAGTTAATAACAGGCCTGCTTCGGCAGGCCTTTTTATTTCT  
GACTGAGTTCTTCTCAGGCCTGCTGGTAATCGCAGGCCTTTTTATTTCTAGACA  
ATTCCGACGTCTAAGGAAACCATTATCATGACATCAACCTATAAAAATAGGCGTA  
TCACGAGGCCCTCTCGTCTCCACCTCAAGCTCCCTATCTAGTGATAGCGATTGA  
CATCCCTATCAGTGACGGAGATATTGAGCACATCAGCAGGACGCACTGACCCT  
TTAAGaggaggCTCGAGATGGATAAGAAATACTCAATAGGCTTAGCTATCGGCACA  
AATAGCGTCCGATGGGCGGTGATCACTGATGAATATAAGGTTCCGTCTAAAAG  
TTCAAGGTTCTGGGAAATACAGACCGCCACAGTATCAAAAAAATCTTATAGGG  
GCTCTTTTTATTTGACAGTGGAGAGACAGCGGAAGCGACTCGTCTCAAACGGACA  
GCTCGTAGAAGGTATACACGTCGGAAGAATCGTATTTGTTATCTACAGGAGATTT  
TTTCAAATGAGATGGCGAAAGTAGATGATAGTTTCTTTTCATCGACTTGAAGAGTC  
TTTTTTGGTGAAGAAGACAAGAAGCATGAACGTCATCCTATTTTTGGAAATATA  
GTAGATGAAGTTGCTTATCATGAGAAATATCCAATCTATCATCTGCGAAAAA  
AATTGGTAGATTCTACTGATAAAGCGGATTTGCGCTTAATCTATTTGGCCTTAGC  
GCATATGATTAAGTTTCGTGGTCATTTTTTTGATTGAGGGAGATTTAAATCCTGAT  
AATAGTGATGTGGACAACTATTTATCCAGTTGGTACAAACCTACAATCAATTATT  
TGAAGAAAACCTATTAACGCAAGTGGAGTAGATGCTAAAGCGATTCTTTCTGCA  
CGATTGAGTAAATCAAGACGATTAGAAAATCTCATTGCTCAGCTCCCCGGTGAG  
AAGAAAAATGGCTTATTTGGGAATCTCATTGCTTTGTCATTGGGTTTGACCCCTA  
ATTTAAATCAAATTTTGATTTGGCAGAAGATGCTAAATTACAGCTTTCAAAGAT  
ACTTACGATGATGATTTAGATAATTTATTGGCGCAAATTGGAGATCAATATGCTG  
ATTTGTTTTTTGGCAGCTAAGAATTTATCAGATGCTATTTTACTTTTACAGATATCCTA  
AGAGTAAATACTGAAATAACTAAGGCTCCCCTATCAGCTTCAATGATTAACGCT  
ACGATGAACATCATCAAGACTTACTCTTTTAAAAGCTTTAGTTTCGACAACA  
TCCAGAAAAGTATAAAGAAATCTTTTTTATCAATCAAAAAACGGATATGCAGGT  
TATATTGATGGGGGAGCTAGCCAAGAAGAATTTTATAAATTTATCAAACCAATTTT  
AGAAAAAATGGATGGTACTGAGGAATTATTGGTGAAACTAAATCGTGAAGATTTG  
CTGCGCAAGCAACGGACCTTTGACAACGGCTCTATTCCCCTCAAATTCACCTTG  
GGTGAGCTGCATGCTATTTTGAAGAAGACAAGAAGACTTTTATCCATTTTTAAAAG  
ACAATCGTGAGAAGATTGAAAAAATCTTGACTTTTCGAATTCCTTATTATGTTGGT  
CCATTGGCGCGTGGCAATAGTCGTTTTGCATGGATGACTCGGAAGTCTGAAGAA  
ACAATTACCCCATGGAATTTTGAAGAAGTTGTCGATAAAGGTGCTTCAGCTCAAT  
CATTTATTGAACGCATGACAACTTTGATAAAAATCTTCAAATGAAAAAGTACTA  
CCAAAACATAGTTTGCTTTATGAGTATTTTACGGTTTATAACGAATTGACAAAGGT

CAAATATGTTACTGAAGGAATGCGAAAACCAGCATTCTTTCTTTGAGGTGAACAGAA  
GAAAGCCATTGTTGATTTACTCTTCAAAAACAAATCGAAAAGTAACCGTTAAGCAA  
TAAAAGAAGATTATTTCAAAAAAATAGAATGTTTTGATAGTGTTGAAATTTTCAGG  
AGTTGAAGATAGATTTAATGCTTCATTAGGTACCTACCATGATTTGCTAAAAATTA  
TAAAGATAAAGATTTTTTTGGATAATGAAGAAAATGAAGATATCTTAGAGGATATT  
GTTTTAACATTGACCTTATTTGAAGATAGGGAGATGATTGAGGAAAGACTTAAAA  
CATATGCTCACCTCTTTGATGATAAGGTGATGAAACAGCTTAAACGTGCGCGTTA  
TACTGGTTGGGGACGTTTGTCTCGAAAATTGATTAATGGTATTAGGGATAAGCAA  
TCTGGCAAACAATATTAGATTTTTTGAATCAGATGGTTTTGCCAATCGCAATTT  
TATGCAGCTGATCCATGATGATAGTTTGACATTTAAGAAGACATTCAAAAAGCA  
CAAGTGTCTGGACAAGGCGATAGTTTACATGAACATATTGCAAATTTAGCTGGTA  
GCCCTGCTATTA AAAAAGGTATTTTACAGACTGTAAAAGTTGTTGATGAATTGGT  
CAAAGTAATGGGGCGGCATAAGCCAGAAAATATCGTTATTGAAATGGCACGTGA  
AAATCAGACAACCTCAAAGGGCCAGAAAATTCGCGAGAGCGTATGAAACGAAT  
CGAAGAAGGTATCAAAGAATTAGGAAGTCAGATTCTTAAGAGCATCCTGTTGA  
AAATACTCAATTGCAAATGAAAAGCTCTATCTCTATTATCTCCAAAATGGAAGA  
GACATGTATGTGGACCAAGAATTAGATATTAATCGTTTAAGTGATTATGATGTCG  
ATGCCATTGTTCCACAAAGTTTCCTTAAGACGATTCAATAGACAATAAGGTCTT  
AACGCGTTCTGATAAAAATCGTGGTAAATCGGATAACGTTCCAAGTGAAGAAGT  
AGTCAAAAAGATGAAAACCTATTGGAGACAACCTCTAAACGCCAAGTTAATCACT  
CAACGTAAGTTTGATAATTTAACGAAAGCTGAACGTGGAGGTTTGAGTGAACCTTG  
ATAAAGCTGGTTTTATCAAACGCCAATTGGTTGAAACTCGCCAATCACTAAGCA  
TGTGGCACAATTTTGGATAGTCGCATGAATACTAAATACGATGAAAATGATAAA  
CTTATTCGAGAGGTTAAAGTGATTACCTTAAATCTAAATTAGTTTCTGACTTCCG  
AAAAGATTTCCAATTCTATAAAGTACGTGAGATTAACAATTACCATCATGCCCAT  
GATGCGTATCTAAATGCCGTCGTTGGAACCTGCTTTGATTAAGAAATATCCAAAAC  
TTGAATCGGAGTTTGTCTATGGTGATTATAAAGTTTATGATGTTTCGTAAAATGATT  
GCTAAGTCTGAGCAAGAAATAGGCAAAGCAACCGCAAATATTTCTTTTACTCTA  
ATATCATGAACTTCTTCAAACAGAAATTACACTTGCAAATGGAGAGATTGCGAA  
ACGCCCTCTAATCGAAACTAATGGGGAAACTGGAGAAATTGTCTGGGATAAAGG  
GCGAGATTTTGCCACAGTGCGCAAAGTATTGTCCATGCCCAAGTCAATATTGT  
CAAGAAAACAGAAGTACAGACAGGCGGATTCTCCAAGGAGTCAATTTTACCAA  
AAGAAATTCGGACAAGCTTATTGCTCGTAAAAAAGACTGGGATCCAAAAAATAT  
GGTGGTTTTGATAGTCCAACGGTAGCTTATTAGTCCTAGTGGTTGCTAAGGTG  
GAAAAGGGAAATCGAAGAAGTTAAAATCCGTTAAAGAGTTACTAGGGATCACA  
ATTATGGAAAGAAGTTCCTTTGAAAAAATCCGATTGACTTTTTAGAAAGCTAAAG  
GATATAAGGAAGTTAAAAAAGACTTAATCATTAAACTACCTAAATATAGTCTTTTT  
GAGTTAGAAAACGGTTCGTAAACGGATGCTGGCTAGTGCCGGAGAATTACAAAA  
GGAAATGAGCTGGCTCTGCCAAGCAAATATGTGAATTTTTTATATTTAGCTAGTC  
ATTATGAAAAGTTGAAGGGTAGTCCAGAAGATAACGAACAAAAACAATTGTTTGT  
GGAGCAGCATAAGCATTATTTAGATGAGATTATTGAGCAAATCAGTGAATTTTCT  
AAGCGTGTTATTTTAGCAGATGCCAATTTAGATAAAGTTCTTAGTGATATAACA  
AACATAGAGACAAACCAATACGTGAACAAGCAGAAAATATTATTCATTTATTTAC  
GTTGACGAATCTTGGAGCTCCCGCTGCTTTTAAATATTTTGATACAACAATTGAT

CGTAAACGATATACGTCTACAAAAGAAGTTTTAGATGCCACTCTTATCCATCAAT  
CCATCACTGGTCTTTATGAAACACGCATTGATTTGAGTCAGCTAGGAGGTCCCTA  
GGGAGGTGGCTCAGAAGGTGGCGGATCTGAAGGTGGCTCTGGAactagtATGA  
GCGATAAAATTATTCACCTGACTGACGACAGTTTTGACACGGATGTAICTCAAAGC  
GGACGGGGCGATCCTCGTGCATTTCTGGGCAGAGTGGTGCGGTCCGTGCAAAA  
TGATCGCCCCGATTCTGGATGAAATCGCTGACGAATATCAGGGCAAACCTGACCG  
TTGCAAACCTGAACATCGATCAAAACCCTGGCACTGCGCCGAAATATGGCATCC  
GTGGTATCCCGACTCTGCTGCTGTTCAAAAACGGTGAAGTGGCGGCAACCAAA  
GTGGGTGCACTGTCTAAAGGTCAGTTGAAAGAGTTCCTCGACGCTAACCTGGCC  
GGTTCTGGTTCTGGCCATATGCACCATCATCATCATTCTTCTGGTCTGGTGC  
CACGCGGTTCTGGTATGAAAGAAACCGCTGCTGCTAAATTCGAACGCCAGCACA  
TGACAGCCCAGATCTGGGTACCGACGACGACGACAAGGCCATGGCTGATATC  
ggatccCATATGGAATGATGCTCGATAAGAAACAGATTCGTGCGATCTTTCTCTTT  
GAGTTTAAATGGGTGCGAAAGCGGCGGAGACGACGCGTAATATTAACAACGC  
GTTCCGTCTGGCACCGCGAACGAGCGTACCGTGCAATGGTGGTTCAAAAAGT  
TTCGCAAAGGCGACGAATCTCTGGAGGACGAAGAGCGTTCTGGCCGCCCGTCC  
GAGGTTGACAACGACCAGCTGCGTGCAATCATCGAAGCTGATCCGCTGACTAC  
CACCCGCGAAGTTGCTGAAGAACTGAATGTGGATCACTCTACTGTGGTTCCGCA  
CCTGAAACAGATCGGTAAAGTAAAAAACTGGACAAATGGGTTCCCTCATGAACT  
GTCTGAAAACCGAGAAAACCGTTCGTTTCGAAGTTAGCTCCTCTCTGATTCTGCGT  
AACAAACGAACCGTTCCTGGATCGTATCGTAACCTGTGATGAGAAATGGATT  
CTGTATGATAACCGTCCCGCTCTGCTCAGTGGCTGGATCGCGAAGAAGCTCC  
AAAACACTTCCCGAAACCGAATCTGCACCAGAAGAAAGTCATGGTAACCGTATG  
GTGGTCTGCCGCAGGTGTTATCCACTATTCCTTCTGAACCCGGGCGAAACTAT  
CACCAGCGAAAATACTGCCAGCAGATTGACGAAATGCACCGTAAACTGCAGCG  
TCTGCAGCCAGCACTGGTGAATCGTAAAGGTCCGATCCTGCTGCATGATAACGC  
CCGTCCGCACGTTGCCCAACCGACCCTGCAGAACTGAACGAACTGGGCTATG  
AAGTTCTGCCACACCCGCCGTAATCCCCGGATCTGTCCCCGACTGACTACCATT  
TCTTCAAGCATCTGGACAACCTTCCTGCAGGGTAAACGTTTTTACAACCAACAGG  
ACGCAGAAAACGCTTTCCAGGAGTTCGTGCGAAAGCCGTTCCACTGACTTCTACG  
CGACCGGTATCAACAAGCTGATCAGCCGTTGGCAGAAATGCGTGGACTGTAAC  
GGCAGCTACTTCGATTAAGACGTCTTAATAACTAAAAATATGGTATAATACTCTTA  
ATAAATGCAGTAATACAGGGGCTTTTCAAGACTGAAGTCTAGCTGAGACAAATA  
GTGCGATTACGAAATTTTTAGACAAAATAGTCTACGAGGTTTTAGAGCTATGC  
TGTTTTGAATGGTCCCAAACGGTTTTCCAGTCACGACGTTGTAAAACGAGTTT  
TAGAGCTATGCTGTTTTGAATGGTCCCAAACCTTCAGCACACTGAGACTTGTTGA  
GTTCCATGTTTTAGAGCTATGCTGTTTTGAATGGACTCCATTCAACATTGCCGAT  
GATAACTTGAGAAAGAGGGTTAATACCAGCAGTCGGATACCTTCTATTCTTTCT  
GTTAAAGCGTTTTCATGTTATAATAGGCAAAGAAGAGTAGTGTGATCGTCCATT  
CCGACAGCATCGCCAGTCACTATGGCGTGCTGCTAGCGCTATATGCGTTGATGC  
AATTTCTATGCGCACCCGTTCTCGGAGCACTGTCCGACCGCTTTGGCCGCCGC  
CCAGTCCTGCTCGCTTCGCTACTTGGAGCCACTATCGACTACGCGATCATGGCG  
ACCACACCCGTCCTGTGGATCCTCTACGCCGGACGCATCGTGGCCGGCATCAC  
CGGCGCCACAGGTGCGGTTGCTGGCGCCTATATCGCCGACATCACCGATGGGG

AAGATCGGGCTCGCCACTTCGGGCTCATGAGCGCTTGTTTTCGGCGTGGGTATG  
GTGGCAGGCCCGTGGCCGGGGACTGTTGGGCGCCATCTCCTTGCATGCAC  
CATTCTTGCGGCGGCGGTGCTCAACGGCCTCAACCTACTACTGGGCTGCTTC  
CTAATGCAGGAGTCGCATAAGGGAGAGCGTGCACCGATGCCCTTGAGAGCCTT  
CAACCCAGTCAGCTCCTTCCGGTGGGCGCGGGGCATGACTATCGTCGCCGCAC  
TTATGACTGTCTTCTTTATCATGCAACTCGTAGGACAGGTGCCGGCAGCGCTCT  
GGGTCATTTTCGGCGAGGACCGCTTTCGCTGGAGCGCGACGATGATCGGCCTG  
TCGCTTGCGGTATTCGGAATCTTGCACGCCCTCGCTCAAGCCTTCGTCACTGGT  
CCCGCCACCAAACGTTTCGGCGAGAAGCAGGCCATTATCGCCGGCATGGCGGC  
CGACGCGCTGGGCTACGTCTTGTCTGGCGTTCGCGACGCGAGGCTGGATGGCC  
TTCCCATTATGATTCTTCTCGCTTCCGGCGGCATCGGGATGCCCGCGTTGCAG  
GCCATGCTGTCCAGGCAGGTAGATGACGACCATCAGGGACAGCTTCAAGGATC  
GCTCGCGGCTCTTACCAGCCTAACTTCGATCATTGGACCGCTGATCGTCACGGC  
GATTTATGCCGCCTCGGCGAGCACATGGAACGGGTTGGCATGGATTGTAGGCG  
CCGCCCTATACCTTGTCTGCCTCCCCGCGTTGCGTCGCGGTGCATGGAGCCGG  
GCCACCTCGACCTGAATGGAAGCCGGCGGCACCTCGCTAACGGATTCACCACT  
CCAAGAATTGGAGCCAATCAATTCTTGCGGAGAACTGTGAATGCGCAAACCAAC  
CCTTGGCAGAACATATCCATCGCGTCCGCCATCTCCAGCAGCCGCACGCGGCG  
CATCTCGGGCAGCGTTGGGTCTGGCCACGGGTGCGCATGATCGTGCTCCTGT  
CGTTGAGGACCCGGCTAGGCTGGCGGGGTTGCCTTACTGGTTAGCAGAATGAA  
TCACCGATACGCGAGCGAACGTGAAGCGACTGCTGCTGCAAACGTCTGCGAC  
CTGAGCAACAACATGAATGGTCTTCCGGTTTCCGTGTTTCGTAAAGTCTGGAAAC  
GCGGAAGTCCCCTACGTGCTGCTGAAGTTGCCCGCAACAGAGAGTGGAACCAA  
CCGGTGATAACCACGATACTATGACTGAGAGTCAACGCCATGAGCGGCCTCATT  
CTTATTCTGAGTTACAACAGTCCGCACCGCTGTCCGGTAGCTCCTTCCGGTGGG  
CGCGGGGCATGACTATCGTCGCCGCACTTATGACTGTCTTCTTTATCATGCAAC  
TCGTAGGACAGGTGCCGGCAGCGCCCAACAGTCCCCCGGCCACGGGGCCTGC  
CACCATACCACGCCGAAACAAGCGCCCTGCACCATTATGTTCCGGATCTGCAT  
CGCAGGATGCTGCTGGCTACCCTGTGGAACACCTACATCTGTATTAACGAAGCG  
CTAACCGTTTTTATCAGGCTCTGGGAGGCAGAATAAATGATCATATCGTCAATTA  
TTACCTCCACGGGGAGAGCCTGAGCAAACCTGGCCTCAGGCATTTGAGAAGCAC  
ACGGTCACACTGCTTCCGGTAGTCAATAAACCGGTAAACCAGCAATAGACATAA  
GCGGCTATTTAACGACCCTGCCCTGAACCGACGACCGGGTGAATTTGCTTTCCG  
AATTTCTGCCATTCATCCGCTTATTATCACTTATTACAGGCGTAGCACCAAGCGTT  
TAAGGGCACCAATAACTGCCTTAAAAAAATTACGCCCGCCCTGCCACTCATCG  
CAGTACTGTTGTAATTCATTAAGCATTCTGCCGACATGGAAGCCATCACAGACG  
GCATGATGAACCTGAATCGCCAGCGGCATCAGCACCTTGTCGCCTTGCGTATAA  
TATTTGCCCATGGTGAAAACGGGGGCGAAGAAGTTGTCCATATTGGCCACGTTT  
AAATCAAACCTGGTGAAACTCACCCAGGGATTGGCTGAGACGAAAAACATATTC  
TCAATAAACCTTTAGGGAAATAGGCCAGGTTTTACCGTAACACGCCACATCTT  
GCGAATATATGTGTAGAAACTGCCGGAAATCGTCGTGGTATTCACTCCAGAGCG  
ATGAAAACGTTTCAGTTTGCTCATGGAAAACGGTGTAACAAGGGTGAACACTAT  
CCCATATCACCAGCTCACCGTCTTTCATTGCCATACG

pRC2311

TTTCTCTGTCCTTCCTGTGCGACGGTTACGCCGCTCCATGAGCTTATCGCGAAT  
AAATACCTGTGACGGAAGATCACTTCGCAGAATAAATAAATCCTGGTGTCCCTGT  
TGATACCGGGAAGCCCTGGGCCAACTTTTGGCGAAAATGAGACGTTGATCGGC  
ACGTAAGAGGTTCCAACCTTTCACCATAATGAAATAAGATCACTACCGGGCGTATT  
TTTTGAGTTATCGAGATTTTTCAGGAGCTAAGGAAGCTAAAATGGAGAAAAAATC  
ACTGGATATAACCACCGTTGATATATCCCAATGGCATCGTAAAGAACATTTTGAGG  
CATTTTCAGTCAGTTGCTCAATGTACCTATAACCAGACCGTTCAGCTGGATATTAC  
GGCCTTTTTAAAGACCGTAAAGAAAAATAAGCACAAGTTTTATCCGGCCTTTATT  
CACATTCTTGCCCGCCTGATGAATGCTCATCCGGAGTTCCGTATGGCAATGAAA  
GACGGTGAGCTGGTGATATGGGATAGTGTTACCCCTTGTTACACCGTTTTCCAT  
GAGCAAACCTGAAACGTTTTTCATCGCTCTGGAGTGAATACCACGACGATTTCCGG  
CAGTTTCTACACATATATTCGCAAGATGTGGCGTGTTACGGTGAAAACCTGGCC  
TATTTCCCTAAAGGGTTTATTGAGAATATGTTTTTCGTCTCAGCCAATCCCTGGG  
TGAGTTTCACCAGTTTTGATTTAAACGTGGCCAATATGGACAACCTTCTTCGCCCC  
CGTTTTTCACCATGGGCAAATATTATACGCAAGGCGACAAGGTGCTGATGCCGCT  
GGCGATTCAGGTTTCATCATGCCGTTTGTGATGGCTTCCATGTCGGCAGAATGCT  
TAATGAATTACAACAGTACTGCGATGAGTGGCAGGGCGGGGCGTAATTTTTTTA  
AGGCAGTTATTGGTGCCCTTAAACGCCTGGTTGCTACGCCTGAATAAGTGATAA  
TAAGCGGATGAATGGCAGAAATTCGATGATAAGCTGTCAAACATGAGAATTGGT  
CGACGGCGCGCCAAAGCTTGCATGCCTGCAGCCGCGTAACCTGGCAAATCGG  
TTACGGTTGAGTAATAAATGGATGCCCTGCGTAAGCGGGGCACATTTTCATTACC  
TCTTTCTCCGCACCCGACATAGATAATAACTTCGTATAGTATACATTATACGAAG  
TTATCTAGTAGACTTAATTAAGGATCGATCCGGCGCGCCAATAGTCATGCCCCG  
CGCCACCGGAAGGAGCTGACTGGGTTGAAGGCTCTCAAGGGCATCGGTCTGA  
GCTTGACATTGTAGGACTATATTGCTCTAATAAATTTGCGGCCGCTAATACGACT  
CACTATAGGGAGAGGATCCGCGGGATTACGAAATCATCCTGTGGAGCTTAGTAG  
GTTTAGCAAGATGGCAGCGCCTAAATGTAGAATGATAAAAGGATTAAGAGATTA  
ATTTCCCTAAAAATGATAAAACAAGCGTTTTTAAAAGCGCTTGTTTTTTTGGTTTGC  
AGTCAGAGTAGAATAGAAGTATCAAAAAAAGCACCGACTCGGTGCCACTTTTTTC  
AAGTTGATAACGGACTAGCCTTATTTTAACTTGCTATGCTGTTTTGAATGGTTCC  
AACAAGATTATTTTATAACTTTTATAACAAATAATCAAGGAGAAATTCAAAGAAAT  
TTATCAGCCATAAAACAATACTTAATACTATAGAATGATAACAAAATAAACTACTT  
TTAAAAGAATTTTTGTGTTATAATCTATTTATTATTAAGTATTGGGTAATATTTTTT  
GAAGAGCGGCCGCGTTAATAACAGGGGACGTGGTAATCCGTCCCCTTTTTATTT  
CTGACTGAGTTAATAACAGGCCTGCTTCGGCAGGCCTTTTTATTTCTGACTGAGT  
TCTTCTCAGGCCTGCTGGTAATCGCAGGCCTTTTTATTTTCTAGTCTGACTGACT  
GACTGACTGACTGACTGACTGACTGACTGACTGACTGACTGACTGACTGACTGA  
CTGACTGACTGACTGACTGACTGACTGACTGACTGACTGACTGACTGACTGACT  
GACTGACTGACTGACTGACTGACTGACTGACTGACTGACTGACTGACTGACTGA  
CTGACTGACCTCGAGATGGATAAGAAATACTCAATAGGCTTAGCTATCGGCACA  
AATAGCGTCCGATGGGCGGTGATCACTGATGAATATAAGGTTCCGTCTAAAAG  
TTCAAGGTTCTGGGAAATACAGACCGCCACAGTATCAAAAAAATCTTATAGGG  
GCTCTTTTATTTGACAGTGGAGAGACAGCGGAAGCGACTCGTCTCAAACGGACA

GCTCGTAGAAGGTATACACGTCGGAAGAATCGTATTTGTTATCTACAGGAGATTT  
TTTCAAATGAGATGGCGAAAGTAGATGATAGTTTCTTTCATCGACTTGAAGAGTC  
TTTTTTGGTGAAGAAGACAAGAAGCATGAACGTCATCCTATTTTTGGAAATATA  
GTAGATGAAGTTGCTTATCATGAGAAATATCCAACCTATCTATCATCTGCGAAAA  
AATTGGTAGATTCTACTGATAAAGCGGATTTGCGCTTAATCTATTTGGCCTTAGC  
GCATATGATTAAGTTTCGTGGTCATTTTTTATTGATTGAGGGAGATTTAAATCCTGAT  
AATAGTGATGTGGACAACTATTTATCCAGTTGGTACAAACCTACAATCAATTATT  
TGAAGAAAACCTATTAACGCAAGTGGAGTAGATGCTAAAGCGATTCTTTCTGCA  
CGATTGAGTAAATCAAGACGATTAGAAAATCTCATTGCTCAGCTCCCCGGTGAG  
AAGAAAAATGGCTTATTTGGGAATCTCATTGCTTTGTCATTGGGTTTGACCCCTA  
ATTTTAAATCAAATTTTATTGTTTGGCAGAAGATGCTAAATTACAGCTTTCAAAGAT  
ACTTACGATGATGATTTAGATAATTTATTGGCGCAAATTGGAGATCAATATGCTG  
ATTTGTTTTTGGCAGCTAAGAATTTATCAGATGCTATTTTACTTTTCAGATATCCTA  
AGAGTAAATACTGAAATAACTAAGGCTCCCCTATCAGCTTCAATGATTAACGCT  
ACGATGAACATCATCAAGACTTACTCTTTTAAAAGCTTTAGTTTCGACAACA  
TCCAGAAAAGTATAAAGAAATCTTTTTTATCAATCAAAAAACGGATATGCAGGT  
TATATTGATGGGGGAGCTAGCCAAGAAGAATTTTATAAATTTATCAAACCAATTTT  
AGAAAAAATGGATGGTACTGAGGAATTATTGGTGAAGTAAATCGTGAAGATTTG  
CTGCGCAAGCAACGGACCTTTGACAACGGCTCTATTCCCATCAAATTCATTG  
GGTGAGCTGCATGCTATTTTGAAGAACAAGAAGACTTTTATCCATTTTTAAAG  
ACAATCGTGAGAAGATTGAAAAAATCTTGACTTTTCGAATTCCTTATTATGTTGGT  
CCATTGGCGCGTGGCAATAGTCGTTTTGCATGGATGACTCGGAAGTCTGAAGAA  
ACAATTACCCCATGGAATTTTGAAGAAGTTGTCGATAAAGGTGCTTCAGCTCAAT  
CATTTATTGAACGCATGACAACTTTGATAAAAATCTTCAAATGAAAAAGTACTA  
CCAAAACATAGTTTGCTTTATGAGTATTTTACGGTTTATAACGAATTGACAAAGGT  
CAAATATGTTACTGAAGGAATGCGAAAACCAGCATTTCCTTCAGGTGAACAGAA  
GAAAGCCATTGTTGATTTACTCTTCAAACAAATCGAAAAGTAACCGTTAAGCAA  
TTAAAAGAAGATTATTTCAAAAAAATAGAATGTTTTGATAGTGTTGAAATTTGAGG  
AGTTGAAGATAGATTTAATGCTTCATTAGGTACCTACCATGATTTGCTAAAATTA  
TTAAAGATAAAGATTTTTTGGATAATGAAGAAAATGAAGATATCTTAGAGGATATT  
GTTTTAACATTGACCTTATTTGAAGATAGGGAGATGATTGAGGAAAGACTTAAAA  
CATATGCTCACCTCTTTGATGATAAGGTGATGAAACAGCTTAAACGTCGCCGTTA  
TACTGGTTGGGGACGTTTGTCTCGAAAATTGATTAATGGTATTAGGGATAAGCAA  
TCTGGCAAACAATATTAGATTTTTTGAATCAGATGGTTTTGCCAATCGCAATTT  
TATGCAGCTGATCCATGATGATAGTTTACATTTAAAGAAGACATTCAAAAAGCA  
CAAGTGTCTGGACAAGGCGATAGTTTACATGAACATATTGCAAATTTAGCTGGTA  
GCCCTGCTATTA AAAAAGGTATTTTACAGACTGTAAAAGTTGTTGATGAATTGGT  
CAAAGTAATGGGGCGGCATAAGCCAGAAAATATCGTTATTGAAATGGCACGTGA  
AAATCAGACAACCTCAAAGGGCCAGAAAATTCGCGAGAGCGTATGAAACGAAT  
CGAAGAAGGTATCAAAGAATTAGGAAGTCAGATTCTTAAAGAGCATCCTGTTGA  
AAATACTCAATTGCAAATGAAAAGCTCTATCTCTATTATCTCAAATGGAAGA  
GACATGTATGTGGACCAAGAATTAGATATTAATCGTTTAAAGTGATTATGATGTCG  
ATGCCATTGTTCCACAAAGTTTCCTTAAAGACGATTCAATAGACAATAAGGTCTT  
AACGCGTTCTGATAAAAATCGTGGTAAATCGGATAACGTTCCAAGTGAAGAAGT

AGTCAAAAAGATGAAAACTATTGGAGACAACCTTCTAAACGCCAAGTTAATCACT  
CAACGTAAGTTTGATAATTTAACGAAAGCTGAACGTGGAGGTTTGAGTGAACCTTG  
ATAAAGCTGGTTTTATCAAACGCCAATTGGTTGAAACTCGCCAAATCACTAAGCA  
TGTGGCACAAATTTTGGATAGTCGCATGAATACTAAATACGATGAAAATGATAAA  
CTTATTCGAGAGGTTAAAGTGATTACCTTAAATCTAAATTAGTTTCTGACTTCCG  
AAAAGATTTCCAATTCTATAAAGTACGTGAGATTAACAATTACCATCATGCCCAT  
GATGCGTATCTAAATGCCGTGTTGGAACCTGCTTTGATTAAGAAATATCCAAAAC  
TTGAATCGGAGTTTGTCTATGGTGATTATAAAGTTTATGATGTTTCGTAAAATGATT  
GCTAAGTCTGAGCAAGAAATAGGCAAAGCAACCGCAAATATTTCTTTTACTCTA  
ATATCATGAACTTCTTCAAACAGAAATTACACTTGCAAATGGAGAGATTCGCAA  
ACGCCCTCTAATCGAAACTAATGGGGAAACTGGAGAAATTGTCTGGGATAAAGG  
GCGAGATTTTGGCACAGTGCGCAAAGTATTGTCCATGCCCAAGTCAATATTGT  
CAAGAAAACAGAAGTACAGACAGGCGGATTCTCCAAGGAGTCAATTTTACCAA  
AAGAAATTCGGACAAGCTTATTGCTCGTAAAAAAGACTGGGATCCAAAAAATAT  
GGTGGTTTTGATAGTCCAACGGTAGCTTATTAGTCCTAGTGGTTGCTAAGGTG  
GAAAAAGGAAATCGAAGAAGTTAAATCCGTTAAAGAGTTACTAGGGATCACA  
ATTATGGAAAGAAGTTCCTTTGAAAAAATCCGATTGACTTTTTAGAAAGCTAAAG  
GATATAAGGAAGTTAAAAAAGACTTAATCATTAAACTACCTAAATATAGTCTTTTT  
GAGTTAGAAAACGGTCGTAAACGGATGCTGGCTAGTGCCGGAGAATTACAAAA  
GGAAATGAGCTGGCTCTGCCAAGCAAATATGTGAATTTTTTATATTTAGCTAGTC  
ATTATGAAAAGTTGAAGGGTAGTCCAGAAGATAACGAACAAAAACAATTGTTTGT  
GGAGCAGCATAAGCATTATTTAGATGAGATTATTGAGCAAATCAGTGAATTTTCT  
AAGCGTGTTATTTTAGCAGATGCCAATTTAGATAAAGTTCTTAGTGATATAACA  
AACATAGAGACAAACCAATACGTGAACAAGCAGAAAATATTATTCATTTATTTAC  
GTTGACGAATCTTGGAGCTCCCGCTGCTTTTAAATATTTTGATAACAACATTGAT  
CGTAAACGATATACGTCTACAAAAGAAGTTTTAGATGCCACTCTTATCCATCAAT  
CCATCACTGGTCTTTATGAAACACGCATTGATTTGAGTCAGCTAGGAGGTCCTA  
GGGGAGGTGGCTCAGAAGGTGGCGGATCTGAAGGTGGCTCTGGAACCTAGTATG  
AGCGATAAAATTATTCACCTGACTGACGACAGTTTTGACACGGATGTAACAAAG  
CGGACGGGGCGATCCTCGTCGATTTCTGGGCAGAGTGGTGCGGTCCGTGCAAA  
ATGATCGCCCCGATTCTGGATGAAATCGCTGACGAATATCAGGGCAAACCTGACC  
GTTGCAAACCTGAACATCGATCAAACCCTGGCACTGCGCCGAAATATGGCATC  
CGTGGTATCCCGACTCTGCTGCTGTTCAAAAACGGTGAAGTGGCGGCAACCAAA  
GTGGGTGCACTGTCTAAAGGTCAGTTGAAAGAGTTCCTCGACGCTAACCTGGCC  
GGTTCTGGTTCTGGCCATATGCACCATCATCATCATTCTTCTGGTCTGGTGC  
CACGCGGTTCTGGTATGAAAGAAACCGCTGCTGCTAAATTCGAACGCCAGCACA  
TGGACAGCCCAGATCTGGGTACCGACGACGACGACAAGGCCATGGCTGATATC  
GGATCCCATATGAAATGATGCTCGATAAGAAACAGATTCGTGCGATCTTTCTCT  
TTGAGTTTAAATGGGTGCGCAAAGCGGCGGAGACGACGCGTAATATTAACAACG  
CGTTCGGTCTTGGCACCGCGAACGAGCGTACCGTGCAATGGTGGTTCAAAAAG  
TTTCGCAAAGGCGACGAATCTCTGGAGGACGAAGAGCGTTCTGGCCGCCCGTCT  
CGAGGTTGACAACGACCAGCTGCGTGCAATCATCGAAGCTGATCCGCTGACTA  
CCACCCGCGAAGTTGCTGAAGAACTGAATGTGGATCACTCTACTGTGGTTCCGCC  
ACCTGAAACAGATCGGTAAAGTAAAAAAGTGGACAAATGGGTTCTCATGAAC



TGTCTGAAAACCAGAAAAACCGTCGTTTTCGAAGTTAGCTCCTCTCTGATTCTGCG  
TAACAACAACGAACCGTTCCTGGATCGTATCGTAACCTGTGATGAGAAATGGAT  
TCTGTATGATAACCGTCGCCGCTCTGCTCAGTGGCTGGATCGCGAAGAAGCTCC  
AAAACACTTCCCGAAACCGAATCTGCACCAGAAGAAAGTCATGGTAACCGTATG  
GTGGTCTGCCGCAGGTGTTATCCACTATTCCTTCTGAACCCGGGCGAAACTAT  
CACCAGCGAAAAATACTGCCAGCAGATTGACGAAATGCACCGTAAACTGCAGCG  
TCTGCAGCCAGCACTGGTGAATCGTAAAGGTCCGATCCTGCTGCATGATAACGC  
CCGTCCGCACGTTGCCCAACCGACCCTGCAGAACTGAACGAACTGGGCTATG  
AAGTTCTGCCACACCCGCCGTACTCCCCGGATCTGTCCCCGACTGACTACCATT  
TCTTCAAGCATCTGGACAACCTTCTGCAGGGTAAACGTTTTTCACAACCAACAGG  
ACGCAGAAAACGCTTTCCAGGAGTTCGTGCGAAAGCCGTTCCACTGACTTCTACG  
CGACCGGTATCAACAAGCTGATCAGCCGTTGGCAGAAATGCGTGGACTGTAAC  
GGCAGCTACTTCGATTAAGACGTCTTAATAACTAAAAATATGGTATAATACTCTTA  
ATAAATGCAGTAATACAGGGGCTTTTCAAGACTGAAGTCTAGCTGAGACAAATA  
GTGCGATTACGAAATTTTTTAGACAAAAATAGTCTACGAGGTTTTAGAGCTATGC  
TGTTTTGAATGGTCCCAAACGGTTTTCCAGTCACGACGTTGTAAAACGAGTTT  
TAGAGCTATGCTGTTTTGAATGGTCCCAAACCTTCAGCACACTGAGACTTGTTGA  
GTTCCATGTTTTAGAGCTATGCTGTTTTGAATGGACTCCATTCAACATTGCCGAT  
GATAACTTGAGAAAGAGGGTTAATACCAGCAGTCGGATACCTTCCTATTCTTTCT  
GTTAAAGCGTTTTTCATGTTATAATAGGCCAAAAGAAGAGTAGTGTGATCGCCGCG  
GATCCTTCTATAGTGTACCTAAATGTGACGGCCAGGCGGCCGCGCCAGGCCTA  
CCCCTAGTCAATTCGGGAGGATCGAAACGGCAGATCGCAAAAAACAGTACATA  
CAGAAGGAGACATGAACATGAACATCAAAAAAATTGTAAAACAAGCCACAGTTCT  
GACTTTTACGACTGCACTTCTGGCAGGAGGAGCGACTCAAGCCTTCGCGAAAGA  
AAATAACCAAAAAGCATACAAAGAAACGTACGGCGTCTCTCATATTACAGCCAT  
GATATGCTGCAGATCCCTAAACAGCAGCAAACGAAAAATACCAAGTGCCTCAA  
TTCGATCAATCAACGATTA AAAATATTGAGTCTGCAAAAGGACTTGATGTGTGGG  
ACAGCTGGCCGCTGCAAAACGCTGACGGAACAGTAGCTGAATACAACGGCTAT  
CACGTTGTGTTTGCTCTTGCGGGAAGCCCGAAAGACGCTGATGACACATCAATC  
TACATGTTTTATCAAAGGTTCGGCGACAACCTCAATCGACAGCTGGAAAAACGCG  
GGCCGTGTCTTTAAAGACAGCGATAAGTTCGACGCCAACGATCCGATCCTGAAA  
GATCAGACGCAAGAATGGTCCGGTTCTGCAACCTTTACATCTGACGGAAAAATC  
CGTTTATTCTACACTGACTATTCCGGTAAACATTACGGCAAACAAAGCCTGACAA  
CAGCGCAGGTAAATGTGTCAAATCTGATGACACACTCAAATCAACGGAGTGG  
AAGATCACAAAACGATTTTTGACGGAGACGAAAAACATATCAGAACGTTTCAGC  
AGTTTATCGATGAAGGCAATTATACATCCGGCGACAACCATACGCTGAGAGACC  
CTCACTACGTTGAAGACAAAGGCCATAAATACCTTGTATTGAAAGCCAACACGG  
GAACAGAAAACGGATACCAAGGCCGAAGAATCTTTATTTAACAAAGCGTACTACG  
GCGGCGGCACGAACTTCTCCGTAAAGAAAGCCAGAAGCTTCAGCAGAGCGCT  
AAAAACGCGATGCTGAGTTAGCGAACGGCGCCCTCGGTATCATAGAGTTAAAT  
AATGATTACACATTGAAAAAAGTAATGAAGCCGCTGATCACTTCAAACACGGTAA  
CTGATGAAATCGAGCGCGGAATGTTTTCAAATGAACGGCAAATGGTACTTGT  
TCACTGATTCACGCGGTTCAA AAAATGACGATCGATGGTATTA ACTCAAACGATAT  
TTACATGCTTGGTTATGTATCAA ACTCTTAAACCGGCCCTTACAAGCCGCTGAAC

AAAACAGGGCTTGTGCTGCAAATGGGTCTTGATCCAAACGATGTGACATTCACT  
TACTCTCACTTCGCAGTGCCGCAAGCCAAAGGCAACAATGTGGTTATCACAAGC  
TACATGACAAACAGAGGCTTCTTCGAGGATAAAAAGGCAACATTTGCGCCAAGC  
TTCTTAATGAACATCAAAGGCAATAAAAACATCCGTTGTCAAAAACAGCATCCTGG  
AGCAAGGACAGCTGACAGTCAACTAATAACAGCAAAAAGAAAATGCCGATACTT  
CATTGGCATTTCCTTTTATTTCTCAACAAGATGGTGAATTGACTAGTGGGTAGAT  
CCACAGGACGGGTGTGGTCGCCATGATCGCGTAGTCGATAGTGGCTCCAAGTA  
GCGAAGCGAGCAGGACTGGGCGGCGGCCAAAGCGGTTCGGACAGTGCTCCGAG  
AACGGGTGCGCATAGAAATTGCATCAACGCATATAGCGCTAGCAGCACGCCATA  
GTGACTGGCGATGCTGTCCGAATGGACGATATCCCGCAAGAGGCCCGGCAGTA  
CCGGCATAACCAAGCCTATGCCTACAGCATCCAGGGTGACGGTGCCGAGGATG  
ACGATGAGCGCATTGTTAGATTTTCATACACGGTGCCTGACTGCGTTAGCAATTTA  
ACTGTGATAAACTACCGCATTAAAGCTTATCGATGATAAGCTGTCAAACATGAGA  
ATTGATCCGGAACCCTTAATATAACTTCGTATAATGTATGCTATACGAAGTTATTA  
GGTCCCTCGACTATAGGGTCACCGTCGACAGCGACACACTTGCATCGGATGCA  
GCCCGGTTAACGTGCCGGCACGGCCTGGGTAAACCAGGTATTTTGTCCACATAA  
CCGTGCGCAAATGTTGTGGATAAGCAGGACACAGCAGCAATCCACAGCAGGC  
ATACAACCGCACACCGAGGTTACTCCGTTCTACAGGTTACGACGACATGTCAAT  
ACTTGCCCTTGACAGGCATTGATGGAATCGTAGTCTCACGCTGATAGTCTGATC  
GACAATACAAGTGGGACCGTGGTCCCAGACCGATAATCAGACCGACAACACGA  
GTGGGATCGTGGTCCCAGACTAATAATCAGACCGACGATACGAGTGGGACCGT  
GGTCCCAGACTAATAATCAGACCGACGATACGAGTGGGACCGTGGTTCCAGAC  
TAATAATCAGACCGACGATACGAGTGGGACCGTGGTCCCAGACTAATAATCAGA  
CCGACGATACGAGTGGGACCATGGTCCCAGACTAATAATCAGACCGACGATAC  
GAGTGGGACCGTGGTCCCAGTCTGATTATCAGACCGACGATACGAGTGGGACC  
GTGGTCCCAGACTAATAATCAGACCGACGATACGAGTGGGACCGTGGTCCCAG  
ACTAATAATCAGACCGACGATACGAGTGGGACCGTGGTCCCAGTCTGATTATCA  
GACCGACGATACAAGTGGAACAGTGGGCCCAGAGAGAATATTCAGGCCAGTTA  
TGCTTTCTGGCCTGTAACAAAGGACATTAAGTAAAGACAGATAAACGTAGACTAA  
AACGTGGTTCGCATCAGGGTGCTGGCTTTTCAAGTTCCTTAAGAATGGCCTCAAT  
TTTCTCTATACACTCAGTTGGAACACGAGACCTGTCCAGGTTAAGCACCATTTTA  
TCGCCCTTATACAATACTGTGCTCCAGGAGCAAACCTGATGTCGTGAGCTTAAA  
CTAGTTCTTGATGCAGATGACGTTTTAAGCACAGAAGTTAAAAGAGTGATAACTT  
CTTCAGCTTCAAATATCACCCAGCTTTTTTCTGCTCATGAAGGTTAGATGCCTG  
CTGCTTAAGTAATTCCTCTTTATCTGTAAAGGCTTTTTGAAGTGCATCACCTGAC  
CGGGCAGATAGTTCACCGGGGTGAGAAAAAAGAGCAACAACCTGATTTAGGCAAT  
TTGGCGGTGTTGATACAGCGGGTAATAATCTTACGTGAAATATTTTCCGCATCAG  
CCAGCGCAGAAATATTTCCAGCAAATTCATTCTGCAATCGGCTTGCATAACGCT  
GACCACGTTTATAAGCACTTGTGGGCGATAATCGTTACCCAATCTGGATAATG  
CAGCCATCTGCTCATCATCCAGCTCGCCAACCAGAACACGATAATCACTTTCCG  
TAAGTGCAGCAGCTTACGACGGCGACTCCCATCGGCAATTTCTATGACACCAG  
ATACTCTTCGACCGAACGCCGGTGTCTGTTGACCAGTCAGTAGAAAAGAAGGGA  
TGAGATCATCCAGTGCGTCCTCAGTAAGCAGCTCCTGGTCACGTTTATTACCTG  
ACCATACCCGAGAGGTCTTCTCAACACTATCACCCCGGAGCACTTCAAGAGTAA

ACTTCACATCCCGACCACATACAGGCAAAGTAATGGCATTACCGCGAGCCATTA  
CTCCTACGCGCGCAATTAACGAATCCACCATCGGGGCAGCTGGTGTGATAAC  
GAAGTATCTTCAACCGGTTGAGTATTGAGCGTATGTTTTGGAATAACAGGCGCA  
CGCTTCATTATCTAATCTCCCAGCGTGGTTTAATCAGACGATCGAAAATTTTCATT  
GCAGACAGGTTCCCAAATAGAAAGAGCATTCTCCAGGCACCAGTTGAAGAGCG  
TTGATCAATGGCCTGTTCAAAAACAGTTCTCATCCGGATCTGACCTTTACCAACT  
TCATCCGTTTCACGTACAACATTTTTTTAGAACCATGCTTCCCCAGGCATCCCGAA  
TTTGCTCCTCCATCCACGGGGACTGAGAGCCATTACTATTGCTGTATTTGGTAA  
GCAAATACGTACATCAGGCTCGAACCCTTTAAGATCAACGTTCTTGAGCAGAT  
CACGAAGCATATCGAAAACTGCAGTGC GGAGGTGTAGTCAAACAACCTCAGCAG  
GCGTGGGAACAATCAGCACATCAGCAGCACATACGACATTAATCGTGCCGATAC  
CCAGGTTAGGCGCGCTGTCAATAACTATGACATCATAGTCATGAGCAACAGTTT  
CAATGGCCAGTCGGAGCATCAGGTGTGGATCGGTGGGCAGTTTACCTTCATCAA  
ATTTGCCCATTAACCTCAGTTTCAATACGGTGCAGAGCCAGACAGGAAGGAATAA  
TGTC AAGCCCCGGCCAGCAAGTGGGCTTTATTGCATAAGTGACATCGTCCTTTT  
CCCCAAGATAGAAAGGCAGGAGAGTGTCTTCTGCATGAATATGAAGATCTGGTA  
CCCATCCGTGATACATTGAGGCTGTTCCCTGGGGGTGCTTACCTTCCACGAGCA  
AAACACGTAGCCCCTTCAGAGCCAGATCCTGAGCAAGATGAACAGAACTGAG  
GTTTTGTAAACGCCACCTTTATGGGCAGCAACCCCGATCACCGGTGGAAATACG  
TCTTCAGCACGTTCGCAATCGCGTACCAAACACATCACGCATATGATTAATTTGTT  
CAATTGTATAACCAACACGTTGCTCAACCCGTCTCGAATTTCCATATCCGGGTG  
CGGTAGTCGCCCTGCTTTCTCGGCATCTCTGATAGCCTGAGAAGAAACCCCAAC  
TAAATCCGCTGCTTACCTATTCTCCAGCGCCGGGTTATTTTCTCGCTTCCGG  
GCTGTCATCATTAACCTGTGCAATGGCGATAGCCTTCGTCATTTTCATGACCAGC  
GTTTATGCACTGGTTAAGTGTTCATGAGTTTCATTCTGAACATCCTTTAATCAT  
TGCTTTGCGTTTTTTTTATTAAATCTTGCAATTTACTGCAAAGCAACAACAAAATCG  
CAAAGTCATCAAAAAACCGCAAAGTTGTTTAAAATAAGAGCAACACTACAAAAGG  
AGATAAGAAGAGCACATACCTCAGTCACTTATTATCACTAGCGCTCGCCGCAGC  
CGTGTAACCGAGCATAGCGAGCGAACTGGCGAGGAAGCAAAGAAGAACTGTTT  
TGTCAGATAGCTCTTACGCTCAGCGCAAGAAGAAATATCCACCGTGGGAAAAAC  
TCCAGGTAGAGGTACACACGCGGATAGCCAATTCAGAGTAATAAACTGTGATAA  
TCAACCCTCATCAATGATGACGAACTAACCCCGATATCAGGTCACATGACGAA  
GGGAAAGAGAAGGAAATCAACTGTGACAACTGCCCTCAAATTTGGCTTCCTTA  
AAAATTACAGTTCAAAAAGTATGAGAAAATCCATGCAGGCTGAAGGAAACAGCA  
AACTGTGACAAATTACCCTCAGTAGGTCAGAACAATGTGACGAACCACCCTC  
AAATCTGTGACAGATAACCCTCAGACTATCCTGTGTCATGGAAGTGATATCGC  
GGAAGGAAAATACGATATGAGTCGTCTGGCGGCCTTTCTTTTTCTCAATGTATGA  
GAGGCGCATTGGAGTTCTGCTGTTGATCTCATTAAACACAGACCTGCAGGAAGCG  
GCGGCGGAAGTCAGGCATACGCTGGTAACTTTGAGGCAGCTGGTAAACGCTCTA  
TGATCCAGTCGATTTTCAGAGAGACGATGCCTGAGCCATCCGGCTTACGATACT  
GACACAGGGATTTCGTATAAACGCATGGCATAACGGATTGGTGATTTCTTTTGTTC  
ACTAAGCCGAACTGCGTAAACCGGTTCTGTAACCCGATAAAGAAGGGAATGAG  
ATATGGGTTGATATGTACACTGTAAAGCCCTCTGGATGGACTGTGCGCACGTTT  
GATAAACCAAGGAAAAGATTCATAGCCTTTTTTCATCGCCGGCATCCTCTTCAGG

GCGATAAAAAACCACTTCCTTCCCCGCGAAACTCTTCAATGCCTGCCGTATATC  
CTTACTGGCTTCCGCAGAGGTCAATCCGAATATTTTCAGCATATTTAGCAACATGG  
ATCTCGCAGATACCGTCATGTTCCCTGTAGGGTGCCATCAGATTTTCTGATCTGGT  
CAACGAACAGATACAGCATAACGTTTTTTCATCCCGGGAGAGACTATATGCCGCCT  
CAGTGAGGTCGTTTACTGGACGATTCGCGGGCTATTTTACGTTTCTTGTGATT  
GATAACCGCTGTTTCCGCCATGACAGATCCATGTGAAGTGTGACAAGTTTTTAG  
ATTGTCACACTAAATAAAAAAGAGTCAATAAGCAGGGATAACTTTGTGAAAAAC  
AGCTTCTTCTGAGGGCAATTTGTCACAGGGTTAAGGGCAATTTGTCACAGACAG  
GACTGTCATTTGAGGGTGATTTGTCACACTGAAAGGGCAATTTGTCACAACACC  
TTCTCTAGAACCAGCATGGATAAAGGCCTACAAGGCGCTCTAAAAAGAAGATC  
TAAAAACTATAAAAAAATAATTATAAAAAATATCCCCGTGGATAAGTGGATAACC  
CCAAGGGAAGTTTTTTCAGGCATCGTGTGTAAGCAGAATATAAAGTGCTGTTCC  
CTGGTGCTTCCCTCGCTCACTCGAGGGCTTCGCCCTGTCGCTCAACTGCGGGCA  
GCACTACTGGCTGTAAAAGGACAGACCACATCATGGTTCTGTGTTTATTAGGTT  
GTTCTGTCCATTGCTGACATAATCCGCTCCACTTCAACGTAACACCGCACGAAG  
ATTTCTATTGTTCCCTGAAGGCATATTCAAATCGTTTTCGTTACCGCTTGCAGGCA  
TCATGACAGAACACTACTTCTATAAACGCTACACAGGCTCCTGAGATTAATAAT  
GCGGATCTCTACGATAATGGGAGATTTTCCCGACTGTTTCGTTTCGCTTCTCAGT  
GGATAACAGCCAGCTTCTCTGTTTAAACAGACAAAAACAGCATATCCACTCAGTTC  
CACATTTCCATATAAAGGCCAAGGCATTTATTCTCAGGATAATTGTTTCAGCATC  
GCAACCGCATCAGACTCCGGCATCGAAACTGCACCCGGTGCCGGGCAGCCAC  
ATCCAGCGCAAAAACCTTCGTGTAGACTTCCGTTGAACTGATGGACTTATGTCC  
CATCAGGCTTTGCAGAACTTTAGCGGTATACCGGCATACAGCATGTGCATCGC  
ATAGGAATGGCGGAACGTATGTGGTGTGACCGGAACAGAGAACGTCACACCGT  
CAGCAGCAGCGGCGGCAACCGCCTCCCCAATCCAGGTCCTGACCGTTCTGTCC  
GTCACTTCCCAGATCCGCGC

pRC2312

GGTCGGGCTGAACGGGGGGTTCGTGCACACAGCCCAGCTTGGAGCGAACGAC  
CTACACCGAACTGAGATACCTACAGCGTGAGCTATGAGAAAGCGCCACGCTTCC  
CGAAGGGAGAAAGGCGGACAGGTATCCGGTAAGCGGCAGGGTTCGGAACAGGA  
GAGCGCACGAGGGAGCTTCCAGGGGGAAACGCCTGGTATCTTTATAGTCCTGT  
CGGGTTTCGCCACCTCTGACTTGAGCGTCGATTTTTGTGATGCTCGTCAGGGGG  
GCGGAGCCTATGGAAAAACGCCAGCAACGCGGCCTTTTTACGGTTCCTGGCCT  
TTTGCTGGCCTTTTGCTCACATGTTCTTTCCTGCGTTATCCCCTGATTCTGTGGA  
TAACCGTATTACCGCCTTTGAGTGAGCTGATACCGCTCGCCGCAGCCGAACGAC  
CGAGCGCAGCGAGTCAGTGAGCGAGGAAGCGGAAGAGCGCCCAATACGCAAA  
CCGCCTTCCCCGCGCGTTGGCCGATTCATTAATGCAGCTGGCAGCAGAGGTT  
TCCCGACTGGAAAGCGGGCAGTGAGCGCAACGCAATTAATGTGAGTTAGCTCA  
CTCATTAGGCACCCAGGCTTTACACTTTATGCTTCCGGCTCGTATGTTGTGTG  
GAATTGTGAGCGGATAACAATTTACACAGGAAACAGCTATGACCATGATTACG  
CCAAGCGCGCAATTAACCCTCACTAAAGGGGAACAAAAGCTGGAGCTCCACCGC  
GGTGGCGGCGCTCTAGAAGTAGTGGATCCCCCGGGCTGCAGGAATTCGATAT

CAAGCTTATCGATACCGTCGACCTCGAGGGGGGGCCCGGTACCCAATTCGCCC  
TATAGTGAGTCGTATTACGCGCGCTCACTGGCCGTCGTTTTACAACGTCGTGAC  
TGGGAAAACCCCTGGCGTTACCCAACCTTAATCGCCTTGCAGCACATCCCCCTTTC  
GCCAGCTGGCGTAATAGCGAAGAGGCCCGCACCGATCGCCCTTCCAACAGTT  
GCGCAGCCTGAATGGCGAATGGGACGCGCCCTGTAGCGGCGCATTAAAGCGCG  
GCGGGTGTGGTGGTTACGCGCAGCGTGACCGCTACACTTGCCAGCGCCCTAGC  
GCCCGCTCCTTTTCGCTTTCTTCCCTTCTTTCTCGCCACGTTTCGCCGGCTTTCC  
CCGTCAAGCTCTAAATCGGGGGCTCCCTTTAGGGTTCCGATTTAGTGCTTTACG  
GCACCTCGACCCCAAAAACTTGATTAGGGTGATGGTTCACGTAGTGCAATTTA  
GGTGGCACTTTTCGGGGAAATGTGCGCGGAACCCCTATTTGTTATTTTTCTAAA  
TACATTCAAATATGTATCCGCTCATGAGACAATAACCCTGATAAATGCTTCAATA  
ATATTGAAAAGGAAGAGTATGAGTATTCAACATTTCCGTGTCGCCCTTATTCCC  
TTTTTTGCGGCATTTTGCCTTCTGTTTTTGCTCACCCAGAAACGCTGGTGAAG  
TAAAAGATGCTGAAGATCAGTTGGGTGCACGAGTGGGTACATCGAACTGGATC  
TCAACAGCGGTAAGATCCTTGAGAGTTTTCGCCCCGAAGAACGTTTTCCAATGA  
TGAGCACTTTTAAAGTTCTGCTATGTGGCGCGGTATTATCCCGTATTGACGCCG  
GGCAAGAGCAACTCGGTGCGCCGCATACACTATTCTCAGAATGACTTGGTTGAGT  
ACTCACCAGTCACAGAAAAGCATCTTACGGATGGCATGACAGTAAGAGAATTAT  
GCAGTGCTGCCATAACCATGAGTGATAACACTGCGGCCAACTTACTTCTGACAA  
CGATCGGAGGACCGAAGGAGCTAACCGCTTTTTTGCACAACATGGGGGATCAT  
GTA ACTCGCCTTGATCGTTGGGAACCGGAGCTGAATGAAGCCATACCAAACGAC  
GAGCGTGACACCACGATGCCTGTAGCAATGGCAACAACGTTGCGCAA ACTATTA  
ACTGGCGAACTACTTACTCTAGCTTCCCGGCAACAATTAATAGACTGGATGGAG  
GCGGATAAAGTTGCAGGACC ACTTCTGCGCTCGGCCCTTCCGGCTGGCTGGTT  
TATTGCTGATAAATCTGGAGCCGGTGAGCGTGGGTCTCGCGGTATCATTGCAGC  
ACTGGGGCCAGATGGTAAGCCCTCCCGTATCGTAGTTATCTACACGACGGGGA  
GTCAGGCAACTATGGATGAACGAAATAGACAGATCGCTGAGATAGGTGCCTCAC  
TGATTAAGCATTGGTAACTGTCAGACCAAGTTTACTCATATATACTTTAGATTGAT  
TTAAA ACTTCATTTTTAATTTAAAAGGATCTAGGTGAAGATCCTTTTTGATAATCT  
CATGACCAAATCCCTTAACGTGAGTTTTCGTTCCACTGAGCGTCAGACCCCGT  
AGAAAAGATCAAAGGATCTTCTTGAGATCCTTTTTTTCTGCGCGTAATCTGCTGC  
TTGCAAACAAAAAAACCACCGCTACCAGCGGTGGTTTTGTTTGCCGGATCAAGAG  
CTACCAA CTCTTTTTCCGAAGGTA ACTGGCTTCAGCAGAGCGCAGATACCAAAT  
ACTGTCCTTCTAGTGTAGCCGTAGTTAGGCCACCACTTCAAGAACTCTGTAGCA  
CCGCCTACATACCTCGCTCTGCTAATCCTGTTACCAGTGGCTGCTGCCAGTGGC  
GATAAGTCGTGTCTTACCGGGTTG GACTCAAGACGATAGTTACCGGATAAGGCG  
CAGCGGTCGGGCTGAACGGGGGGTTCGTGCACACAGCCCAGCTTGGAGCGAA  
CGACCTACACCGAACTGAGATACCTACAGCGTGAGCTATGAGAAAGCGCCACG  
CTTCCCGAAGGGAGAAAGGCGGACAGGTATCCGGTAAGCGGCAGGGTCCGGAA  
CAGGAGAGCGCACGAGGGAGCTTCCAGGGGGAAACGCCTGGTATCTTTATAGT  
CCTGTGCGGTTTTCGCCACCTCTGACTTGAGCGTCGATTTTTGTGATGCTCGTCA  
GGGGGGCGGAGCCTATGGAAAACGCCAGCAACGCGGCCTTTTTACGGTTCCT  
GGCCTTTTGCTTATAAGGGATTTTGCCGATTTCCGGCCTATTGGTTAAAAAATGAG  
CTGATTTAACAAAAATTTAACGCGAATTTAACAAAAATTTAACGCTTACAATTTA

GGTGGCACTTTTCGGGGAAATGTGCGCGGAACCCCTATTTGTTTATTTTTCTAAA  
TACATTCAAATATGTATCCGCTCATGAGACAATAACCCTGATAAATGCTTCAATA  
ATATTGAAAAGGAAGAGTATGAGTATTCAACATTTCCGTGTCGCCCTTATTCCC  
TTTTTTGCGGCATTTTGCCTTCCTGTTTTTGTCTACCCAGAAACGCTGGTGAAAG  
TAAAAGATGCTGAAGATCAGTTGGGTGCACGAGTGGGTACATCGAACTGGATC  
TCAACAGCGGTAAGATCCTTGAGAGTTTTCGCCCCGAAGAACGTTTTCCAATGA  
TGAGCACTTTTAAAGTTCTGCTATGTGGCGCGGTATTATCCCGTATTGACGCCG  
GGCAAGAGCAACTCGGTCGCCGCATACACTATTCTCAGAATGACTTGGTTGAGT  
ACTCACCAGTCACAGAAAAGCATCTTACGGATGGCATGACAGTAAGAGAATTAT  
GCAGTGCTGCCATAACCATGAGTGATAACACTGCGGCCAACTTACTTCTGACAA  
CGATCGGAGGACCGAAGGAGCTAACCGCTTTTTTGCACAACATGGGGGATCAT  
GTA ACTCGCCTTGATCGTTGGGAACCGGAGCTGAATGAAGCCATACCAAACGAC  
GAGCGTGACACCACGATGCCTGTAGCAATGGCAACAACGTTGCGCAAACCTATTA  
ACTGGCGAACTACTTACTCTAGCTTCCCGGCAACAATTAATAGACTGGATGGAG  
GCGGATAAAGTTGCAGGACCACTTCTGCGCTCGGCCCTTCCGGCTGGCTGGTT  
TATTGCTGATAAATCTGGAGCCGGTGAGCGTGGGTCTCGCGGTATCATTGCAGC  
ACTGGGGCCAGATGGTAAGCCCTCCCGTATCGTAGTTATCTACACGACGGGGA  
GTCAGGCAACTATGGATGAACGAAATAGACAGATCGCTGAGATAGGTGCCTCAC  
TGATTAAGCATTGGTAACTGTCAGACCAAGTTTACTCATATATACTTTAGATTGAT  
TTAAAACCTTCATTTTTAATTTAAAAGGATCTAGGTGAAGATCCTTTTTGATAATCT  
CATGACCAAATCCCTTAACGTGAGTTTTCGTTCCACTGAGCGTCAGACCCCGT  
AGAAAAGATCAAAGGATCTTCTTGAGATCCTTTTTTCTGCGCGTAATCTGCTGC  
TTGCAAACAAAAAACCACCGCTACCAGCGGTGGTTTGTGGCCGGATCAAGAG  
CTACCAACTCTTTTTCCGAAGGTA ACTGGCTTCAGCAGAGCGCAGATAACCAAT  
ACTGTCCTTCTAGTGTAGCCGTAGTTAGGCCACCACTTCAAGAACTCTGTAGCA  
CCGCCTACATACCTCGCTCTGCTAATCCTGTTACCAGTGGCTGCTGCCAGTGGC  
GATAAGTCGTGTCTTACCGGGTTGGACTCAAGACGATAGTTACCGGATAAGGCG  
CAGC

pRC2313

GGTCGGGCTGAACGGGGGGTTCGTGCACACAGCCCAGCTTGGAGCGAACGAC  
CTACACCGAACTGAGATACCTACAGCGTGAGCTATGAGAAAGCGCCACGCTTCC  
CGAAGGGAGAAAGGCGGACAGGTATCCGGTAAGCGGCAGGGTTCGGAACAGGA  
GAGCGCACGAGGGAGCTTCCAGGGGGAAACGCCTGGTATCTTTATAGTCCTGT  
CGGGTTTTCGCCACCTCTGACTTGAGCGTCGATTTTTGTGATGCTCGTCAGGGGG  
GCGGAGCCTATGGAAAACGCCAGCAACGCGGCCTTTTTACGGTTCCTGGCCT  
TTTGCTGGCCTTTTGTCTACATGTGGCCTACGTTTTAATGCCAGCAAAAATGGTG  
AATTACCTGGATAATCAACTCACGGGTGGGTTTAATAAACCGCGTCTCCAGATAT  
TCATCAGGCTGATGAGCTTGATTGATGGAACCCGGACCGAGCACCAGCGTAGG  
GCATAACGTTTGAATAAACGGCGCTTCGGTACAGTAATTCACCACTTCGGTTTTT  
GCTCCGAGCAATTTCTCAACCACTTCAACCAGTTGATGATTCCGGTGGGCATTCA  
TAGCCAGGGATCGGCGGATGCAGCTCGTCGACCGTCAGACGACCCGGCCAGC  
GTTGCTCACCGGAGCCAATGCATCGTTGAGCAAACCATTAAGTTCATTGAGTG

TCATGCCAGGCAGCGGACGAATATCCATATGCAACTCACAGCAAGCGCAAATAC  
GGTTAGAAGCGTCGCCACCGTGAATATGCCCGAGGTTGAGCGTAGGGTATGGC  
ACGGTAAACGCTTCGTAGTGATAACGTTCTTTCAGGTTATCGCGCAATTGCAAAA  
TATGCCCGATGGCGTCGTGCATTAGTTCGATAGCGTTAACTCCGCGTGCTGGAT  
CGCTGGAGTGCCCCGACTGGCCCTGAATACGGATGGCGTTAGAGATATGACCT  
TTATGTGCGCGTACCGGTTGTAGTGACGTGCGTTCGCCAATGATGGCGCAATCC  
GGGCGCAGGGCGGTAGTTTCGGCAAATAACGCGCTCCGGCCATACTGGTTTC  
TTCATCAGCAGTCGCCAGAATGTAGAGCGGTTTTTTCAGTTTCGTGACGTGAC  
ATCGCGTAGCGCATCAAGGATAAACGCAAAAAAGCCTTTCATGTGCGCGGTGCC  
TAAGCCGTAAAGCTTGCCGTCATGCTCCGTCAGTGTAACGGATCGCGCGTCCA  
GCGACCGTCATCAAATGGCACCGTATCGGTATGCCCCGCCAGCAACAAGCCGC  
CAGCCCCCTGTCCGATACTTGCCAGCATATTGAATTTGTTGCGAGTTCCTGGAA  
CAGGCTGCACTTCCACATTGAAGCCCAAATCTTTAAACCAGTCCGCCAGCAGAG  
TAATTAATCTGCATTGCTTTGATCGAGTGCCTCTTCCGTGGCGCTTATTGAAGG  
TGTGGCAATCAGAGCGCGGTAAATCTCGATAAATGGCGGTAATTTGTTTTTCATT  
GTTGACACACCTCTGGTCATGATAGTATCAATATTCATGCAGTATTTATGAATAA  
AAATACACTAACGTTGAGCGTAATAAAAACCCACCAGCCGTAAGGTGAATGTTTTA  
CGTTTAACTGGCAACCAGACATAAGAAGGTGAATAGCCCCGATGTTGAATACG  
CTGATTGTGGGTGCCAGCGGCTACGCTGGCGCAGAGCTAGTGACCTATGTAAA  
TCGCCATCCGCATATGAACATAACCGCTTTGACTGTTTCAGCGCAAAGCAATGA  
TGCGGGAAAGTTAATCTCCGATTTGCATCCGCAGCTAAAAGGCATCGTTGATCT  
GCCGTTGCAGCCGATGTCGGATATCAGCGAGTTTAGCCCAGGGGTGGACGTAG  
TGTTTCTCGCCACCGCCCATGAAGTTAGCCACGATTTAGCGCCGCAGTTTCTTG  
AAGCGGGCTGCGTGGTGTTCGACCTTTCGGCGCGTTCGTGTTAACGACGCC  
ACCTTCTATGAAAAATATTACGGCTTTACCCATCAATACCCGGAAGTGTGGAAC  
AGGCAGCCTACGGTCTGGCGGAGTGGTGCGGTAATAAATTAAGAAGCGAAT  
TTGATTGCGGTGCCGGGCTGTTATCCGACGGCGGCACAGCTGGCGCTGAAACC  
GTTGATTGATGCCGATCTTCTTGACCTCAATCAGTGGCCGGTGATCAACGCCAC  
CAGCGGCGTGAGCGGTGCAGGGCGTAAAGCGGCCATTTCAAACAGCTTTTGTG  
AAGTTAGCCTGCAACCGTATGGCGTCTTACTCATCGCCATCAACCAGAGATCG  
CCACACACCTCGGTGCTGACGTTATCTTACCCCCACATCTGGGCAATTTCCCGC  
GCGGCATTCTCGAAACCATTACCTGCCGCCTGAAATCGGGTGTGACCCAGGCG  
CAAGTCGCGCAAGTGTTACAGCAGGCGTATGCCATAAACCGCTGGTGCGGCT  
GTATGACAAAGGCGTTCGGGCGCTGAAAAATGTCGTTGGGCTGCCATTTTGCGA  
TATCGGGTTTGCCGTTCAGGGCGAGCATCTGATTATTGTGGCGACCGAAGACAA  
CTTACTGAAAGGCGCGGCGGCACAAGCGGTACAGTGCGCCAATATTCGTTTCG  
GCTATGCGGAAACGCAGTCTCTTATTTAAGGGTGAATGATGAATCCATTAATTA  
TCAAACCTGGGCGGCGTACTGCTGGATAGTGAAGAGGCGCTGGAACGTCTGTTT  
AGCGCACTGGTGAATTATCGTGAGTCACATCAGCGTCCGCTGGTGATTGTGCAC  
GGCGGCGGTTGCGTGGTGGATGAGCTGATGAAAGGGCTGAATCTGCCGGTGAA  
AAAGAAAAATGGCCTGCGGGTGACGCCTGCGGATCAGATAGACATTATCACCG  
GAGCACTGGCGGGAACGGCAAATAAAACCCTGTTGGCATGGGCGAAGAAACAT  
CAGATTGCGGCCGTAGGTTTGTCTCGGTGACGGCGACAGCGTCAAAGTGAC  
CCAGCTTGATGAAGAGTTAGGCCATGTTGGACTGGCGCAGCCAGGTTTCGCCTA

AGCTTATCAACTCCTTGCTGGAGAACGGTTATCTGCCGGTGGTCAGCTCCATTG  
GCGTAACAGACGAAGGGCAACTGATGAACGTCAATGCCGACCAGGCGGCAACG  
GCGCTGGCGGCAACGCTGGGCGCGGATCTGATTTTGCTCTCCGACGTCAGCGG  
CATTCTCGACGGCAAAGGGCAACGCATTGCCGAAATGACCGCCGCGAAAGCAG  
ACAACCTGATTGAGCAGGGCATTACTACTGACGGCATGATAGTAAAAGTGAACG  
CGGCGCTGGATGCGGCCCGCACGCTGGGCCGTCCGGTAGATATCGCCTCCTG  
GCGTCATGCGGAGCAGCTTCCGGCACTGTTTAAACGGTATGCCGATGGGTACGC  
GGATTTTAGCTTAAGTTTTGTTGGCCGGAGGCGCAGCTTCCGGCATTGAATTT  
CAAATAAGGAAACAGAGTTATGGCACTTTGGGGCGGGCGTTTTACCCAGGCA  
GCAGATCAACGGTTCAAACAATTCAACGACTCACTGCGCTTTGATTACCGTCTG  
GCGGAGCAGGATATTGTTGGCTCTGTGGCCTGGTCCAAAGCCCTGGTCACGGT  
AGGCGTGTTAACCGCAGAAGAGCAGGCGCAACTGGAAGAGGCGCTGAACGTGT  
TGCTGGAAGATGTTTCGCGCCAGGCCACAACAATCCTTGAAAGCGACGCCGAA  
GATATCCATAGCTGGGTGGAAGGCAAACCTGATCGACAAAGTGGGCCAGTTAGG  
CAAAAAGCTGCATACCGGGCGTAGCCGTAATGATCAGGTAGCGACTGACCTGA  
AACTGTGGTGCAAAGATACCGTTAGCGAGTTACTGACGGCTAACCGGCAGCTG  
CAATCGGCGCTGGTGAAACCGCACAAAACAATCAGGACGCGGTAATGCCAGG  
TTACACTCACCTGCAACGCGCCAGCCGGTGACGTTTCGCGCACTGGTGCCTGG  
CCTATGTTGAGATGCTGGCGCGTGATGAAAGCCGTTTGCAGGATGCGCTTAAGC  
GTCTGGATGTCAGCCCGCTAGGCTGTGGCGCGCTGGCGGGAACGGCCTATGAA  
ATCGACCGTGAACAGTTAGCAGGCTGGCTGGGCTTTGCTTCGGCGACCCGTAA  
CAGTCTCGACAGCGTTTCTGACCGTGACCATGTGTTGAACTGCTTTCTGCTGC  
CGCTATCGGCATGGTGCATCTGTCGCGTTTTGCTGAAGATCTGATTTTCTTTAAC  
ACCGGCGAAGCGGGGTTTTGTGGAGCTTTCTGACCGCGTGACTTCCGGTTCATC  
ATTAATGCCGCAGAAGAAAAACCCGGATGCGCTGGAGCTGATTCGCGGTAAAT  
GCGGCCGGGTGCAGGGGGCGTTAACCGGCATGATGATGACGCTGAAAGGTTT  
GCCGCTGGCTTACAACAAGATATGCAGGAAGACAAAGAAGGTCTGTTTCGACG  
CGCTCGATACCTGGCTGGACTGCCTGCATATGGCGGCGCTGGTGTGACGGC  
ATTCAGGTGAAACGTCCACGTTGCCAGGAAGCGGCTCAGCAGGGTTACGCCAA  
CGCCACCGAACTGGCGGATTATCTGGTGGCGAAAGGCGTACCGTTCGCGGAGG  
CGCACCATATTGTTGGTGAAGCGGTGGTGGAAAGCCATTCGTCAGGGCAAACCG  
CTGGAAGATCTGCCGCTCAGTGAGTTGCAGAAATTCAGTCAGGTGATTGACGAA  
GATGTCTATCCGATTCTGTCGCTGCAATCGTGCCTCGACAAGACATGTTCTTTCC  
TGCGTTATCCCCTGATTCTGTGGATAACCGTATTACCGCCTTTGAGTGAGCTGAT  
ACCGCTCGCCGCAGCCGAACGACCGAGCGCAGCGAGTCAGTGAGCGAGGAAG  
CGGAAGAGCGCCAATACGCAAACCGCCTCTCCCCGCGCGTTGGCCGATTCAT  
TAATGCAGCTGGCACGACAGGTTTCCCGACTGGAAAGCGGGCAGTGAGCGCAA  
CGCAATTAATGTGAGTTAGCTCACTCATTAGGCACCCCAGGCTTTACACTTTATG  
CTTCCGGCTCGTATGTTGTGTGGAATTGTGAGCGGATAACAATTCACACAGGA  
AACAGCTATGACCATGATTACGCCAAGCGCGCAATTAACCCTCACTAAAGGGAA  
CAAAGCTGGAGCTCCACCGCGGTGGCCGGCCGCTCTAGAACTAGTGGATCCCC  
CGGGCTGCAGGAATTCGATATCAAGCTTATCGATACCGTCGACCTCGAGGGGG  
GGCCCGGTACCCAATTCGCCCTATAGTGAGTCGTATTACGCGCGCTCACTGGC  
CGTCGTTTTACAACGTCGTGACTGGGAAAACCCTGGCGTTACCCAATTAATCG



CCTTGCAGCACATCCCCCTTTTCGCCAGCTGGCGTAATAGCGAAGAGGCCCGCA  
CCGATCGCCCTTCCCAACAGTTGCGCAGCCTGAATGGCGAATGGGACGCGCCC  
TGTAGCGGCGCATTAAAGCGCGGGGTGTGGTGGTTACGCGCAGCGTGACCG  
CTACACTTGCCAGCGCCCTAGCGCCCGCTCCTTTTCGCTTTCTTCCCTTCTTTCT  
CGCCACGTTTCGCCGGCTTTCCCGTCAAGCTCTAAATCGGGGGCTCCCTTTAG  
GGTTCCGATTTAGTGCTTTACGGCACCTCGACCCCAAAAACTTGATTAGGGTG  
ATGGTTCACGTAGTGCAATTTAGGTGGCACTTTTCGGGGAAATGTGCGCGGAAC  
CCCTATTTGTTTATTTTTCTAAATACATTCAAATATGTATCCGCTCATGAGACAAT  
AACCTGATAAATGCTTCAATAATATTGAAAAAGGAAGAGTATGAGTATTCAACA  
TTCCGTGTCGCCCTTATTCCCTTTTTTTCGGCATTTCCTTCCCTGTTTTTGCTC  
ACCCAGAAACGCTGGTGAAAGTAAAAGATGCTGAAGATCAGTTGGGTGCACGA  
GTGGGTACATCGAACTGGATCTCAACAGCGGTAAGATCCTTGAGAGTTTTTCGC  
CCCGAAGAACGTTTTCCAATGATGAGCACTTTTAAAGTTCTGCTATGTGGCGCG  
GTATTATCCCGTATTGACGCCGGCAAGAGCAACTCGGTGCGCCGCATACACTAT  
TCTCAGAATGACTTGGTTGAGTACTACCAGTCACAGAAAAGCATCTTACGGAT  
GGCATGACAGTAAGAGAATTATGCAGTGCTGCCATAACCATGAGTGATAACACT  
GCGGCCAACTTACTTCTGACAACGATCGGAGGACCGAAGGAGCTAACCGTTTTT  
TTGCACAACATGGGGGATCATGTAACCTCGCCTTGATCGTTGGGAACCGGAGCTG  
AATGAAGCCATACCAAACGACGAGCGTGACACCACGATGCCTGTAGCAATGGC  
AACAAACGTTGCGCAAACCTATTAACCTGGCGAACTACTTACTCTAGCTTCCCGGCA  
ACAATTAATAGACTGGATGGAGGCGGATAAAGTTGCAGGACCACTTCTGCGCTC  
GGCCCTTCCGGCTGGCTGGTTTATTGCTGATAAATCTGGAGCCGGTGAGCGTG  
GGTCTCGCGGTATCATTGCAGCACTGGGGCCAGATGGTAAGCCCTCCCGTATC  
GTAGTTATCTACACGACGGGGAGTCAGGCAACTATGGATGAACGAAATAGACAG  
ATCGCTGAGATAGGTGCCTCACTGATTAAGCATTGGTAACCTGTCAGACCAAGTT  
TACTCATATATACTTTAGATTGATTTAAAACCTTCATTTTTAATTTAAAAGGATCTAG  
GTGAAGATCCTTTTTGATAATCTCATGACCAAATCCCTTAACGTGAGTTTTTCGT  
TCCACTGAGCGTCAGACCCCGTAGAAAAGATCAAAGGATCTTCTTGAGATCCTT  
TTTTTCTGCGCGTAATCTGCTGCTTGCAAACAAAAAAACCACCGCTACCAGCGG  
TGGTTTGTGGCCGATCAAGAGCTACCAAACCTTTTTCCGAAGGTAACCTGGCTT  
CAGCAGAGCGCAGATACCAAATACTGTCCTTCTAGTGTAGCCGTAGTTAGGCCA  
CCACTTCAAGAACTCTGTAGCACCGCCTACATACCTCGCTCTGCTAATCCTGTTA  
CCAGTGGCTGCTGCCAGTGGCGATAAGTCGTGTCTTACCGGGTTGGACTCAAG  
ACGATAGTTACCGGATAAGGCGCAGCGGTTCGGGCTGAACGGGGGGTTTCGTGC  
ACACAGCCCAGCTTGGAGCGAACGACCTACACCGAACTGAGATACCTACAGCG  
TGAGCTATGAGAAAGCGCCACGCTTCCCGAAGGGAGAAAGGCGGACAGGTATC  
CGGTAAGCGGCAGGGTTCGGAACAGGAGAGCGCACGAGGGAGCTTCCAGGGGG  
AAACGCCTGGTATCTTTATAGTCCTGTTCGGGTTTTCGCCACCTCTGACTTGAGCG  
TCGATTTTTGTGATGCTCGTCAGGGGGGCGGAGCCTATGGAAAACGCCAGCA  
ACGCGGCCTTTTTACGGTTCCTGGCCTTTTGCTTATAAGGGATTTTGCCGATTC  
GGCCTATTGGTTAAAAAATGAGCTGATTTAACAAAAATTTAACGCGAATTTAAC  
AAAATATTAACGCTTACAATTTAGGTGGCACTTTTCGGGGAAATGTGCGCGGAA  
CCCCTATTTGTTTATTTTTCTAAATACATTCAAATATGTATCCGCTCATGAGACAA  
TAACCCTGATAAATGCTTCAATAATATTGAAAAAGGAAGAGTATGAGTATTCAAC

ATTTCCGTGTCGCCCTTATTCCCTTTTTTGCGGCATTTCCTGTTTTTGGCT  
CACCCAGAAACGCTGGTGAAAGTAAAAGATGCTGAAGATCAGTTGGGTGCACG  
AGTGGGTTACATCGAACTGGATCTCAACAGCGGTAAGATCCTTGAGAGTTTTCG  
CCCCGAAGAACGTTTTCCAATGATGAGCACTTTTAAAGTTCTGCTATGTGGCGC  
GGTATTATCCCGTATTGACGCCGGCAAGAGCAACTCGGTCGCCGCATACTA  
TTCTCAGAATGACTTGGTTGAGTACTCACCAGTCACAGAAAAGCATCTTACGGAT  
GGCATGACAGTAAGAGAATTATGCAGTGTGCCATAACCATGAGTGATAACACT  
GCGGCCAACTTACTTCTGACAACGATCGGAGGACCGAAGGAGCTAACCGCTTTT  
TTGCACAACATGGGGGATCATGTAACCTCGCCTTGATCGTTGGGAACCGGAGCTG  
AATGAAGCCATAACCAACGACGAGCGTGACACCACGATGCCTGTAGCAATGGC  
AACAAACGTTGCGCAAACCTATTAACCTGGCGAACTACTTACTCTAGCTTCCCGGCA  
ACAATTAATAGACTGGATGGAGGCGGATAAAGTTGCAGGACCACTTCTGCGCTC  
GGCCCTTCCGGCTGGCTGGTTTTATTGCTGATAAATCTGGAGCCGGTGAGCGTG  
GGTCTCGCGGTATCATTGCAGCACTGGGGCCAGATGGTAAGCCCTCCCGTATC  
GTAGTTATCTACACGACGGGGAGTCAGGCAACTATGGATGAACGAAATAGACAG  
ATCGCTGAGATAGGTGCCTCACTGATTAAGCATTGGTAACTGTCAGACCAAGTT  
TACTCATATATACTTTAGATTGATTTAAAACCTTCATTTTTAATTTAAAAGGATCTAG  
GTGAAGATCCTTTTTGATAATCTCATGACCAAATCCCTTAACGTGAGTTTTTCGT  
TCCACTGAGCGTCAGACCCCGTAGAAAAGATCAAAGGATCTTCTTGAGATCCTT  
TTTTCTGCGCGTAATCTGCTGCTTGCAAACAAAAAACCACCGCTACCAGCGG  
TGGTTTGTGGCCGGATCAAGAGCTACCAACTCTTTTTCCGAAGGTAACCTGGCTT  
CAGCAGAGCGCAGATACCAAATACTGTCCTTCTAGTGTAGCCGTAGTTAGGCCA  
CCTTCAAGAACTCTGTAGCACCGCCTACATACCTCGCTCTGCTAATCCTGTTA  
CCAGTGGCTGCTGCCAGTGGCGATAAGTCGTGTCTTACCGGGTTGGACTCAAG  
ACGATAGTTACCGGATAAGGCGCAGC

|            |                                       |
|------------|---------------------------------------|
| Spacer 1a  | AAAC AGGCACCCCAGGCTTTACACTTTATGCTTCG  |
| Spacer 1b  | AAAACGAAGCATAAAGTGTAAGCCTGGGGTGCCT    |
| Spacer 2a  | AAAC TACGAGCCGGAAGCATAAAGTGTAAGCCTG   |
| Spacer 2b  | AAAACAGGCTTTACACTTTATGCTTCCGGCTCGTA   |
| Spacer 3a  | AAAC TCCGGCTCGTATGTTGTGTGAAATTGTGAGG  |
| Spacer 3b  | AAAACCTCACAATTTACACAACATACGAGCCGGA    |
| Spacer 4a  | AAAC TCCGCTCACAATTTACACAACATACGAGCG   |
| Spacer 4b  | AAAACGCTCGTATGTTGTGTGAAATTGTGAGCGGA   |
| Spacer 5a  | AAAC TGAAATTGTGAGCGGATAACAATTTACACAG  |
| Spacer 5b  | AAAACGTGTGAAATTGTTATCCGCTCACAATTTCA   |
| Spacer 6a  | AAAC AAACAGCTATGACCATGATTACGGATTACAG  |
| Spacer 6b  | AAAACGTGAATCCGTAATCATGGTCATAGCTGTTT   |
| Spacer 7a  | AAAC GGTTTTCCAGTCACGACGTTGTAAAACGAG   |
| Spacer 7b  | AAAACTCGTTTTACAACGTCGTGACTGGGAAAACC   |
| Spacer 8a  | AAAC TGAATGGCGAATGGCGCTTTGCCTGGTTTTCG |
| Spacer 8b  | AAAACGAAACCAGGCAAAGCGCCATTCGCCATTCA   |
| Spacer 9a  | AAAC ACCCGTCGGATTCTCCGTGGGAACAAACGGG  |
| Spacer 9b  | AAAACCCGTTTGTTCACGAGGAGAAATCCGACGGGT  |
| Spacer 10a | AAAC TCACATTTAATGTTGATGAAAGCTGGCTACG  |
| Spacer 10b | AAAACGTAGCCAGCTTTCATCAACATTAATGTGA    |

### Supplemental Table 2 CRISPR spacer sequences

Sequences of the oligonucleotides that were annealed together to make the oligoduplexes encoding the spacer sequences encoding the ten candidate gRNAs used in Figure 1.

|                         |                                                                                                                                                                                                     |                                                                                                                                                                                                                                                               |
|-------------------------|-----------------------------------------------------------------------------------------------------------------------------------------------------------------------------------------------------|---------------------------------------------------------------------------------------------------------------------------------------------------------------------------------------------------------------------------------------------------------------|
| RNC target top          | <u>CGGATTCACTGGCCGT</u><br><u>CGTTTTACAACGTCGT</u><br><u>GACTGGGAAAACCCTG</u><br>GC                                                                                                                 | Substrate used in EMSAs to demonstrate reconstituted sgRNA-dCas9-transposase binding to target DNA. Anneals with RNC target bottom. sgRNA hybridizes with underlined sequence.                                                                                |
| RNC target bottom       | [Cy5]-<br>GCCAGGGTTTTCCAG<br>TCACGACGTTGTAAAA<br>CGACGGCCAGTGAATC<br>CG                                                                                                                             | Substrate used in EMSAs to demonstrate reconstituted sgRNA-dCas9-transposase binding to target DNA. Anneals with RNA target top                                                                                                                               |
| Hsmar1 substrate top    | ACTAGTGGATCCCCCG<br>GGCTGCAGGAATTCTA<br><u>TTAGGTTGGTGCAAAA</u><br><u>GTAATTGCGGTTTTGG</u><br>ATCCCTGT-[Cy5]                                                                                        | Substrate used in EMSAs to demonstrate transposase binding to inverted terminal repeat (ITR). Anneals with Hsmar1 substrate bottom. ITR is underlined.                                                                                                        |
| Hsmar1 substrate bottom | ACAGGGATCCAAAACC<br><u>GCAATTACTTTTGCACC</u><br><u>AACCTAATAGAATTCCT</u><br>GCAGCCCGGGGGATC<br>CACTAGT-[Cy5]                                                                                        | Substrate used in EMSAs to demonstrate transposase binding to ITR. Anneals with Hsmar1 substrate top. ITR is underlined.                                                                                                                                      |
| sgRNA                   | <u>GUCACGACGUUGUAAA</u><br><u>ACG</u> <i>aguuuagagcua</i> <b>GA</b><br><b>AA</b> <i>UAGCAAGUAAAAU</i><br><i>AAGGCUAGUCCGUUA</i><br><i>UCAACUUGAAAAAGUG</i><br><i>GCACCGAGUCGGUGC</i><br><i>UUUU</i> | sgRNA used for reconstitution with purified dCas9-transposase. Green sequence is the spacer (crRNA targeting sequence), Italicized sequence is the scaffold composed of: i) lowercase = crRNA repeat, ii) bold = tetraloop and iii) blue = tracrRNA sequence. |

Supplemental Table 3 Oligonucleotide sequences
